# Supplementary material for: DNA motifs determining the accuracy of repeat duplication during CRISPR adaptation in Haloarcula hispanica
Source: PubMed Central journal article supplement — Nucleic Acids Res. 2016 Apr 16;44(9):4266–77. doi: 10.1093/nar/gkw260 (PMC4872114; doi:10.1093/nar/gkw260), 2016-04-16
Supplement: supp_gkw260_nar-03529-h-2015-File008.pdf [file supp_gkw260_nar-03529-h-2015-File008.pdf]

**SUPPLEMENTARY DATA FOR**

**DNA motifs determining the accuracy of repeat duplication**  
**during CRISPR adaptation in *Haloarcula hispanica***

**Rui Wang<sup>1,2</sup>, Ming Li<sup>1,3</sup>, Luyao Gong<sup>2</sup>, Songnian Hu<sup>3</sup>, Hua Xiang<sup>1</sup>**

<sup>1</sup>*State Key Laboratory of Microbial Resources,*

*Institute of Microbiology, Chinese Academy of Sciences, Beijing, China.*

<sup>2</sup>*University of Chinese Academy of Sciences, Beijing, China*

<sup>3</sup>*Beijing Institute of Genomics, Chinese Academy of Sciences, Beijing, China*

**Summary of supplementary figures and tables:**

**Figure S1.** A diagram showing the construction of the DF60PA strain.

**Figure S2.** Multi-alignment of the leader and repeat sequences of haloarchaeal CRISPRs that share similar repeats.

**Figure S3.** The different immunity effects of a-CRISPRs with a new spacer.

**Figure S4.** Mutations surrounding the leader-repeat junction differently impaired a-CRISPR expansion.

**Figure S5.** A standard curve of PCR on cultures with varying amounts of expanded samples.

**Figure S6.** The sequencing chromatograph of the expanded a-CRISPRs containing different mutations adjacent to the leader-repeat junction.

**Figure S7.** Some a-CRISPR mutants that failed to acquire new spacers.

**Table S1.** Strains and plasmids used in this study

**Table S2.** Oligonucleotides used in this study

**Table S3.** Spacers that were acquired from the HHPV-2 genome by different a-CRISPR constructs

**Data S1.** Sequencing results of different a-CRISPR constructs with spacer insertions.

## SUPPLEMENTARY FIGURES

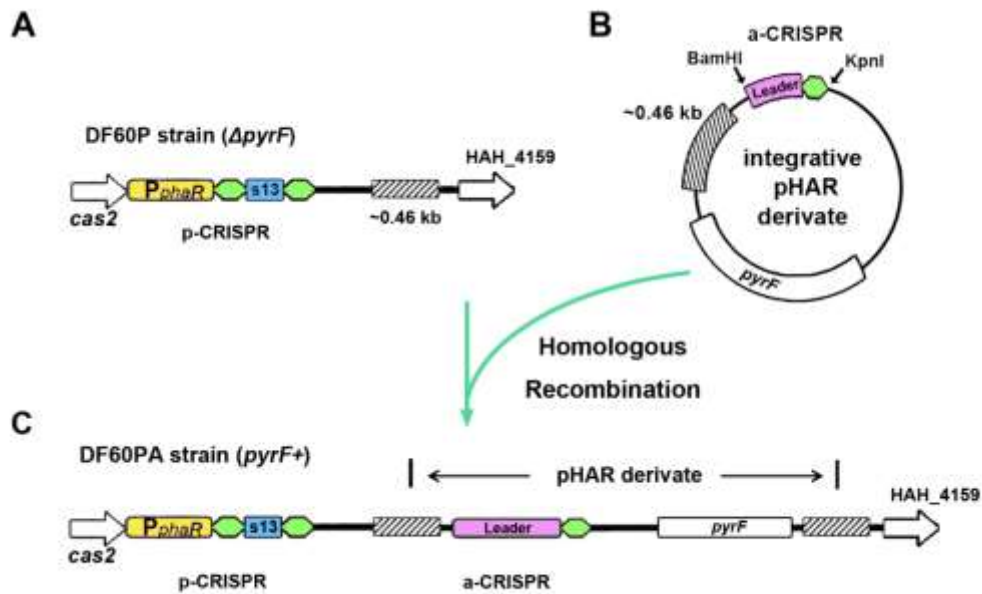

**Figure S1. A diagram showing the construction of the DF60PA strain.** (A) The wild-type CRISPR of the *H. hispanica* auxotrophic strain DF60 ( $\Delta pyrF$ ) was substituted by the priming-CRISPR (p-CRISPR), generating the DF60P strain. (B) The adaptation-CRISPR (a-CRISPR) construct (the leader and one repeat) was cloned into the pHAR-derived integrative vector, which carries a selection marker (*pyrF*) and a ~460-bp chromosomal sequence (shadowed) for homologous recombination. (C) Transformed into the DF60P strain and cultured under selective pressure (in AS168 medium devoid of yeast extract), the modified pHAR derivate integrates into the chromosome, resulting in the linear coexistence of p-CRISPR and a-CRISPR in DF60PA cells.

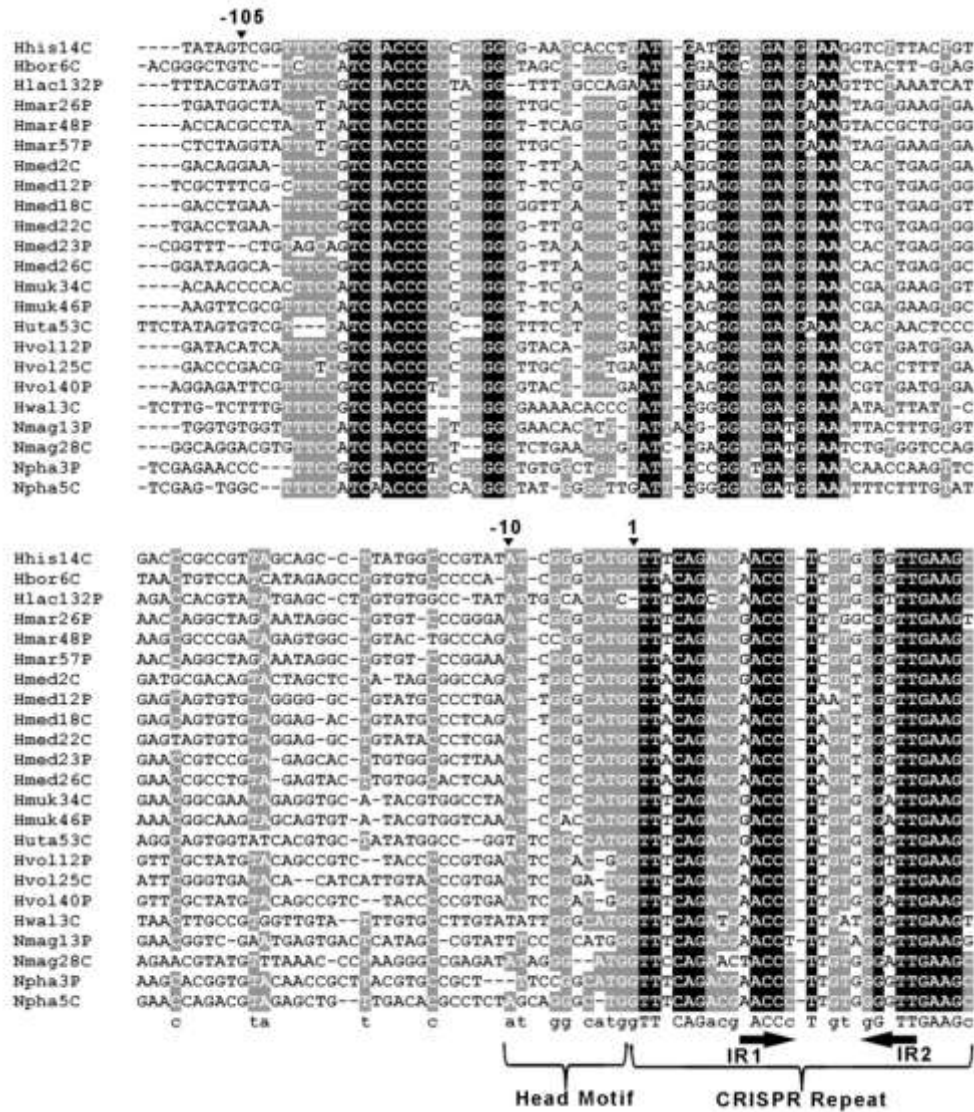

**Figure S2. Multi-alignment of the leader and repeat sequences of haloarchaeal CRISPRs that share similar repeats.** For each CRISPR, the first repeat and its upstream ~110-bp sequence (which contains the leader) were retrieved and aligned together. The first repeat-nucleotide is labeled by the number ‘1’, and the relative positions of some leader-nucleotides are also labeled. Nucleotides with high or medium conservation are shown in white against black or grey. The CRISPR repeat carries a pair of inverted repeats (designated IR1 and IR2). Each CRISPR is designated with four letters (which represent organisms), the repeat number, and a ‘C’ or ‘P’ letter to indicate its location (on the chromosome or a plasmid). The analyzed CRISPRs are from: *Haloquadratum walsbyi* (Hwal) DSM 16790, *Natrialba magadii* (Nmag) ATCC 43099 and *Natronomonas pharaonis* (Npha) DSM 2160. **Note that** the repeat length is conservatively 30 bp, with the exception of the 31-bp repeat from Hlac132P.

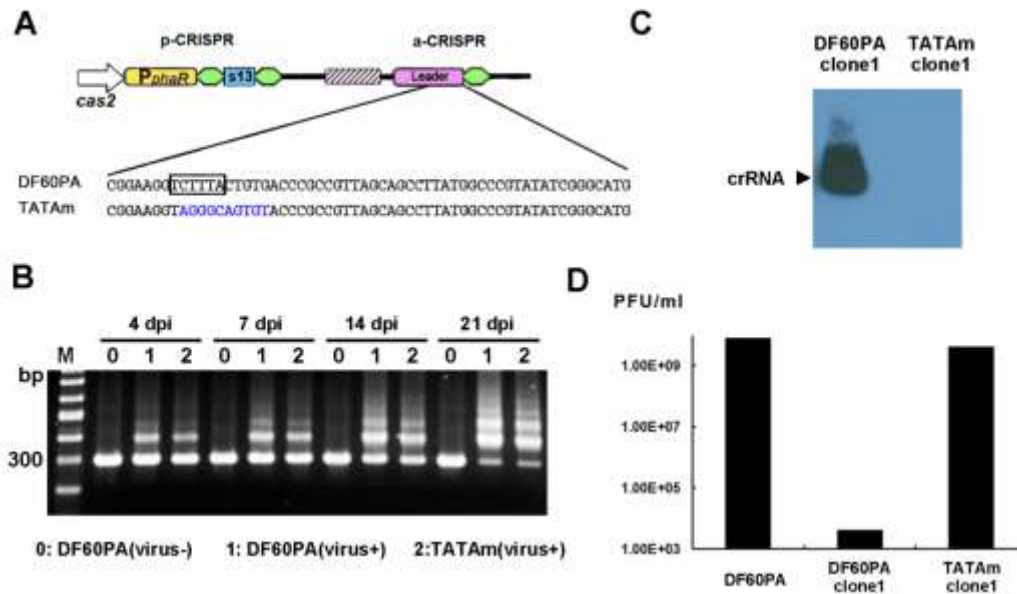

**Figure S3. The different immunity effects of a-CRISPRs with a new spacer.** (A) A mutant (TATAm) lacking the TATA box of the a-CRISPR was constructed. (B) Expansion of the a-CRISPRs in DF60PA and TATAm at 4, 7, 14, 21 days post HHPV-2 infection (dpi). The uninfected culture of DF60PA was used as the negative control. The gel shows a representative result of three replicates. Lane M, dsDNA size marker. (C) Northern blotting analysis of the crRNA in DF60PA\_clone1 and TATAm\_clone1 (Supplementary Data S1). A biotin-labeled repeat-specific DNA probe was used for hybridization, and was detected using the Chemiluminescent Nucleic Acid Detection Module Kit (Thermo Fisher Scientific). (D) During the plaque assay, the new spacer of DF60PA\_clone1 caused a  $\sim 10^6$ -fold drop in PFU/ml compared to its parental strain DF60PA. In contrast, the new spacer in TATAm did not provide evident immunity. Three replicates were performed for each strain to get an average PFU value. **Note that** the virus-free DF60PA\_clone1 was directly isolated from the virus-infected DF60PA culture, but from the infected culture of TATAm, virus-free clones could hardly be isolated, so we amplified the expanded a-CRISPR from TATAm\_clone1, re-constructed it in the virus-free DF60P strain (using PHAR-in), and then performed the plaque assay.

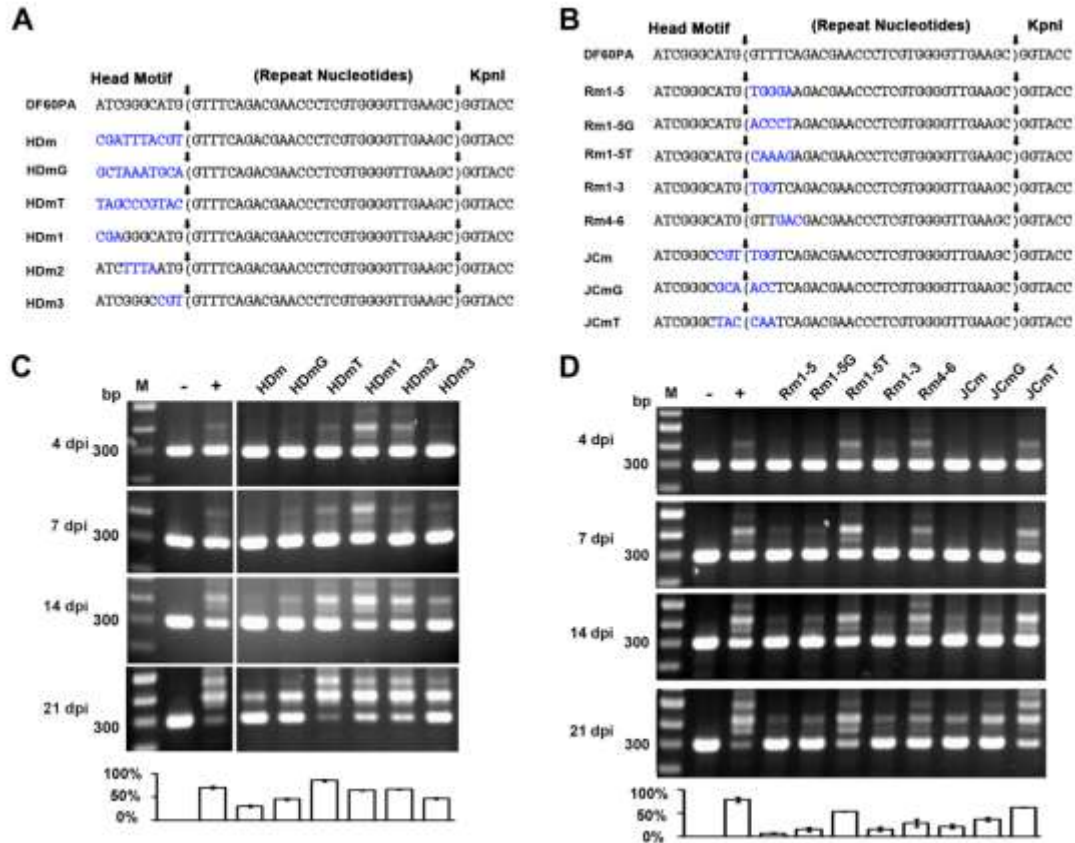

**Figure S4. Mutations surrounding the leader-repeat junction differently impaired a-CRISPR expansion.** Various mutations (in blue) were introduced into the head motif (**A**), the first repeat-nucleotides, or both (**B**). Sequences between vertical arrows were duplicated during spacer integration. (**C**) and (**D**) respectively show the expansion of the a-CRISPRs in panels **A** and **B** at 4, 7, 14, 21 days post HHPV-2 infection (dpi). DNA from the infected (+) or uninfected (-) DF60PA cells was used as the positive or negative control. Three replicates were tested for each mutant, and each gel shows a representative result. The ~300-bp (parental) and larger (expanded) bands of the 21-dpi samples were relatively quantified, and the percentage of expanded PCR products in each lane is shown in the histogram. Lane Ms, dsDNA size markers.

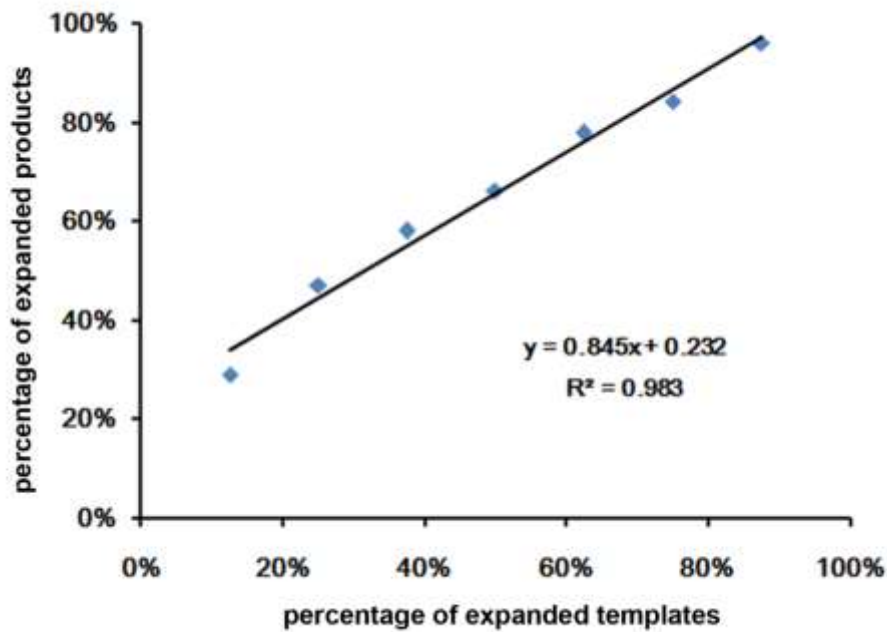

**Figure S5. A standard curve of PCR on cultures with varying amounts of expanded samples.** The DF60PA (containing the parental a-CRISPR) and DF60PA\_clone1 (containing the a-CRISPR expanded by one new spacer) exponential cultures of the same OD were mixed in different ratios (7:1, 6:2, 5:3, 4:4, 3:5, 2:6 and 1:7), and the mixtures were immediately subjected to the PCR procedure applied in our adaptation assays. As described in the main text, the parental and expanded PCR products were relatively quantified. Three replications were performed to get an average percentage of expanded PCR products for each of the seven samples. The observed percentage of expanded PCR products and the theoretical percentage of expanded templates are shown on this scatter plot, and their linear correlation coefficient is given.

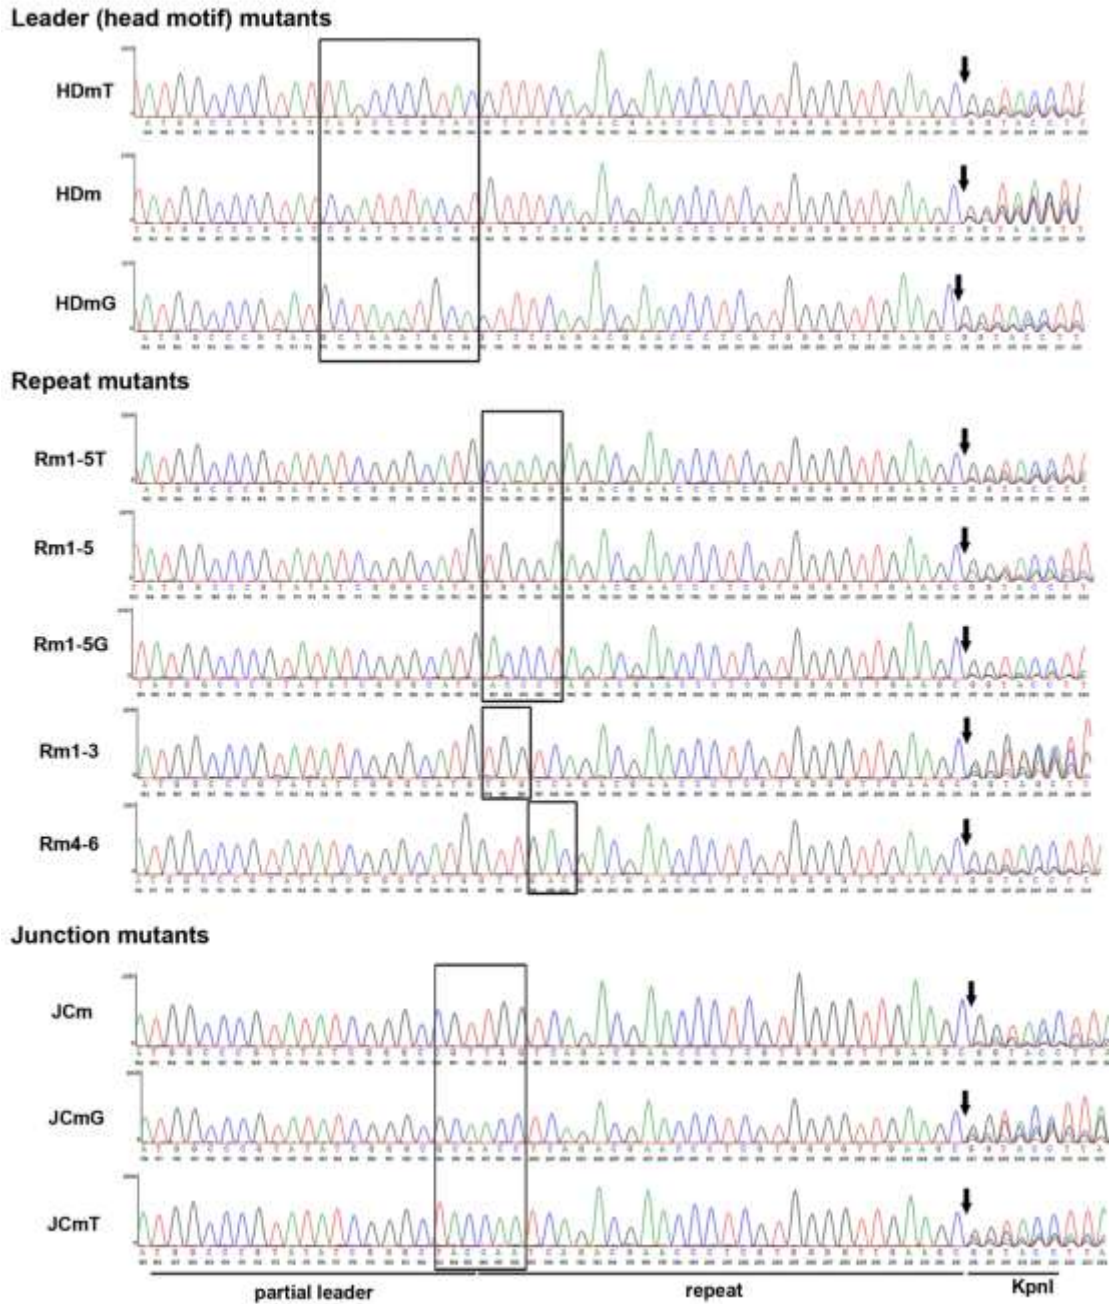

**Figure S6. The sequencing chromatograph of the expanded a-CRISPRs containing different mutations adjacent to the leader-repeat junction. Primer Exp-Fa (Table S2) was used for DNA sequencing. Mutated nucleotides are framed. Multiple nucleotide signals were detected for positions downstream of each vertical arrow. The leader and repeat sequences, as well as the KpnI restriction site are respectively indicated at the bottom.**

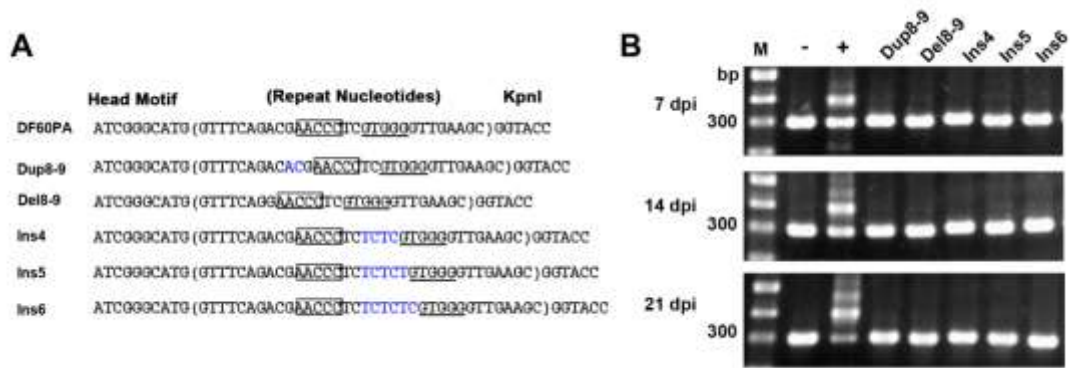

**Figure S7. Some a-CRISPR mutants that failed to acquire new spacers.** (A) Schematic representation of the mutants. In Dup8-9 and Del8-9, the nucleotides 8-9 of the a-CRISPR repeat (in brackets) were duplicated and deleted, respectively. In Ins4, Ins5 and Ins6, four to six extra nucleotides were inserted between the AACCC (boxed) and GTGGG (underlined) motifs. Extra nucleotides are in blue. (B) No expansion was observed for any of the mutants listed in panel A at 7, 14 or 21 days post HHPV-2 infection (dpi). DNA from the infected (+) or uninfected (-) DF60PA cells was used as the positive or negative control. Three replicates were tested for each mutant, and each gel shows a representative result. Lane Ms, dsDNA size markers.



## SUPPLEMENTARY TABLES

**Table S1.** Strains and plasmids used in this study

| Strains/Plasmids            | Description                                                   | Source or reference |
|-----------------------------|---------------------------------------------------------------|---------------------|
| <i>H. hispanica</i> strains |                                                               |                     |
| DF60                        | <i>pyrF</i> -deleted strain of <i>H. hispanica</i> ATCC 33960 | (1)                 |
| DF60P                       | DF60 with its wild-type CRISPR substituted by p-CRISPR        | This study          |
| DF60PA                      | DF60P transformed by the integrative plasmid pCR-A            | This study          |
| ΔCR                         | DF60 with its only CRISPR deleted                             | This study          |
| ΔCR-A                       | ΔCR transformed by the integrative plasmid pCR-A              | This study          |
| TATAm                       | DF60P transformed by the integrative plasmid pTATAm           | This study          |
| HDm                         | DF60P transformed by the integrative plasmid pHDm             | This study          |
| HDmG                        | DF60P transformed by the integrative plasmid pHDmG            | This study          |
| HDmT                        | DF60P transformed by the integrative plasmid pHDmT            | This study          |
| HDm1                        | DF60P transformed by the integrative plasmid pHDm1            | This study          |
| HDm2                        | DF60P transformed by the integrative plasmid pHDm2            | This study          |
| HDm3                        | DF60P transformed by the integrative plasmid pHDm3            | This study          |
| Rm1-5T                      | DF60P transformed by the integrative plasmid pRm1-5T          | This study          |
| Rm1-5                       | DF60P transformed by the integrative plasmid pRm1-5           | This study          |
| Rm1-5G                      | DF60P transformed by the integrative plasmid pRm1-5G          | This study          |
| Rm1-3                       | DF60P transformed by the integrative plasmid pRm1-3           | This study          |
| Rm4-6                       | DF60P transformed by the integrative plasmid pRm4-6           | This study          |
| JCmT                        | DF60P transformed by the integrative plasmid pJCmT            | This study          |
| JCm                         | DF60P transformed by the integrative plasmid pJCm             | This study          |
| JCmG                        | DF60P transformed by the integrative plasmid pJCmG            | This study          |
| Rm6-10                      | DF60P transformed by the integrative plasmid pRm6-10          | This study          |
| Rm11-15                     | DF60P transformed by the integrative plasmid pRm11-15         | This study          |
| Rm16-30                     | DF60P transformed by the integrative plasmid pRm16-30         | This study          |
| Rm10-12                     | DF60P transformed by the integrative plasmid pRm10-12         | This study          |
| Rm13-15                     | DF60P transformed by the integrative plasmid pRm13-15         | This study          |
| Rm18-22                     | DF60P transformed by the integrative plasmid pRm18-22         | This study          |
| Rm23-30                     | DF60P transformed by the integrative plasmid pRm23-30         | This study          |
| Rm26-30                     | DF60P transformed by the integrative plasmid pRm26-30         | This study          |
| Rm21-25                     | DF60P transformed by the integrative plasmid pRm21-25         | This study          |
| Rm16-20                     | DF60P transformed by the integrative plasmid pRm16-20         | This study          |
| Rm16-17                     | DF60P transformed by the integrative plasmid pRm16-17         | This study          |
| Rm-GT                       | DF60P transformed by the integrative plasmid pRm-GT           | This study          |
| Dup6                        | DF60P transformed by the integrative plasmid pDup6            | This study          |
| Del6                        | DF60P transformed by the integrative plasmid pDel6            | This study          |
| Dup6-7                      | DF60P transformed by the integrative plasmid pDup6-7          | This study          |

|                 |                                                                                                               |            |
|-----------------|---------------------------------------------------------------------------------------------------------------|------------|
| Del6-7          | DF60P transformed by the integrative plasmid pDel6-7                                                          | This study |
| Dup8-9          | DF60P transformed by the integrative plasmid pDup8-9                                                          | This study |
| Del8-9          | DF60P transformed by the integrative plasmid pDel8-9                                                          | This study |
| Dup16           | DF60P transformed by the integrative plasmid pDup16                                                           | This study |
| Del16           | DF60P transformed by the integrative plasmid pDel16                                                           | This study |
| Dup16-17        | DF60P transformed by the integrative plasmid pDup16-17                                                        | This study |
| Dup18           | DF60P transformed by the integrative plasmid pDup18                                                           | This study |
| Dup19           | DF60P transformed by the integrative plasmid pDup19                                                           | This study |
| Dup20           | DF60P transformed by the integrative plasmid pDup20                                                           | This study |
| Dup21-25        | DF60P transformed by the integrative plasmid pDup21-25                                                        | This study |
| Del21-25        | DF60P transformed by the integrative plasmid pDel21-25                                                        | This study |
| Ins3            | DF60P transformed by the integrative plasmid pIns3                                                            | This study |
| Ins4            | DF60P transformed by the integrative plasmid pIns4                                                            | This study |
| Ins5            | DF60P transformed by the integrative plasmid pIns5                                                            | This study |
| Ins6            | DF60P transformed by the integrative plasmid pIns6                                                            | This study |
| <b>Plasmids</b> |                                                                                                               |            |
| pHAR            | 4.0 kb; suicide vector containing <i>pyrF</i> and its native promoter                                         | (1)        |
| pCR-P           | 5.3 kb; modified pHAR to replace the wild-type CRISPR with p-CRISPR                                           | This study |
| p $\Delta$ CR   | 4.8 kb; modified pHAR to knock out the only CRISPR                                                            | This study |
| pHAR-in         | 4.4 kb; modified pHAR with a 460-bp chromosomal sequence                                                      | This study |
| pCR-A           | 4.6 kb; modified pHAR-in with an a-CRISPR structure containing the complete 105-bp leader and a single repeat | This study |
| pTATAm          | 4.6 kb; modified pCR-A with the TATA box mutated                                                              | This study |
| pHDm            | 4.6 kb; modified pCR-A with the head motif mutated                                                            | This study |
| pHDmG           | 4.6 kb; modified pCR-A with the head motif mutated                                                            | This study |
| pHDmT           | 4.6 kb; modified pCR-A with the head motif mutated                                                            | This study |
| pHDm1           | 4.6 kb; modified pCR-A with the head motif partially mutated                                                  | This study |
| pHDm2           | 4.6 kb; modified pCR-A with the head motif partially mutated                                                  | This study |
| pHDm3           | 4.6 kb; modified pCR-A with the head motif partially mutated                                                  | This study |
| pRm1-5          | 4.6 kb; modified pCR-A with the repeat nucleotides 1-5 mutated                                                | This study |
| pRm1-5T         | 4.6 kb; modified pCR-A with the repeat nucleotides 1-5 mutated                                                | This study |
| pRm1-5G         | 4.6 kb; modified pCR-A with the repeat nucleotides 1-5 mutated                                                | This study |
| pRm1-3          | 4.6 kb; modified pCR-A with the repeat nucleotides 1-3 mutated                                                | This study |
| pRm4-6          | 4.6 kb; modified pCR-A with the repeat nucleotides 4-6 mutated                                                | This study |
| pJCm            | 4.6 kb; modified pCR-A with the 6 bp at the leader-repeat junction mutated                                    | This study |
| pJCmT           | 4.6 kb; modified pCR-A with the 6 bp at the leader-repeat junction mutated                                    | This study |
| pJCmG           | 4.6 kb; modified pCR-A with the 6 bp at the leader-repeat junction mutated                                    | This study |
| pRm6-10         | 4.6 kb; modified pCR-A with the repeat nucleotides 6-10 mutated                                               | This study |
| pRm11-15        | 4.6 kb; modified pCR-A with the repeat nucleotides 11-15 mutated                                              | This study |
| pRm16-30        | 4.6 kb; modified pCR-A with the repeat nucleotides 16-30 mutated                                              | This study |
| pRm10-12        | 4.6 kb; modified pCR-A with the repeat nucleotides 10-12 mutated                                              | This study |
| pRm13-15        | 4.6 kb; modified pCR-A with the repeat nucleotides 13-15 mutated                                              | This study |
| pRm18-22        | 4.6 kb; modified pCR-A with the repeat nucleotides 18-22 mutated                                              | This study |
| pRm23-30        | 4.6 kb; modified pCR-A with the repeat nucleotides 23-30 mutated                                              | This study |

|           |                                                                       |            |
|-----------|-----------------------------------------------------------------------|------------|
| pRm26-30  | 4.6 kb; modified pCR-A with the repeat nucleotides 26-30 mutated      | This study |
| pRm21-25  | 4.6 kb; modified pCR-A with the repeat nucleotides 21-25 mutated      | This study |
| pRm16-20  | 4.6 kb; modified pCR-A with the repeat nucleotides 16-20 mutated      | This study |
| pRm16-17  | 4.6 kb; modified pCR-A with the repeat nucleotides 16-17 mutated      | This study |
| pRm-GT    | 4.6 kb; modified pCR-A with the repeat nucleotides 16, 17, 20 mutated | This study |
| pDup6     | 4.6 kb; modified pCR-A with the repeat nucleotide 6 duplicated        | This study |
| pDel6     | 4.6 kb; modified pCR-A with the repeat nucleotide 6 deleted           | This study |
| pDup6-7   | 4.6 kb; modified pCR-A with the repeat nucleotides 6-7 duplicated     | This study |
| pDel6-7   | 4.6 kb; modified pCR-A with the repeat nucleotides 6-7 deleted        | This study |
| pDup8-9   | 4.6 kb; modified pCR-A with the repeat nucleotides 8-9 duplicated     | This study |
| pDel8-9   | 4.6 kb; modified pCR-A with the repeat nucleotides 8-9 deleted        | This study |
| pDup16    | 4.6 kb; modified pCR-A with the repeat nucleotide 16 duplicated       | This study |
| pDel16    | 4.6 kb; modified pCR-A with the repeat nucleotide 16 deleted          | This study |
| pDup16-17 | 4.6 kb; modified pCR-A with the repeat nucleotides 16-17 duplicated   | This study |
| pDup18    | 4.6 kb; modified pCR-A with the repeat nucleotide 18 duplicated       | This study |
| pDup19    | 4.6 kb; modified pCR-A with the repeat nucleotides 19 duplicated      | This study |
| pDup20    | 4.6 kb; modified pCR-A with the repeat nucleotide 20 duplicated       | This study |
| pDup21-25 | 4.6 kb; modified pCR-A with the repeat nucleotides 21-25 duplicated   | This study |
| pDel21-25 | 4.6 kb; modified pCR-A with the repeat nucleotides 21-25 deleted      | This study |
| pIns3     | 4.6 kb; modified pCR-A with 3 extra repeat nucleotides                | This study |
| pIns4     | 4.6 kb; modified pCR-A with 4 extra repeat nucleotides                | This study |
| pIns5     | 4.6 kb; modified pCR-A with 5 extra repeat nucleotides                | This study |
| pIns6     | 4.6 kb; modified pCR-A with 6 extra repeat nucleotides                | This study |

**Table S2.** Oligonucleotides used in this study

| Primer <sup>a</sup>                   | 5'–3' sequence <sup>b</sup>                     |
|---------------------------------------|-------------------------------------------------|
| <b>For spacer acquisition assay</b>   |                                                 |
| Exp-Fp                                | TACGGCGACGATCCA <sup>a</sup> ACTGA              |
| Exp-Rp                                | CGACCAGCGCGAAGTAA                               |
| Exp-Fa                                | CGGGGTCATCCTCGTCTC                              |
| Exp-Ra                                | CCGCGAAACAGCTCAAACAG                            |
| <b>For DF60P and ΔCR construction</b> |                                                 |
| P-UF                                  | CGCGGATCCCTCGCAGACCGGGTACTAT                    |
| P-UR                                  | CTAGTCTAGACGACTATAGAAACCG                       |
| phaR-bridge2                          | CTAGTCTAGACGAAGGGAACATATATGTTACTGCAGGTACAA      |
| phaR-bridge1                          | TTACTGCAGGTACAACACCGAGTTAGGAGATGGTTTCAGACGAACCC |
| P-DF                                  | TTACGGACTGGTCGA                                 |
| P-DR                                  | ATAGGGTACCGGGCTTGCCGACTGAA                      |
| ΔCR-UF                                | CGCGGATCCCTCGCAGACCGGGTACTAT                    |
| ΔCR-UR                                | GAGGTGCGGTTTATAAACGGCGGGTCACAGTA                |
| ΔCR-DF                                | CTGTGACCCGCCGTTTATAAACCGCACCTCCTCAT             |

---

|                                                               |                                        |
|---------------------------------------------------------------|----------------------------------------|
| ΔCR-DR                                                        | ATAGGGTACCGGGCTTGCCGACTGAA             |
| <b>For modification of pHAR (to be an integrative vector)</b> |                                        |
| ChrSeq-F                                                      | CCCAAGCTTTGGGCTATCGTATTATGGGCACTA      |
| ChrSeq-R                                                      | CGCGGATCCTGGGCAATAGCAAGAAACCGTGAT      |
| <b>For a-CRISPR construction and modification</b>             |                                        |
| A-F                                                           | CGCGGATCCTCGGTTTCCGTCGAC               |
| A-R                                                           | CGGGGTACCGCTTCAACCCCACGA               |
| TATAm-DF                                                      | AAGGTAGGGCAGTGTACCCGCCGTTAGCAG         |
| TATAm-UR                                                      | CGGGTACACTGCCCTACCTTCCGTCGAC           |
| HDm-DF                                                        | CGTATCGATTACGTGTTTCAGACGAACCC          |
| HDm-UR                                                        | GAAACACGTAAATCGATACGGGCCATAAGG         |
| HDmT-DF                                                       | CGTATTAGCCCGTACGTTTCAGACGAACCC         |
| HDmT-UR                                                       | GAAACGTACGGGCTAATACGGGCCATAAGG         |
| HDmG-DF                                                       | CGTATGCTAAATGCAGTTTCAGACGAACCC         |
| HDmG-UR                                                       | GAAACTGCATTTAGCATAACGGGCCATAAGG        |
| HDm1-DF                                                       | CCTTATGGCCCGTATCGAGGGCATGGTTTCAGA      |
| HDm1-UR                                                       | TCTGAAACCATGCCCTCGATACGGGCCATAAGG      |
| HDm2-DF                                                       | TATGGCCCGTATATCTTTAATGGTTTCAGACGAA     |
| HDm2-UR                                                       | TTCGTCTGAAACCATTAAAAGATATACGGGCCATA    |
| HDm3-DF                                                       | GCCCGTATATCGGGCCGTGTTTCAGACGAACCC      |
| HDm3-UR                                                       | GGGTTTCGTCTGAAACACGGCCCGATATACGGGC     |
| Rm1-5-DF                                                      | GCATGTGGGAAGACGAACCCTCGTG              |
| Rm1-5-UR                                                      | CGTCTTCCACATGCCCGATATACG               |
| Rm1-5T-DF                                                     | GCATGCAAAGAGACGAACCCTCGTG              |
| Rm1-5T-UR                                                     | CGTCTCTTTCATGCCCGATATACG               |
| Rm1-5G-DF                                                     | GCATGACCCTAGACGAACCCTCGTG              |
| Rm1-5G-UR                                                     | CGTCTAGGGTCATGCCCGATATACG              |
| Rm1-3-DF                                                      | CGTATATCGGGCATGTGGTCAGACGAACCCTCG      |
| Rm1-3-UR                                                      | CGAGGGTTTCGTCTGACCACATGCCCGATATACG     |
| Rm4-6-DF                                                      | ATATCGGGCATGGTTGACGACGAACCCTCGTGG      |
| Rm4-6-UR                                                      | CCACGAGGGTTTCGTCTGTCACCAACCATGCCCGATAT |
| JCm-DF                                                        | GCCCGTATATCGGGCCGTTGGTCAGACGAACCC      |
| JCm-UR                                                        | GGGTTTCGTCTGACCAACGGCCCGATATACGGGC     |
| JCmT-DF                                                       | GCCCGTATATCGGGCTACCAATCAGACGAACCC      |
| JCmT-UR                                                       | GGGTTTCGTCTGATTGGTAGCCCGATATACGGGC     |
| JCmG-DF                                                       | GCCCGTATATCGGGCGCAACCTCAGACGAACCC      |
| JCmG-UR                                                       | GGGTTTCGTCTGAGGTTGCGCCCGATATACGGGC     |
| Rm6-10-DF                                                     | GTTTCCTCATAACCCTCGTG                   |
| Rm6-10-UR                                                     | GGGTTATGAGGAAACCATGC                   |
| Rm11-15-DF                                                    | AGACGCCAAATCGTGGGGTT                   |
| Rm11-15-UR                                                    | CACGATTTGGCGTCTGAAAC                   |
| Rm10-12-DF                                                    | GGCATGGTTTCAGACTCCCCCTCGTGGGGTTGA      |
| Rm10-12-UR                                                    | TCAACCCCACGAGGGGGAGTCTGAAACCATGCC      |
| Rm13-15-DF                                                    | ATGGTTTCAGACGAAAAATCGTGGGGTTGAAGC      |

---

|            |                                               |
|------------|-----------------------------------------------|
| Rm13-15-UR | GCTTCAACCCCACGATTTTTCGTCTGAAACCAT             |
| Rm16-30-R  | CGGGGTACCTAGGACCAAAACATCGGGTTCGTCTGAAAC       |
| Rm18-22-R  | CGGGGTACCGCTTCAACGGAGAGAGGGTTCGTCTGAAAC       |
| Rm23-30-R  | CGGGGTACCATCCTGGTCCCACGAGGGTTCGTCTGAAAC       |
| Rm26-30-R  | CGGGGTACCTAGGAAACCCCACGAGGGTTCGTCTGAAAC       |
| Rm21-25-R  | CGGGGTACCGCTTCCCAAACACGAGGGTTCGTCTGAAAC       |
| Rm16-20-R  | CGGGGTACCGCTTCAACCCACATCGGGTTCGTCTGAAAC       |
| Rm16-17-R  | CGGGGTACCGCTTCAACCCCACTCGGGTTTCGTCTGAAAC      |
| Rm-GT-R    | CGGGGTACCGCTTCAACCCAACTCGGGTTCGTCTGAAAC       |
| Dup6-R     | CGGGGTACCGCTTCAACCCCACGAGGGTTCGTCTTGAAC       |
| Del6-R     | CGGGGTACCGCTTCAACCCCACGAGGGTTCGTCTGAAAC       |
| Dup6-7-R   | CGGGGTACCGCTTCAACCCCACGAGGGTTCGTCTCTGAAAC     |
| Del6-7-R   | CGGGGTACCGCTTCAACCCCACGAGGGTTCGTCTGAAAC       |
| Del8-9-R   | CGGGGTACCGCTTCAACCCCACGAGGGTTCCTGAAAC         |
| Dup8-9-R   | CGGGGTACCGCTTCAACCCCACGAGGGTTCGTCTGAAAC       |
| Dup16-R    | CGGGGTACCGCTTCAACCCCACGAAGGGTTCGTCTGAAAC      |
| Del16-R    | CGGGGTACCGCTTCAACCCCACGGGGTTCGTCTGAAAC        |
| Dup16-17-R | CGGGGTACCGCTTCAACCCCACGAGAGGGTTCGTCTGAAAC     |
| Dup18-R    | CGGGGTACCGCTTCAACCCCACCGAGGGTTCGTCT           |
| Dup19-R    | CGGGGTACCGCTTCAACCCCAACGAGGGTTCGTCT           |
| Dup20-R    | CGGGGTACCGCTTCAACCCCACGAGGGTTCGTCT            |
| Dup21-25-R | CGGGGTACCGCTTCAACCCAACCCCACGAGGGTTCGTCT       |
| Del21-25-R | CGGGGTACCGCTTCCACGAGGGTTCGTCT                 |
| Ins3-R     | CGGGGTACCGCTTCAACCCCACGGAGAGGGTTCGTCTGAAAC    |
| Ins4-R     | CGGGGTACCGCTTCAACCCCACGAGAGAGGGTTCGTCTGAAAC   |
| Ins5-R     | CGGGGTACCGCTTCAACCCCACAGAGAGAGGGTTCGTCTGAAAC  |
| Ins6-R     | CGGGGTACCGCTTCAACCCCACGAGAGAGAGGGTTCGTCTGAAAC |

<sup>a</sup> Forward and reverse primers are indicated with letters F and R, respectively. During the bridge PCR procedure, the UF (upstream forward)/UR (upstream reverse) and DF (downstream forward)/DR (downstream reverse) primer pairs were used to amplify the upstream and downstream fragments, respectively.

<sup>b</sup> Designed restriction sequences are underlined. Mutated (or inserted) nucleotides are shown in bold and italic.

**Table S3.** Spacers that were acquired from the HHPV-2 genome by different a-CRISPR constructs

| Spacer ID <sup>a</sup> | Spacer sequences (5'–3')             | Positions <sup>b</sup> | Strand <sup>c</sup> | PAM 5'–3' |
|------------------------|--------------------------------------|------------------------|---------------------|-----------|
| DF60PA_1.1             | TTCGGATCGTGGAATGAAGATGAGTCGTTCCCTGAA | 7014-7049              | +                   | TTC       |
| DF60PA_2.1             | GGAAAACGTTAGATACTGACGTTGCGTCTGAAGCTA | 6451-6486              | +                   | TTC       |
| DF60PA_3.1             | AGGGAACGACTCATCTTCATTCCACGATCCGAAGA  | 7046-7012              | -                   | TTC       |

|            |                                       |           |   |     |
|------------|---------------------------------------|-----------|---|-----|
| DF60PA_3.2 | CTTTTTGCGTATTGGACGCCACATGGTAGCCGCC    | 1162-1128 | - | TTC |
| DF60PA_3.3 | AGACGAGGCGAACGCAGCGAGGAACGTACCCATCGA  | 2841-2806 | - | TTC |
| DF60PA_4.1 | TCATCCATCACGTAGCGCAGCGAACGACCAGCACCA  | 737-702   | - | TTC |
| DF60PA_5.1 | ATCGAGATCCGCAGCGAACTCATCATCTTGCAGCTC  | 6066-6031 | - | TTC |
| DF60PA_5.2 | CCAGTGGGGAATTGACCAGTCATCTCCTGCGCGA    | 1359-1392 | + | TTC |
| DF60PA_5.3 | GCTATATGGCTGGCCGTACGGTTGATCCGGAGCGG   | 5286-5320 | + | TTC |
| DF60PA_6.1 | GCTATATGGCTGGCCGTACGGTTGATCCGGAGCGG   | 5286-5320 | + | TTC |
| DF60PA_6.2 | ACTCCGTTAGCAAAACGCTTTGCGAAACTGAACG    | 6873-6906 | + | TTC |
| DF60PA_7.1 | ATACACAAGCACAGGACACCTCCCGCGGACCCACAG  | 7458-7423 | - | TTC |
| DF60PA_7.2 | AATACATCGGTCCTGCGCTGCTGATCGTTGGCTGCG  | 6171-6206 | + | TTC |
| DF60PA_8.1 | CGCGATCTCCCGAGCGTGATCAACTGGGGGCCGA    | 672-639   | - | TTC |
| DF60PA_8.2 | GGATAGTTGAGCACGTTGGTAATGATGTGTCTGCCTG | 7982-8018 | + | TTC |
| TATAm_6.3  | CCTCGGTCAGAATAGGCTGCGTTCGCTGCTCTGGT   | 7297-7331 | + | TTC |
| TATAm_7.1  | AGCGAACAGACCAGCTCGCAGGTTCCACGACCACGG  | 7157-7122 | - | TTC |
| TATAm_7.2  | CTTTTTGCGTATTGGACGCCACATGGTAGCCGCC    | 1162-1127 | - | TTC |
| TATAm_7.3  | CACGACCACGGCGCAGAATCATCAGGATCATAACGC  | 7132-7098 | - | TTC |
| TATAm_1.1  | TTGATGCGGTTTCACTACTGTCCGATGCGCGAGCGG  | 7481-7516 | + | TTC |
| TATAm_2.1  | GCTGAATTACAGTGAGCGTCGTAAGATGTTGCTG    | 2470-2504 | + | TTC |
| TATAm_2.2  | GTCTGCTGCGGTGGTGATCGGCGTGGATACCGTCCG  | 7237-7272 | + | TTC |
| TATAm_2.3  | AATACATCGGTCCTGTGCTGCTGATCGTTGGCTG    | 6171-6204 | + | TTC |
| TATAm_2.4  | TTTCGACAGACCACGACGGGGCCGGGTATAGCGAACG | 1698-1662 | - | TTC |
| TATAm_3.1  | GAAC TTCAGACCCGAGCGCAGTATCAGCGAACGT   | 6450-6417 | - | TTC |
| TATAm_3.2  | CTGATTCGTACGTGCTGCCGTCTTGCACGTGTTG    | 3753-3719 | - | TTC |
| TATAm_3.3  | CGCGATCTCCCGAGCGTGATCAACTGGGGGCCGA    | 672-639   | - | TTC |
| TATAm_4.1  | TTGATGCGGTTTCACTACTGTCCGATGCGCGAGCGG  | 7481-7516 | + | TTC |
| TATAm_5.1  | GGAAAACGTTAGATACTGACGTTGCGTCTGAAGCTA  | 6453-6486 | + | TTC |
| TATAm_5.2  | TTTAAGAGCGAGCCTGAGGTTGCTGAGTTCTTCGG   | 6984-7018 | + | TTC |
| TATAm_5.3  | AACATATTCACGGACCCGATCAACGACCGACTCAGG  | 2088-2053 | - | TTC |
| TATAm_6.1  | CGCTCGCACTGGCCGGTGTGCTCTGGCCGGTGTCTG  | 3181-3216 | + | TTC |
| TATAm_6.2  | TCATCCATCACGTAGCGCAGCGAACGACCAGCACCA  | 737-702   | - | TTC |
| JCm_1.1    | GACCCGCGCCAACGGGTATGAGTTTGCGGCGTTCAA  | 7714-7749 | + | TTC |
| JCm_2.1    | AGGTGACGAATCAGTACCGCCACCATCAGCAGCAA   | 1446-1412 | - | TTC |
| JCm_3.1    | TTGATGCGGTTTCACTACTGTCCGATGCGCGAGCGG  | 7481-7516 | + | TTC |
| JCmT_1.1   | ACTCCGTTAGCAAAACGCTTTGCGAAACTGAACGT   | 6873-6907 | + | TTC |
| JCmT_1.2   | AAGCATAAAGGCAATGACCGCGTTTCTGAAGTGCG   | 7748-7782 | + | TTC |
| JCmT_2.1   | TTCGGATCGTGGAATGAAGATGAGTCGTTCCCTGA   | 7014-7048 | + | TTC |
| JCmT_3.1   | AAGCATAAAGGCAATGACCGCGTTTCTGAAGTGCG   | 7748-7782 | + | TTC |
| JCmT_4.1   | AGGATCAGACCGCATACCATACTCGAGACGCAGCGT  | 408-373   | - | TTC |
| JCmT_5.1   | AAGCATAAAGGCAATGACCGCGTTTCTGAAGTGCG   | 7748-7782 | + | TTC |
| JCmG_1.1   | ACTCCGTTAGCAAAACGCTTTGCGAAACTGAACGT   | 6873-6907 | + | TTC |

|             |                                       |           |   |     |
|-------------|---------------------------------------|-----------|---|-----|
| JcMg_2.1    | CGGTATGTGGCTCACCTTGAGTCCACCGGACCCAC   | 796-762   | - | TTC |
| Rm1-5T_1.1  | ACTATCGAAACACAGGCGTTTACGATTATTTCGGTCT | 5866-5901 | + | TTC |
| Rm1-5T_2.1  | GTCGAGAATGCGATTGCTGATGCTGATTCTGGTCCGG | 6378-6414 | + | TTC |
| Rm1-5T_3.1  | ACTCCGTTAGCAAAACGCTTTGCGAAACTGAACGT   | 6873-6907 | + | TTC |
| Rm1-5T_4.1  | TTGATGCGGTTTCACTACTGTCCGATGCGCGAGC    | 7481-7514 | + | TTC |
| Rm1-5T_5.1  | GCTGTCTTTCGTCGAGAATGCGATTGCTGATGCTG   | 6368-6402 | + | TTC |
| Rm1-5T_6.1  | GTCGAGAATGCGATTGCTGATGCTGATTCTGGTCCGG | 6378-6414 | + | TTC |
| Rm1-5T_7.1  | ACTATCGAAACACAGGCGTTTACGATTATTTCGGTCT | 5866-5901 | + | TTC |
| Rm1-5_1.1   | GCCAAACACAGCTCGAGCTGCAAGAAGAGTCTCAAT  | 4483-4518 | + | TTC |
| Rm1-5_2.1   | AGGTGACGAATCAGTACCGCCACCATCAGCAGCAA   | 1446-1412 | - | TTC |
| Rm1-5_3.1   | GCTGATACTGCGCTCGGGTCTGAAGTTCGGAAAA    | 6423-6456 | + | TTC |
| Rm1-5_4.1   | GCTATATGGCTGGCCGTACGGTTGATCCGGAGCGG   | 5286-5320 | + | TTC |
| Rm1-5G_1.1  | GCAGACCACGACGGGGCCGGGTATAGCGAACGG     | 1694-1661 | - | TTC |
| Rm1-5G_2.1  | GCGCTCTAAAGCCTTCAGCCGCGCTCGCTCTTTATC  | 498-463   | - | TTC |
| Rm1-5G_3.1  | AAGCGATTGGCTACGTTGCCTTTCTTTAAGAGCGA   | 6960-6994 | + | TTC |
| Rm1-5G_4.1  | GCTATATGGCTGGCCGTACGGTTGATCCGGAGCGG   | 5286-5320 | + | TTC |
| Rm1-3_1.1   | CGGTATGTGGCTCACCTTGAGTCCACCGGACCCACTG | 796-760   | - | TTC |
| Rm1-3_2.1   | CCTCGGTCAGAATAGGCTGCGTTCGCTGCTCTGGTT  | 7297-7332 | + | TTC |
| Rm1-3_3.1   | GACTTGTCCGGTCTGTCGCTCGGTGGCATAACCCGG  | 4536-4570 | + | TTC |
| Rm4-6_1.1   | GTGGGACGCTTGATCCTGATGCTGATGAACAGCGT   | 7782-7816 | + | TTC |
| Rm4-6_2.1   | TTCGGATCGTGGAATGAAGATGAGTCGTTCCCTG    | 7014-7047 | + | TTC |
| Rm4-6_2.2   | ACTCCGTTAGCAAAACGCTTTGCGAAACTGAACGT   | 6873-6907 | + | TTC |
| Rm4-6_2.3   | ACTCCGTTAGCAAAACGCTTTGCGAAACTGAACGTG  | 6873-6908 | + | TTC |
| Rm4-6_3.1   | TCAGTCGCATCAGTCCCATCAACCAGAGACAGAGAC  | 3703-3668 | - | TTC |
| Rm4-6_3.2   | AAGCATAAAGGCAATGACCGCGTTTCTGAAGTGCG   | 7748-7782 | + | TTC |
| Rm4-6_3.3   | AGCGAATACGGACGCTCTTTTTCGCCCAGCTCAACA  | 2472-2437 | - | TTC |
| Rm6-10_1.1  | ACTCCGTTAGCAAAACGCTTTGCGAAACTGAACGT   | 6873-6907 | + | TTC |
| Rm6-10_2.1  | AGGATCAGACCGCATACCATACTCGAGACGCAGCGTG | 408-372   | - | TTC |
| Rm6-10_3.1  | AGCTCGTCTCGAAGGTGATGAGGCTGTGCTGGTGCTT | 4951-4987 | + | TTC |
| Rm6-10_4.1  | GCTGATACTGCGCTCGGGTCTGAAGTTCGGAAAACG  | 6423-6458 | + | TTC |
| Rm6-10_5.1  | ACTCCGTTAGCAAAACGCTTTGCGAAACTGAACGTG  | 6873-6908 | + | TTC |
| Rm6-10_6.1  | TTTAAGAGCGAGCCTGAGGTTGCTGAGTTCTTCGG   | 6984-7018 | + | TTC |
| Rm6-10_7.1  | AGCCGCGCTCGCTCTTTATCCTGATACGCAGCCATC  | 482-447   | - | TTC |
| Rm6-10_8.1  | GCTGATACTGCGCTCGGGTCTGAAGTTCGGAAAA    | 6423-6456 | + | TTC |
| Rm6-10_9.1  | CTTTTTGCGTATTGGACGCCACATGGTAGCCGCC    | 1162-1127 | - | TTC |
| Rm6-10_10.1 | CTCAATCACCTCCTCACCGGCATCCGGGTTTATCCAC | 2395-2359 | - | TTC |
| Rm6-10_11.1 | AAGCATAAAGGCAATGACCGCGTTTCTGAAGTGCG   | 7748-7782 | + | TTC |
| Rm6-10_11.2 | GTCTGCTGCGGTGGTGATCGGCGTGATACCGTTCG   | 7237-7271 | + | TTC |
| Rm10-12_1.1 | GCTGATCGGTGGTCCGTGGTCTGCTGGTGACGCTA   | 5191-5225 | + | TTC |
| Rm10-12_2.1 | CTTTCGATTGTGCTGTCGCTTGATCGGGTCCG      | 5407-5440 | + | TTC |

|              |                                        |           |   |      |
|--------------|----------------------------------------|-----------|---|------|
| Rm10-12_3.1  | GGAAAACGTTAGATACTGACGTTGCGTCTGAAGCTA   | 6451-6486 | + | TTC  |
| Rm10-12_4.1  | GCTATATGGCTGGCCGTACGGTTGATCCGGAGCGG    | 5286-5320 | + | TTC  |
| Rm10-12_5.1  | TCAGTCGCATCAGTCCCATCAACCAGAGACAGAG     | 3703-3670 | - | TTC  |
| Rm10-12_6.1  | AGAAAGGTACGACGTACGGCCCGACGACGTGGGATG   | 4195-4230 | + | TTC  |
| Rm10-12_7.1  | GGTAAATAGAGGTATCCAAAATGCAATTTTTTAAAAT  | 4617-4653 | + | TTC  |
| Rm10-12_8.1  | GACTTGTCCGGTCTGTGCTCGGTGGCATAACCCGG    | 4536-4570 | + | TTC  |
| Rm10-12_9.1  | AATACATCGGTCCTGCGCTGCTGATCGTTGGCTGCG   | 6171-6206 | + | TTC  |
| Rm10-12_10.1 | ATTACAACAGTCGCGCCCGACGCTGCGACCGTGCAG   | 234-199   | - | TTC  |
| Rm16-30_1.1  | GACGAGGCGAACGCAGCGAGGAACGTACCCATCG     | 2840-2807 | - | TTCA |
| Rm16-30_2.1  | CGACTGAGGATATTGTTGATCCGATCACGGCGG      | 3976-4008 | + | TTC  |
| Rm16-30_3.1  | CTGTTGGTGAGGGTCCCACCCACAAACCCACCCA     | 7361-7395 | + | TTC  |
| Rm16-30_4.1  | TCGATCACCGTGCGAAACGTGCGCCGCGCTCGCCT    | 920-887   | - | TTC  |
| Rm16-30_4.2  | TCATCCATCACGTAGCGCAGCGAACGACCAGCACC    | 737-703   | - | TTC  |
| Rm16-30_5.1  | CGCGATCTCCCGAGCGTGATCAACTGGGGGCCGACC   | 672-637   | - | TTC  |
| Rm16-30_5.2  | GCTATATGGCTGGCCGTACGGTTGATCCGGAGCGGG   | 5286-5321 | + | TTC  |
| Rm16-30_6.1  | GGATAGTTGAGCACGTTGGTAATGATGTGTCTGCCT   | 7982-8017 | + | TTC  |
| Rm16-30_7.1  | GGTCTGTGTCTCTACTGCTACGTTTCTGAAACTGA    | 7883-7917 | + | TTC  |
| Rm16-30_8.1  | CAGCTGGGTATTGTAATGAGTCAGAATGTTCTGCTG   | 3551-3516 | - | TTC  |
| Rm16-30_9.1  | CCACCCACAAACCCACCCACCCACAGGACACCGGA    | 7377-7411 | + | TTC  |
| Rm18-22_1.1  | TTGATGCGGTTTCACTACTGTCCGATGCGCGAGCGG   | 7481-7516 | + | TTC  |
| Rm18-22_2.1  | AGTGGTGAGTTGACTGCGCTCGAGGAAACACAGTCG   | 7062-7097 | + | TTC  |
| Rm18-22_3.1  | TGAAACTGAATCGTCTGTTCGGGAGTGGTCTGA      | 7909-7944 | + | TTC  |
| Rm18-22_4.1  | GGAAAACGTTAGATACTGACGTTGCGTCTGAAGCTA   | 6451-6486 | + | TTC  |
| Rm18-22_5.1  | GCTGAAGATATGAGTTGGTCCGAGCTGCTCGAAGA    | 7155-7189 | + | TTC  |
| Rm18-22_6.1  | CGGCAGCGGGTGGATAAACCCGGATGCCGGTGAGGA   | 2350-2385 | + | TTC  |
| Rm18-22_6.2  | GGTCTGCTGCTCGGTCCTGTGTGATGTCCGTCGTGC   | 5897-5932 | + | TTC  |
| Rm18-22_7.1  | CGCTTGATAACAGTTGGATGGCTGCGTATCAGGAT    | 431-465   | + | TTC  |
| Rm18-22_8.1  | TGACTCATTACAATACCCAGCTGGAACAGGTGAAA    | 3529-3563 | + | TTC  |
| Rm23-30_1.1  | GAAGAGGGCACGCTGCCTGATCACGGTGAGTCGCTG   | 5941-5976 | + | TTC  |
| Rm23-30_2.1  | GAAGAGGGCACGCTGCCTGATCACGGTGAGTCGCT    | 5941-5975 | + | TTC  |
| Rm23-30_3.1  | GTGCTGATCGATGAGGGCAGCACGCACTTCGATGCT   | 6804-6839 | + | TTC  |
| Rm23-30_4.1  | AGGATCAGACCCGCATACCATACTCGAGACGCAGCG   | 408-374   | - | TTC  |
| Rm23-30_5.1  | CAGTCAGACGCCGTTTGTGCGAGATCATGTGCATCA   | 989-954   | - | TTC  |
| Rm23-30_5.2  | TGCTGAATAGCAGCGAAATACTCATTTATCGATGA    | 3520-3486 | - | TTC  |
| Rm23-30_6.1  | GTGGGACGCTTGATCCTGATGCTGATGAACAGCGTT   | 7782-7817 | + | TTC  |
| Rm23-30_7.1  | GGTAAATAGAGGTATCCAAAATGCAATTTTTTAAAATA | 4617-4654 | + | TTC  |
| Rm23-30_8.1  | CGCTCGCACTGGCCGGTGTGCTCTGGCCGGTGCTG    | 3181-3216 | + | TTC  |
| Rm23-30_9.1  | GTCTGCTGCGGTGGTGATCGGCGTGGATAACCGTCGC  | 7237-7272 | + | TTC  |
| Rm23-30_10.1 | CGCGATCTCCCGAGCGTGATCAACTGGGGCCGA      | 672-639   | - | TTC  |
| Rm23-30_11.1 | GTGGGACGCTTGATCCTGATGCTGATGAACAGCGT    | 7782-7816 | + | TTC  |



|              |                                         |           |   |      |
|--------------|-----------------------------------------|-----------|---|------|
| Rm23-30_12.1 | CGACTGAGGATATTGTTGATCCGATCACGGCGG       | 3976-4008 | + | TTC  |
| Rm26-30_1.1  | CCACCCACAAACCCACCCACCCACAGGACACCGGA     | 7377-7411 | + | TTC  |
| Rm26-30_2.1  | GCTGTCTTTCGTCGAGAATGCGATTGCTGATGCTG     | 6368-6402 | + | TTC  |
| Rm26-30_3.1  | GCTATATGGCTGGCCGTACGGTTGATCCGGAGCGG     | 5286-5320 | + | TTC  |
| Rm26-30_3.2  | GCTGATACTGCGCTCGGGTCTGAAGTTCGGAAAACG    | 6423-6458 | + | TTC  |
| Rm26-30_4.1  | TCATCCATCACGTAGCGCAGCGAACGACCAGCACCA    | 737-702   | - | TTC  |
| Rm26-30_5.1  | AGGGGCAACAGCAGAATCAGGTATCGGAACGTCAC     | 1641-1607 | - | TTC  |
| Rm26-30_6.1  | AAGCATAAAGGCAATGACCGCGTTTCTGAAGTGCGT    | 7748-7783 | + | TTC  |
| Rm26-30_7.1  | TTGATGCGGTTTCACTACTGTCCGATGCGCGA        | 7481-7512 | + | TTC  |
| Rm26-30_8.1  | GCGCTTTTCTGTGTCGAGCCAGACGAATCTTCAACAGT  | 288-253   | - | TTC  |
| Rm26-30_9.1  | CGCGATCTCCCGAGCGTGATCAACTGGGGGCCGACCG   | 672-636   | - | TTC  |
| Rm21-25_1.1  | GTTCTCGCTTAGTAGCGGAGCATAACGCTGACTACTC   | 3803-3838 | + | TTC  |
| Rm21-25_2.1  | TTGATGCGGTTTCACTACTGTCCGATGCGCGAGCGG    | 7481-7516 | + | TTC  |
| Rm21-25_3.1  | GTTACCCCGGGGGCTATCGCTTATAAGGTAGTA       | 2226-2258 | + | TTC  |
| Rm21-25_4.1  | GCGCTTTTCTGTGTCGAGCCAGACGAATCTTCAACAGTG | 288-252   | - | TTC  |
| Rm21-25_4.2  | GCCTCGTCTGAAACTCGGTTCGTTGACCGGTACGA     | 2833-2867 | + | TTC  |
| Rm21-25_5.1  | TCTGCTGGCTGCGTTGATCGTCGTGTACCTCTGCGC    | 6720-6756 | + | TTC  |
| Rm21-25_6.1  | AACATATTCACGGACCCGATCAACGACCGACTCAGG    | 2088-2053 | - | TTC  |
| Rm21-25_6.2  | GGAAAACGTTAGATACTGACGTTGCGTCTGAAGCT     | 6451-6485 | + | TTC  |
| Rm21-25_7.1  | CGCGATCTCCCGAGCGTGATCAACTGGGGGCCGACC    | 672-637   | - | TTC  |
| Rm21-25_7.2  | GATTGTTGCTGTGCTCTTGATCGGGTCCGGTCTGAT    | 5412-5447 | + | TTC  |
| Rm21-25_8.1  | GTGGGACGCTTGATCCTGATGCTGATGAACAGCGTTG   | 7782-7818 | + | TTC  |
| Rm21-25_9.1  | CCTGAAGATCGCCTTTTCAGTGGTGAGTTGACTGC     | 7044-7078 | + | TTC  |
| Rm16-20_1.1  | CCCACTGGGAACCGCAGGCAGTACACACGACATTGA    | 1366-1331 | - | TTC  |
| Rm16-20_2.1  | ACGAATAAGAAGATTACTGATGGCAGTGGAATG       | 4149-4182 | + | TTC  |
| Rm16-20_3.1  | GTGGGACGCTTGATCCTGATGCTGATGAACAGC       | 7782-7814 | + | TTC  |
| Rm16-20_4.1  | TTTAAGAGCGAGCCTGAGGTTGCTGAGTTCTTCGGAT   | 6984-7020 | + | TTC  |
| Rm16-20_5.1  | ACTCCGTTAGCAAAAACGCTTTGCGAAACTGAACGT    | 6873-6907 | + | TTC  |
| Rm16-20_6.1  | GTGGGACGCTTGATCCTGATGCTGATGAACAGC       | 7782-7814 | + | TTC  |
| Rm16-20_7.1  | ACTCCGTTAGCAAAAACGCTTTGCGAAACTGAACGT    | 6873-6907 | + | TTC  |
| Rm16-20_7.2  | AGGATGAGCTGGGCGAGCTGCAAGATGATGAGTTCGC   | 6017-6053 | + | TTC  |
| Rm16-20_8.1  | GCTGATCGGTGGTCCGTGGTTCGTCTGGTGACGCTA    | 5191-5225 | + | TTC  |
| Rm16-20_9.1  | TGCTACCCGCTCCGGATCAACCGTACGGCCAGCC      | 5326-5293 | - | TTCA |
| Rm16-20_10.1 | AGGATCAGACCCGCATACCATACTCGAGACGCAGCGTG  | 408-372   | - | TTC  |
| Rm16-17_1.1  | GCTATATGGCTGGCCGTACGGTTGATCCGGAGCGGG    | 5286-5321 | + | TTC  |
| Rm16-17_2.1  | GCTATATGGCTGGCCGTACGGTTGATCCGGAGCGG     | 5286-5320 | + | TTC  |
| Rm16-17_3.1  | CTTTCGATTGTTGCTGTGCTCTTGATCGGGTCCGG     | 5407-5441 | + | TTC  |
| Rm16-17_4.1  | TGAAACTGAATCGTCGTCTGTTCCGGAGTGGTCTG     | 7909-7943 | + | TTC  |
| Rm16-17_5.1  | ATTACAACAGTCGCGCCGACGCTGCGACCGTGCA      | 234-200   | - | TTC  |
| Rm16-17_6.1  | ATTACAACAGTCGCGCCGACGCTGCGACCGTGCA      | 234-199   | - | TTC  |

|              |                                       |           |   |     |
|--------------|---------------------------------------|-----------|---|-----|
| Rm16-17_7.1  | GATTGTTGCTGTCTGATCGGGTCCGGTCTG        | 5412-5445 | + | TTC |
| Rm16-17_8.1  | ACTCCGTTAGCAAAACGCTTTGCGAAACTGAACGT   | 6873-6907 | + | TTC |
| Rm16-17_9.1  | CCCACTGGGAACCGCAGGCAGTACACACGACATTG   | 1366-1332 | - | TTC |
| Rm16-17_10.1 | TCATCCATCACGTAGCGCAGCGAACGACCAGCAC    | 737-704   | - | TTC |
| Rm16-17_11.1 | CTCAAGGTTGGCAAGAACATGCAGTTAGAAGAGAT   | 5719-5753 | + | TTC |
| Rm-GT_1.1    | CGACTGAGGATATTGTTGATCCGATCACGGCGGCG   | 3976-4010 | + | TTC |
| Rm-GT_2.1    | GCTATATGGCTGGCCGTACGGTTGATCCGGAGCGGG  | 5286-5321 | + | TTC |
| Rm-GT_3.1    | CGGTATGTGGCTCACCTTGAGTCCACCGGACCCACTG | 796-760   | - | TTC |
| Rm-GT_4.1    | TTGATGCGGTTTCACTACTGTCCGATGCGCGAGCAG  | 7481-7516 | + | TTC |
| Rm-GT_5.1    | GTGAGACACTTGATCCTGATGCTGATGAACAGCGT   | 7782-7816 | + | TTC |
| Rm-GT_6.1    | CGGCAGCGGGTGGATAAACCCGGATGCCGGTGAGG   | 2350-2384 | + | TTC |
| Rm-GT_7.1    | GCTGAAGATATGAGTTGGTCGGAGCTGCTCGAAGA   | 7155-7189 | + | TTC |
| Rm-GT_8.1    | AGGATCAGACCGCATACCATACTCGAGACGCAGCGT  | 408-373   | - | TTC |
| Rm-GT_9.1    | CTGTTGGTGAGGGTCCCACCCACAAACCCACCCA    | 7361-7395 | + | TTC |
| Rm-GT_10.1   | GTGCTGATCGATGAGGGCAGCACGCACTTCGATGCTC | 6804-6840 | + | TTC |
| Rm-GT_11.1   | GCTATACCCGGCCCCCGTCGTGGTCTGCGAAAGAAG  | 1667-1702 | + | TTC |
| Dup6_1.1     | CGTCGCGCAAAGCGGACAGGTATCAGGCTCAGTG    | 1575-1542 | - | TTC |
| Dup6_2.1     | TGAAACTGAATCGTCGTCTGTTCCGGAGTGGTCTG   | 7909-7943 | + | TTC |
| Dup6_3.1     | ACGCCGATTAGTCCGAGCATCGAAGTGCCTGCTG    | 6854-6821 | - | TTC |
| Dup6_4.1     | CGAGCAGGACTGTCAGTCGCAGGCAACCAAGCAAC   | 1934-1900 | - | TTC |
| Dup6_5.1     | GCTATATGGCTGGCCGTACGGTTGATCCGGAGCG    | 5286-5319 | + | TTC |
| Dup6_6.1     | CTTGTGCAGCGACAGGGGCAACGCCGCCGATCAG    | 4715-4682 | - | TTC |
| Dup6_7.1     | AGGTGACGAATCAGTACCGCCACCATCAGCAGCAACA | 1446-1410 | - | TTC |
| Dup6_8.1     | ACTCCGTTAGCAAAACGCTTTGCGAAACTGAACG    | 6873-6906 | + | TTC |
| Dup6_9.1     | GACTTGTCCGGTCTGTCTGCTCGGTGGCATAACCCGG | 4536-4570 | + | TTC |
| Dup6_10.1    | TCGATCACCGTGCGAAACGTCGCCGCGCTCGCCTC   | 920-886   | - | TTC |
| Del6_1.1     | TTTCGACAGACCACGACGGGGCCGGGTATAGCGA    | 1698-1665 | - | TTC |
| Del6_2.1     | CGCGATCTCCCGAGCGTGATCAACTGGGGGCCGACC  | 672-637   | - | TTC |
| Del6_3.1     | ATTACAACAGTCGCGCCGACGCTGCGACCGTGCAG   | 234-199   | - | TTC |
| Del6_4.1     | AGGTGACGAATCAGTACCGCCACCATCAGCAGCAA   | 1446-1412 | - | TTC |
| Del6_5.1     | AATACATCGGTCCTGCGCTGCTGATCGTTGGCTGCGT | 6171-6207 | + | TTC |
| Del6_6.1     | GCTGATACTGCGCTCGGGTCTGAAGTTCGGAAAA    | 6423-6456 | + | TTC |
| Del6_7.1     | ATACAGTTTTTTGGAGAACACATTTACGCGCTCTT   | 324-290   | - | TTC |
| Del6_8.1     | GGAAAACGTTAGATACTGACGTTGCGTCTGAAGCTA  | 6453-6486 | + | TTC |
| Del6_9.1     | GGATAGTTGAGCACGTTGGTAATGATGTGTCTGCC   | 7982-8016 | + | TTC |
| Del6_10.1    | CGGTATGTGGCTCACCTTGAGTCCACCGGACCCACT  | 796-761   | - | TTC |
| Del6_11.1    | GCAGACCACGACGGGGGCCGGGTATAGCGAACGGA   | 1694-1660 | - | TTC |
| Del6_12.1    | TGGTCCGGCGACGTTTCGCTGATACTGCGCTCGGGT  | 6407-6441 | + | TTC |
| Dup16_1.1    | TTTGGGATTGTACGTGATCTTTCGCCGTCGTCGT    | 2599-2565 | - | TTC |
| Dup16_2.1    | TCGAGCAGGACTGTCAGTCGCAGGCAACCAAGCAAC  | 1935-1900 | - | TTC |
| Dup16_3.1    | ACACCAGCAGCAGCGCCAGCAGTCACACCAACGG    | 3124-3091 | - | TTC |

|               |                                        |           |   |     |
|---------------|----------------------------------------|-----------|---|-----|
| Dup16_4.1     | CTTTTTGCGTATTGGACGCCACATGGTAGCCG       | 1162-1130 | - | TTC |
| Dup16_5.1     | TCTGCTGGCTGCGTTGATCGTTCGTGTTACCTCTG    | 6720-6753 | + | TTC |
| Dup16_6.1     | AATACATCGGTCCTGCGCTGCTGATCGTTGGCTG     | 6171-6204 | + | TTC |
| Dup16_7.1     | ACTTGTATTCCCTCGGTCAGAATAGGCTGCGTTCGCTG | 7287-7324 | + | TTC |
| Dup16_8.1     | GCTGATCGGTGGTCCGTGGTCGTCTGGTGACGCTA    | 5191-5225 | + | TTC |
| Dup16_9.1     | ACTAAGCGAGTGACGTTGACTGATGCTGGTGCGT     | 5000-5033 | + | TTC |
| Dup16_10.1    | CGCTCGCACTGGCCGGTGTGCTCTGGCCGGTGCTG    | 3181-3216 | + | TTC |
| Dup16_11.1    | GCTATATGGCTGGCCGTACGGTTGATCCGGAGCGG    | 5286-5320 | + | TTC |
| Dup16_12.1    | CGGTATGTGGCTCACCTGAGTCCACCGGACCCACT    | 796-761   | - | TTC |
| Del16_1.1     | AATACATCGGTCCTGCGCTGCTGATCGTTGGCTGC    | 6171-6205 | + | TTC |
| Del16_2.1     | GCTATATGGCTGGCCGTACGGTTGATCCGGAGCGG    | 5286-5320 | + | TTC |
| Del16_3.1     | TCTTGTGCAGCGACAGGGCAACGCCGCCGATCAGC    | 4716-4681 | - | TTC |
| Del16_4.1     | GCTGATCGGTGGTCCGTGGTCGTCTGGTGACGCTA    | 5191-5225 | + | TTC |
| Del16_5.1     | ACTCCGTTAGCAAAACGCTTTGCGAAACTGAACGTG   | 6873-6908 | + | TTC |
| Del16_6.1     | GTGCTGATCGATGAGGGCAGCACGCACTTCGATGCT   | 6804-6839 | + | TTC |
| Del16_7.1     | GTCTGCTGCGGTGGTATCGGCGTGGATAACGTCGC    | 7237-7272 | + | TTC |
| Del16_8.1     | GCTGAAGATATGAGTTGGTCGGAGCTGCTCGAAGA    | 7155-7189 | + | TTC |
| Del16_9.1     | ACTCCGTTAGCAAAACGCTTTGCGAAACTGAACGT    | 6873-6907 | + | TTC |
| Del16_10.1    | GCTATATGGCTGGCCGTACGGTTGATCCGGGGCGG    | 5286-5320 | + | TTC |
| Dup16-17_1.1  | CTGGTGCTCGCCAGATTCATCGAGATCCGCAGCG     | 6084-6051 | - | TTC |
| Dup16-17_2.1  | GCTATATGGCTGGCCGTACGGTTGATCCGGAGCGG    | 5286-5320 | + | TTC |
| Dup16-17_3.1  | GGAAAACGTTAGATACTGACGTTGCGTCTGAAGCTA   | 6451-6486 | + | TTC |
| Dup16-17_4.1  | ATTACAACAGTCGCGCCGCAGCGTGCAGACCGTGCAG  | 234-199   | - | TTC |
| Dup16-17_5.1  | GGGAGCTGTCGGTAACTGGTCCTAACGGTAATCCG    | 5648-5682 | + | TTC |
| Dup16-17_6.1  | GCTATATGGCTGGCCGTACGGTTGATCCGGAGCGGG   | 5286-5321 | + | TTC |
| Dup16-17_7.1  | CGTCGCGCAAAGCGGACAGGTATCAGGCTCAGCGT    | 1575-1541 | - | TTC |
| Dup16-17_8.1  | GCGCTCTAAAGCCTTCAGCCGCGCTCGCTCTTTATC   | 498-463   | - | TTC |
| Dup16-17_9.1  | TCATCAGCCACTTTCATCGACGTAGCACCCCTCTT    | 3355-3322 | - | TTC |
| Dup16-17_10.1 | CGTCGCGCAAAGCGGACAGGTATCAGGCTCAGCG     | 1575-1542 | - | TTC |
| Dup18_1.1     | CTCAAGGTTGGCAAGAACATGCAGTTAGAAGAGATG   | 5719-5754 | + | TTC |
| Dup18_2.1     | GGTCTGTGTCTCTACTGCTACGTTTCTGAAACTG     | 7883-7916 | + | TTC |
| Dup18_3.1     | CTTTTTGCGTATTGGACGCCACATGGTATCCGC      | 1162-1129 | - | TTC |
| Dup18_4.1     | ATACAGTTTTTTGGAGAACACATTTACGCGCTCTT    | 324-290   | - | TTC |
| Dup18_5.1     | GTGCTGATCGATGAGGGCAGCACGCACTTCGATG     | 6804-6837 | + | TTC |
| Dup18_6.1     | AGGATGAGCTGGGCGAGCTGCAAGATAATGAGTTCGC  | 6017-6053 | + | TTC |
| Dup18_7.1     | CGGTTTCCGTCTGATGACTTTCGGGAGCTGTCGGTA   | 5626-5661 | + | TTC |
| Dup18_8.1     | AAGCATAAAGGCAATGACCGGTTTCTGAAGTGCGT    | 7748-7783 | + | TTC |
| Dup18_9.1     | AGTGGTGAGTTGACTGCGCTCGAGGAAACACAGTCG   | 7062-7097 | + | TTC |
| Dup18_10.1    | GATTGTTGCTGTGCTCTTGATCAGGTCCGGTCCGATC  | 5412-5448 | + | TTC |
| Dup19_1.1     | GCTGAAGATATGAGTTGGTCGGAGCTGCTCGAAG     | 7155-7188 | + | TTC |
| Dup19_2.1     | TGACTCATTACAATACCCAGCTGGAACAGGTGAAA    | 3529-3563 | + | TTC |
| Dup19_2.2     | GTGGGACGCTTGATCCTGATGCTGATGAACAGCGT    | 7782-7816 | + | TTC |
| Dup19_3.1     | AGGATCAGACCGCATACCATACTCGAGACGCAGCGT   | 408-373   | - | TTC |

|               |                                         |           |   |     |
|---------------|-----------------------------------------|-----------|---|-----|
| Dup19_4.1     | CGGTATGTGGCTCACCTTGAGTCCACCGGACCCACTG   | 796-760   | - | TTC |
| Dup19_5.1     | TTGATGCGGTTTCACTACTGTCCGATGCGCGAGCGG    | 7481-7516 | + | TTC |
| Dup19_6.1     | GAACGTACGCACGACGGACATCACACAGGACCGAGC    | 5940-5905 | - | TTC |
| Dup19_7.1     | ATCGACGTAGCACCTCTTGGATTGCAGACTTAAGG     | 3340-3305 | - | TTC |
| Dup19_8.1     | CTACAAACCGTTGGTGTGACTGCTGGCGCTGCTG      | 3084-3117 | + | TTC |
| Dup19_9.1     | AGAAAGGTACGACGTACGACCCGACGACGTGGGAT     | 4195-4229 | + | TTC |
| Dup20_1.1     | CTACAAACCGTTGGTGTGACTGCTGGCGCTGCTGCT    | 3084-3119 | + | TTC |
| Dup20_2.1     | CCACCCACAAACCCACCCACCCACAGGACACCGGA     | 7377-7411 | + | TTC |
| Dup20_3.1     | GACTTGTCGGTCTGTCGCTCGGTGGCATAACCCG      | 4536-4569 | + | TTC |
| Dup20_4.1     | TCGATCACCGTGCGAAACGTCGCCGCGCTCGCCTCG    | 920-885   | - | TTC |
| Dup20_5.1     | TCTGCTGGCTGCGTTGATCGTTCGTGTTACCTCTG     | 6720-6753 | + | TTC |
| Dup20_6.1     | GTACACGTTGACCGGGCAGCATGCCGTTGTCGCGTCGA  | 2772-2809 | + | TTC |
| Dup20_7.1     | GAATCATTAGCGAGATATGCAGCAGCATACGAAGC     | 1088-1054 | - | TTC |
| Dup20_8.1     | ACTAATAAGAGGATTACTGATGGCTGTGGTAATGA     | 4149-4183 | + | TTC |
| Dup20_9.1     | CTAGTGCTCGCCAGATTCAACGAGCAACCGATCAGG    | 2010-1975 | - | TTC |
| Dup20_10.1    | TTAACACCGAGCCTAAAGGTGCTGAGTCTTCGG       | 6984-7018 | + | TTC |
| Dup21-25_1.1  | AGTGGTGAGTTGACTGCGCTCGAGGAAACACAGTCGG   | 7062-7098 | + | TTC |
| Dup21-25_2.1  | TCATCCATCACGTAGCGCAGCGAACGACCAGCACC     | 737-703   | - | TTC |
| Dup21-25_3.1  | TCGATCACCGTGCGAAACGTCGCCGCGCTCGCCTCGA   | 920-884   | - | TTC |
| Dup21-25_4.1  | TTTCGCAGACCACGACGGGGCCGGGTATAGCGAAC     | 1698-1663 | - | TTC |
| Dup21-25_5.1  | GCGCTTTTCTGTGTCGAGCCAGACGAATCTTCAACAGT  | 288-253   | - | TTC |
| Dup21-25_6.1  | GCGCTCTTGTTCAGGTGACGAATCAGTACCGCCACC    | 1458-1423 | - | TTC |
| Dup21-25_7.1  | CGGTATGTGGCTCACCTTGAGTCCACCGGACCCACT    | 796-761   | - | TTC |
| Dup21-25_8.1  | GACCCGCGCCAACGGGTATGAGTTTGC GGCGTTCAAGC | 7714-7751 | + | TTC |
| Dup21-25_9.1  | CGACTGAGGATATTGTTGATCCGATCACGGCGGC      | 3976-4009 | + | TTC |
| Dup21-25_10.1 | ACTCCGTTAGCAAACGCTTTGCGAAACTGAACGTG     | 6873-6908 | + | TTC |
| Dup21-25_11.1 | AGGGGCAACAGCAGAATCAGGTATCGGAACGTCACC    | 1641-1606 | - | TTC |
| Del21-25_1.1  | GAAGAGGGCACGCTGCCTGATCACGGTGAGTCGCTG    | 5941-5976 | + | TTC |
| Del21-25_2.1  | GTCGAGAATGCGATTGCTGATGCTGATTCTGGTCC     | 6378-6412 | + | TTC |
| Del21-25_3.1  | GGATAGTTGAGCACGTTGGTAATGATGTGTCTGCCTG   | 7982-8018 | + | TTC |
| Del21-25_4.1  | GGATAGTTGAGCACGTTGGTAATGATGTGTCTG       | 7982-8014 | + | TTC |
| Del21-25_5.1  | GTCTTGCGGTGATTGCTGCTGAGTCTGACTGCGGTA    | 8137-8172 | + | TTC |
| Del21-25_6.1  | GGATAGTTGAGCACGTTGGTAATGATGTGTCTGCCT    | 7982-8017 | + | TTC |
| Del21-25_7.1  | AGCAGAACATTCTGACTCATTACAATACCCAGCTG     | 3517-3551 | + | TTC |
| Del21-25_8.1  | GCCAAACACAGCTCGAGCTGCAAGAAGAGTCTCAA     | 4483-4517 | + | TTC |
| Del21-25_8.2  | CGTACCCGCCGACTTGCCGACGCTTTCGGTATG       | 823-790   | - | TTC |
| Del21-25_9.1  | TTGCGCGAGCGCGAGGTTGCTGTAATGCGATTGTCC    | 7562-7598 | + | TTC |
| Del21-25_10.1 | AGTGGTGAGTTGACTGCGCTCGAGGAAACACAGTCG    | 7062-7097 | + | TTC |
| Del21-25_11.1 | GCAGACCACGACGGGGCCGGGTATAGCGAACGGACA    | 1694-1658 | - | TTC |
| Ins3_1.1      | CGGTATGTGGCTCACCTTGAGTCCACCGGACCCA      | 796-763   | - | TTC |
| Ins3_2.1      | GCTGTCTTTCGTCGAGAATGCGATTGCTGATGCTG     | 6368-6402 | + | TTC |
| Ins3_3.1      | CGTACCCGCCGACTTGCCGACGCTTTCGGTATGTG     | 823-788   | - | TTC |
| Ins3_4.1      | AAGCATAAAGGCAATGACCGCGTTTCTGAAGTGCG     | 7748-7779 | + | TTC |

|           |                                      |           |   |     |
|-----------|--------------------------------------|-----------|---|-----|
| Ins3_5.1  | GAATCATTAGCGAGATATGCAGCAGCATAACGAAG  | 1088-1055 | - | TTC |
| Ins3_6.1  | GTGCTGATCGATGAGGGCAGCACGCACTTCGATG   | 6804-6837 | + | TTC |
| Ins3_7.1  | CCTCGGTCAGAATAGGCTGCGTTCGCTGCTCTGGTT | 7297-7332 | + | TTC |
| Ins3_8.1  | ACTCCGTTAGCAAAACGCTTTGCGAAACTGAACG   | 6873-6906 | + | TTC |
| Ins3_9.1  | AATACATCGGTCCTGCGCTGCTGATCGTTGGCTGC  | 6171-6205 | + | TTC |
| Ins3_10.1 | TTTAAGAGCGAGCCTGAGGTTGCTGAGTTCTTCGG  | 6984-7018 | + | TTC |

<sup>a</sup> Each spacer is designated with the mutant name followed by two numbers (separated by a dot). The first is the clone number, and the second indicates its location within the expanded array according to the leader (e.g. “DF60PA\_1.1” is the most recently acquired spacer in clone1 of DF60PA).

<sup>b</sup> The positions of protospacers (from which a spacer was derived) on the HHPV-2 genome.

<sup>c</sup> “+” and “-” correspond respectively to the coding strand and the template strand of the *rep* gene (ORF1).

## SUPPLEMENTARY DATA

**Data S1.** Sequencing results of different a-CRISPR constructs with spacer insertions.

**Note:** The mutated or inserted nucleotide(s) are in red, and the designed restriction sites (BamH1 and KpnI) are underlined. The sequences duplicated during spacer integration are framed, and duplication size may be normal (30 bp) or aberrant (29, 31, 32 or 33 bp) in different a-CRISPRs. The viral sequences from which new spacers derived are summarized in **Table S3**.

### <The wild-type a-CRISPR>

#### (1) DF60PA clones (30-bp normal duplication)

##### DF60PA\_clone1

GAAAATCACGGTTTCTTGCTATTGCCAGGATCCTCGGTTTCCGTCGACCCCCGGGGG  
GAAGCACCTTATTGATGGTCGACGGAAGGTCTTTACTGTGACCCGCCGTTAGCAGCCTT  
ATGGCCCGTATATCGGGCATGGTTTCAGACGAACCCTCGTGGGGTTGAAGCITTCGGATC  
GTGGAATGAAGATGAGTCGTTCCCTGAAGTTTCAGACGAACCCTCGTGGGGTTGAAG  
CGGTACCTTAGCGGAACTGATTCAGTCGCTGTTTGGCTGTTTCGCGGA

##### DF60PA\_clone2

GAAAATCACGGTTTCTTGCTATTGCCAGGATCCTCGGTTTCCGTCGACCCCCGGGGG  
GAAGCACCTTATTGATGGTCGACGGAAGGTCTTTACTGTGACCCGCCGTTAGCAGCCTT  
ATGGCCCGTATATCGGGCATGGTTTCAGACGAACCCTCGTGGGGTTGAAGCGGAAAAC  
GTTAGATACTGACGTTGCGTCTGAAGCTAGTTTCAGACGAACCCTCGTGGGGTTGAAG  
CGGTACCTTAGCGGAACTGATTCAGTCGCTGTTTGGTTGTTTCGCGG

##### DF60PA\_clone3

GAAAATCACGGTTTCTTGCTATTGCCAGGATCCTCGGTTTCCGTCGACCCCCGGGGG  
GAAGCACCTTATTGATGGTCGACGGAAGGTCTTTACTGTGACCCGCCGTTAGCAGCCTT  
ATGGCCCGTATATCGGGCATGGTTTCAGACGAACCCTCGTGGGGTTGAAGCAGGGAAC

GACTCATCTTCATTCCACGATCCGAAGA GTTTCAGACGAACCCTCGTGGGGTTGAAGC  
CTTTTTCGCTATTGGACGCCACATGGTAGCCGCC GTTTCAGACGAACCCTCGTGGGG  
TTGAAGCAGACGAGGCCGAACGCAGCGAGGAACGTACCCATCGA GTTTCAGACGAAC  
CCTCGTGGGGTTGAAGCGGTACCTTAGCGGAACTGATTCAGTCGCTGTTTGGTGTTC  
GCGGA

**DF60PA\_clone4**

GAAAATCACGGTTTCTTGCTATTGCCAGGATCCTCGGTTTCCGTCGACCCCCGGGGG  
GAAGCACCTTATTGATGGTCGACGGAAGGTCTTTACTGTGACCCGCCGTTAGCAGCCTT  
ATGGCCCGTATATCGGGCATG GTTTCAGACGAACCCTCGTGGGGTTGAAGCTCATCCAT  
CACGTAGCGCAGCGAACGACCAGCACCA GTTTCAGACGAACCCTCGTGGGGTTGAAG  
CGGTACCTTAGCGGAACTGATTCAGTCGCTGTTTGGTGGTTTCGCG

**DF60PA\_clone5**

GAAAATCACGGTTTCTTGCTATTGCCAGGATCCTCGGTTTCCGTCGACCCCCGGGGG  
GAAGCACCTTATTGATGGTCGACGGAAGGTCTTTACTGTGACCCGCCGTTAGCAGCCTT  
ATGGCCCGTATATCGGGCATG GTTTCAGACGAACCCTCGTGGGGTTGAAGCATCGAGA  
TCCGCAGCGAACTCATCATCTTGAGCTC GTTTCAGACGAACCCTCGTGGGGTTGAAG  
CCCAGTGGGGAATTGACCAGTCATCTCCTGCGCGA GTTTCAGACGAACCCTCGTGGG  
GTTGAAGCGCTATATGGCTGGCCGTACGGTTGATCCGGAGCGG GTTTCAGACGAACCC  
TCGTGGGGTTGAAGCGGTACCTTAGCGGAACTGATTCAGTCGCTGTTTGGTGG

**DF60PA\_clone6**

GAAAATCACGGTTTCTTGCTATTGCCAGGATCCTCGGTTTCCGTCGACCCCCGGGGG  
GAAGCACCTTATTGATGGTCGACGGAAGGTCTTTACTGTGACCCGCCGTTAGCAGCCTT  
ATGGCCCGTATATCGGGCATG GTTTCAGACGAACCCTCGTGGGGTTGAAGCGCTATATG  
GCTGGCCGTACGGTTGATCCGGAGCGG GTTTCAGACGAACCCTCGTGGGGTTGAAGC  
ACTCCGTTAGCAAACGCTTTGCGAACTGAACG GTTTCAGACGAACCCTCGTGGGG  
TTGAAGCGGTACCTTAGCGGAACTGATTCAGTCGCTGTTTGGTGGTTTCGCGGA

**DF60PA\_clone7**

GAAAATCACGGTTTCTTGCTATTGCCAGGATCCTCGGTTTCCGTCGACCCCCGGGGG  
GAAGCACCTTATTGATGGTCGACGGAAGGTCTTTACTGTGACCCGCCGTTAGCAGCCTT  
ATGGCCCGTATATCGGGCATG GTTTCAGACGAACCCTCGTGGGGTTGAAGCATACACA  
AGCACAGGACACCTCCCGCGGACCCACAG GTTTCAGACGAACCCTCGTGGGGTTGAA  
GCAATACATCGGTCCTGCGCTGCTGATCGTTGGCTGCG GTTTCAGACGAACCCTCGTG  
GGTTGAAGCGGTACCTTAGCGGAACTGATTCAGTCGCTGTTTGGTGG

**DF60PA\_clone8**

GAAAATCACGGTTTCTTGCTATTGCCAGGATCCTCGGTTTCCGTCGACCCCCGGGGG  
GAAGCACCTTATTGATGGTCGACGGAAGGTCTTTACTGTGACCCGCCGTTAGCAGCCTT  
ATGGCCCGTATATCGGGCATG GTTTCAGACGAACCCTCGTGGGGTTGAAGCCGCGATC  
TCCCAGCGTGATCAACTGGGGGCCGA GTTTCAGACGAACCCTCGTGGGGTTGAAGC  
GGATAGTTGAGCACGTTGGTAATGATGTGTCTGCCTG GTTTCAGACGAACCCTCGTGG  
GGTTGAAGCGGTACCTTAGCGGAACTGATTCAGTCGCTGTTTGGTGGG

**<The TATA-lacking mutant>**

**(2) TATAm clones (30-bp normal duplication)**

**TATAm\_clone1**

GAAAATCACGGTTTCTTGCTATTGCCAGGATCCTCGGTTTCCGTCGACCCCCGGGGG  
GAAGCACCTTATTGATGGTCGACGGAAGGTAGGGCAGTGTACCCGCCGTTAGCAGCCT  
TATGGCCCGTATATCGGGCATGGTTTCAGACGAACCCTCGTGGGGTTGAAGCTTGATGC  
GGTTTCACTACTGTCCGATGCGCGAGCGGGTTTCAGACGAACCCTCGTGGGGTTGAAG  
CGGTACCTTAGCGGAACTGATTCAGTCGCTGTTTGGTTGTTTCGCGGA

**TATAm\_clone2**

GAAAATCACGGTTTCTTGCTATTGCCAGGATCCTCGGTTTCCGTCGACCCCCGGGGG  
GAAGCACCTTATTGATGGTCGACGGAAGGTAGGGCAGTGTACCCGCCGTTAGCAGCCT  
TATGGCCCGTATATCGGGCATGGTTTCAGACGAACCCTCGTGGGGTTGAAGCGCTGAAT  
TACAGTGAGCGTCGTAAGATGTTTCGCTGGTTTCAGACGAACCCTCGTGGGGTTGAAGC  
GTCTGCTGCGGTGGTGATCGGCGTGGATACCGTCGCGTTTCAGACGAACCCTCGTGGG  
GTTGAAGCAATACATCGGTCCTGTGCTGCTGATCGTTGGCTGGTTTCAGACGAACCCT  
CGTGGGGTTGAAGCTTCGCAGACCACGACGGGGGCCGGGTATAGCGAACGGTTTCA  
GACGAACCCTCGTGGGGTTGAAGCGGTACCTTAGCGGAACTGATTCAGTCGCTGTTT  
CTGGTTTCGCGGAC

**TATAm\_clone3**

GAAAATCACGGTTTCTTGCTATTGCCAGGATCCTCGGTTTCCGTCGACCCCCGGGGG  
GAAGCACCTTATTGATGGTCGACGGAAGGTAGGGCAGTGTACCCGCCGTTAGCAGCCT  
TATGGCCCGTATATCGGGCATGGTTTCAGACGAACCCTCGTGGGGTTGAAGCGAACTT  
CAGACCCGAGCGCAGTATCAGCGAACGTGTTTCAGACGAACCCTCGTGGGGTTGAAG  
CCTGATTTCGTACGTGCTGCCGTCTTGCAGCGTGTGGTTTCAGACGAACCCTCGTGGG  
GTTGAAGCCGCGATCTCCCAGCGTGATCAACTGGGGGCCGAGTTTCAGACGAACC  
TCGTGGGGTTGAAGCGGTACCTTAGCGGAACTGATTCAGTCGCTGTTTGTGGGTTTC  
GCGGA

**TATAm\_clone4**

GAAAATCACGGTTTCTTGCTATTGCCAGGATCCTCGGTTTCCGTCGACCCCCGGGGG  
GAAGCACCTTATTGATGGTCGACGGAAGGTAGGGCAGTGTACCCGCCGTTAGCAGCCT  
TATGGCCCGTATATCGGGCATGGTTTCAGACGAACCCTCGTGGGGTTGAAGCTTGATGC  
GGTTTCACTACTGTCCGATGCGCGAGCGGGTTTCAGACGAACCCTCGTGGGGTTGAAG  
CGGTACCTTAGCGGAACTGATTCAGTCGCTGTTTGGCTGTTTCGCGG

**TATAm\_clone5**

GAAAATCACGGTTTCTTGCTATTGCCAGGATCCTCGGTTTCCGTCGACCCCCGGGGG  
GAAGCACCTTATTGATGGTCGACGGAAGGTAGGGCAGTGTACCCGCCGTTAGCAGCCT  
TATGGCCCGTATATCGGGCATGGTTTCAGACGAACCCTCGTGGGGTTGAAGCGGAAAA  
CGTTAGATACTGACGTTGCGTCTGAAGCTAGTTTCAGACGAACCCTCGTGGGGTTGAA  
GCTTTAAGAGCGAGCCTGAGGTTGCTGAGTTCTTCGGGTTTCAGACGAACCCTCGTGG  
GGTTGAAGCAACATATTCACGGACCCGATCAACGACCGACTCAGGGTTTCAGACGAA  
CCCTCGTGGGGTTGAAGCGGTACCTTAGCGGAACTGATTCAGTCGCTGTTTGGTGTT  
TCGCGG

**TATAm\_clone6**

GAAAATCACGGTTTCTTGCTATTGCCAGGATCCTCGGTTTCCGTCGACCCCCGGGGG  
GGAGCACCTTATTGATGGTCGACGGAAGGTAGGGCAGTGTACCCGCCGTTAGCAGCCT  
TATGGCCCGTATATCGGGCATGGTTTCAGACGAACCCTCGTGGGGTTGAAGCCGCTCG

CACTGGCCGGTGTCTGCTCTGGCCGGTGTCTGTTTCAGACGAACCCTCGTGGGGTTGAA  
GCTCATCCATCACGTAGCGCAGCGAACGACCAGCACCA GTTTCAGACGAACCCTCGT  
GGGGTTGAAGC CCTCGGT CAGAATAGGCTGCGTTCGCTGCTCTGGT GTTTCAGACGAA  
CCCTCGTGGGGTTGAAGC GGTACCTTAGCGGAACTGATTCAGTCGCTGTTGGTGGGT  
TTCGCGGA

**TATAm\_clone7**

GAAAATCACGGTTTCTTGCTATTGCCAGGATCCTCGGTTTCCGTCGACCCCCGGGGG  
GAAGCACCTTATTGATGGTCGACGGAAGGTAGGGCAGTGTACCCGCCGTTGGCAGCCT  
TATGGCCCGTATATCGGGCATG GTTTCAGACGAACCCTCGTGGGGTTGAAGC AGCGAA  
CAGACCAGCTCGCAGGTTCCACGACCACGG GTTTCAGACGAACCCTCGTGGGGTTGA  
AGCCTTTTTGCGTATTGGACGCCACATGGTAGCCGCC GTTTCAGACGAACCCTCGT  
GGGGTTGAAGC CACGACCACGGCGCAGAATCATCAGGATCATACGC GTTTCAGACGA  
ACCCTCGTGGGGTTGAAGC GGTACCTTAGCGGAACTGATTCAGTCGCTGTTTGTGGT  
TTCGCGGA

**<Leader-Repeat Junction mutants>**

**(3) JcM clones (30-bp normal duplication size)**

**JcM\_clone1**

GAAAATCACGGTTTCTTGCTATTGCCAGGATCCTCGGTTTCCGTCGACCCCCGGGGG  
GAAGCACCTTATTGATGGTCGACGGAAGGTCTTACTGTGACCCGCCGTTAGCAGCCT  
ATGGCCCGTATATCGGGCCGT TGGTCAGACGAACCCTCGTGGGGTTGAAGC GACCCGC  
GCCAACGGGTATGAGTTTGC GGCGTTCAA TGGTCAGACGAACCCTCGTGGGGTTGAA  
GCGGTACCTTAGCGGAACTGATTCAGTCGCTGTTTGGCTGTTTCGCGG

**JcM\_clone2**

GAAAATCACGGTTTCTTGCTATTGCCAGGATCCTCGGTTTCCGTCGACCCCCGGGGG  
GAAGCACCTTATTGATGGTCGACGGAAGGTCTTACTGTGACCCGCCGTTAGCAGCCT  
ATGGCCCGTATATCGGGCCGT TGGTCAGACGAACCCTCGTGGGGTTGAAGC AGGTGAC  
GAATCAGTACCGCCACCATCAGCAGCAA TGGTCAGACGAACCCTCGTGGGGTTGAAG  
CGGTACCTTAGCGGAACTGATTCAGTCGCTGTTTGGTGGTTTCGCGG

**JcM\_clone3**

GAAAATCACGGTTTCTTGCTATTGCCAGGATCCTCGGTTTCCGTCGACCCCCGGGGG  
GAAGCACCTTATTGATGGTCGACGGAAGGTCTTACTGTGACCCGCCGTTAGCAGCCT  
ATGGCCCGTATATCGGGCCGT TGGTCAGACGAACCCTCGTGGGGTTGAAGC TTGATGC  
GGTTTCACTACTGTCCGATGCGCGAGCGG TGGTCAGACGAACCCTCGTGGGGTTGAA  
GCGGTACCTTAGCGGAACTGATTCAGTCGCTGTTTGGTGGTTTCGCGG

**(4) JcM clones (30-bp normal duplication size)**

**JcM\_clone1**

GAAAATCACGGTTTCTTGCTATTGCCAGGATCCTCGGTTTCCGTCGACCCCCGGGGG  
GAAGCACCTTATTGATGGTCGACGGAAGGTCTTACTGTGACCCGCCGTTAGCAGCCT  
ATGGCCCGTATATCGGGCTACCAATCAGACGAACCCTCGTGGGGTTGAAGC ACTCCGT  
TAGCAAAACGCTTTGCGAACTGAACGT CAATCAGACGAACCCTCGTGGGGTTGAAG  
CAAGCATAAAGGCAATGACCGCGTTTCTGAAGTGCG CAATCAGACGAACCCTCGTGG



GGTTGAAGCGGTACCTTAGCGGAACTGATTCAGTCGCTGTTTGGTTGGTTTCGCGGA

**JCmT\_clone2**

GAAAATCACGGTTTCTTGCTATTGCCAGGATCCTCGGTTTCCGTCGACCCCCGGGGG  
GAAGCACCTTATTGATGGTCGACGGAAGGTCTTACTGTGACCCGCCGTTAGCAGCCTT  
ATGGCCCGTATATCGGGCTACCAATCAGACGAACCCTCGTGGGGTTGAAGCTTCGGAT  
CGTGGAATGAAGATGAGTCGTTCCCTGACAATCAGACGAACCCTCGTGGGGTTGAAG  
GGTACCTTAGCGGAACTGATTCAGTCGCTGTTTGGCTGTTTCGCGG

**JCmT\_clone3**

GAAAATCACGGTTTCTTGCTATTGCCAGGATCCTCGGTTTCCGTCGACCCCCGGGGG  
GAAGCACCTTATTGATGGTCGACGGAAGGTCTTACTGTGACCCGCCGTTAGCAGCCTT  
ATGGCCCGTATATCGGGCTACCAATCAGACGAACCCTCGTGGGGTTGAAGCAAGCATA  
AAGGCAATGACCGCGTTTCTGAAGTGCGCAATCAGACGAACCCTCGTGGGGTTGAAG  
GGTACCTTAGCGGAACTGATTCAGTCGCTGTTTGGTGGTTTCGCGG

**JCmT\_clone4**

GAAAATCACGGTTTCTTGCTATTGCCAGGATCCTCGGTTTCCGTCGACCCCCGGGGG  
GAAGCACCTTATTGATGGTCGACGGAAGGTCTTACTGTGACCCGCCGTTAGCAGCCTT  
ATGGCCCGTATATCGGGCTACCAATCAGACGAACCCTCGTGGGGTTGAAGCAGGATCA  
GACCGCATACTACTCGAGACGCAGCGTCAATCAGACGAACCCTCGTGGGGTTGAAG  
GGTACCTTAGCGGAACTGATTCAGTCGCTGTTTGGCTGTTTCGCGG

**JCmT\_clone5**

GAAAATCACGGTTTCTTGCTATTGCCAGGATCCTCGGTTTCCGTCGACCCCCGGGGG  
GAAGCACCTTATTGATGGTCGACGGAAGGTCTTACTGTGACCCGCCGTTAGCAGCCTT  
ATGGCCCGTATATCGGGCTACCAATCAGACGAACCCTCGTGGGGTTGAAGCAAGCATA  
AAGGCAATGACCGCGTTTCTGAAGTGCGCAATCAGACGAACCCTCGTGGGGTTGAAG  
GGTACCTTAGCGGAACTGATTCAGTCGCTGTTTGGT

**(5) JCmG clones (30-bp normal duplication size)**

**JCmG\_clone1**

GAAAATCACGGTTTCTTGCTATTGCCAGGATCCTCGGTTTCCGTCGACCCCCGGGGG  
GAAGCACCTTATTGATGGTCGACGGAAGGTCTTACTGTGACCCGCCGTTAGCAGCCTT  
ATGGCCCGTATATCGGGCGCAACCTCAGACGAACCCTCGTGGGGTTGAAGCACTCCGT  
TAGCAAACGCTTTGCGAACTGAACGTACCTCAGACGAACCCTCGTGGGGTTGAAG  
GGTACCTTAGCGGAACTGATTCAGTCGCTGTTTGGTGGTTTCGCGG

**JCmG\_clone2**

GAAAATCACGGTTTCTTGCTATTGCCAGGATCCTCGGTTTCCGTCGACCCCCGGGGG  
GAAGCACCTTATTGATGGTCGACGGAAGGTCTTACTGTGACCCGCCGTTAGCAGCCTT  
ATGGCCCGTATATCGGGCGCAACCTCAGACGAACCCTCGTGGGGTTGAAGCCGGTATG  
TGGCTACCTTGAGTCCACCGGACCCACACCTCAGACGAACCCTCGTGGGGTTGAAG  
GGTACCTTAGCGGAACTGATTCAGTCGCTGTTTGGTGGTTTCGCGGA

**<Important repeat mutants >**

**(6) Rm16-30 clones (31-bp aberrant duplication)**

**Rm16-30\_clone1**

GAAAATCACGGTTTCTTGCTATTGCCAGGATCCTCGGTTTCCGTCGACCCCCGGGGG  
GAAGCACCTTATTGATGGTCGACGGAAGGTCTTTACTGTGACCCGCCGTTAGCAGCCTT  
ATGGCCCGTATATCGGGCATGGTTTCAGACGAACCCGATGTTTTGGTCCTAGGACGAGG  
CGAACGCAGCGAGGAACGTACCCATCGGTTTCAGACGAACCCGATGTTTTGGTCCTAG  
GTACCTTAGCGGAACTGATTCAGTCGCTGTTTGGCTGTTTCGCGG

**Rm16-30\_clone2**

GAAAATCACGGTTTCTTGCTATTGCCAGGATCCTCGGTTTCCGTCGACCCCCGGGGG  
GAAGCACCTTATTGATGGTCGACGGAAGGTCTTTACTGTGACCCGCCGTTAGCAGCCTT  
ATGGCCCGTATATCGGGCATGGTTTCAGACGAACCCGATGTTTTGGTCCTAGCGACTGA  
GGATATTGTTGATCCGATCACGGCGGGTTTCAGACGAACCCGATGTTTTGGTCCTAGGT  
ACCTTAGCGGAACTGATTCAGTCGCTGTTTGGCTGTTTCGCGG

**Rm16-30\_clone3**

GAAAATCACGGTTTCTTGCTATTGCCAGGATCCTCGGTTTCCGTCGACCCCCGGGGG  
GAAGCACCTTATTGATGGTCGACGGAAGGTCTTTACTGTGACCCGCCGTTAGCAGCCTT  
ATGGCCCGTATATCGGGCATGGTTTCAGACGAACCCGATGTTTTGGTCCTAGCTGTTGG  
TGAGGGTTCCACCCACAAACCCACCAGTTTCAGACGAACCCGATGTTTTGGTCCTA  
GGTACCTTAGCGGAACTGATTCAGTCGCTGTTTGGCTGTTTCGCGG

**Rm16-30\_clone4**

GAAAATCACGGTTTCTTGCTATTGCCAGGATCCTCGGTTTCCGTCGACCCCCGGGGG  
GAAGCACCTTATTGATGGTCGACGGAAGGTCTTTACTGTGACCCGCCGTTAGCAGCCTT  
ATGGCCCGTATATCGGGCATGGTTTCAGACGAACCCGATGTTTTGGTCCTAGTCGATCA  
CCGTGCGAAACGTCCCGCGCTCGCCTGTTTCAGACGAACCCGATGTTTTGGTCCTAG  
TCATCCATCACGTAGCGCAGCGAACGACCAGCACGTTTCAGACGAACCCGATGTTT  
GGTCCTAGGTACCTTAGCGGAACTGATTCAGTCGCTGTTTGGTGGTTTCGCGG

**Rm16-30\_clone5**

GAAAATCACGGTTTCTTGCTATTGCCAGGATCCTCGGTTTCCGTCGACCCCCGGGGG  
GAAGCACCTTATTGATGGTCGACGGAAGGTCTTTACTGTGACCCGCCGTTAGCAGCCTT  
ATGGCCCGTATATCGGGCATGGTTTCAGACGAACCCGATGTTTTGGTCCTAGCGCGATC  
TCCCGAGCGTGATCAACTGGGGGCCGACCGTTTCAGACGAACCCGATGTTTTGGTCCT  
AGGGCTATATGGCTGGCCGTACGGTTGATCCGGAGCGGGGTTTCAGACGAACCCGATGT  
TTTTGGTCCTAGGTACCTTAGCGGAACTGATTCAGTCGCTGTTTGGTGGTTTCGCGG

**Rm16-30\_clone6**

GAAAATCACGGTTTCTTGCTATTGCCAGGATCCTCGGTTTCCGTCGACCCCCGGGGG  
GAAGCACCTTATTGATGGTCGACGGAAGGTCTTTACTGTGACCCGCCGTTAGCAGCCTT  
ATGGCCCGTATATCGGGCATGGTTTCAGACGAACCCGATGTTTTGGTCCTAGGGATAGT  
TGAGCACGTTGGTAATGATGTGTCTGCCTGTTTCAGACGAACCCGATGTTTTGGTCCTA  
GGTACCTTAGCGGAACTGATTCAGTCGCTGTTTGGTGGTTTCGCGG

**Rm16-30\_clone7**

GAAAATCACGGTTTCTTGCTATTGCCAGGATCCTCGGTTTCCGTCGACCCCCGGGGG  
GAAGCACCTTATTGATGGTCGACGGAAGGTCTTTACTGTGACCCGCCGTTAGCAGCCTT  
ATGGCCCGTATATCGGGCATGGTTTCAGACGAACCCGATGTTTTGGTCCTAGGGTCTGT  
GTCTCTACTGCTACGTTTCTGAAACTGAGTTTCAGACGAACCCGATGTTTTGGTCCTAG  
GTACCTTAGCGGAACTGATTCAGTCGCTGTTTGGTGGTTTCGCGGAGA

**Rm16-30\_clone8**

GAAAATCACGGTTTCTTGCTATTGCCAGGATCCTCGGTTTCCGTCGACCCCCGGGGG  
GAAGCACCTTATTGATGGTCGACGGAAGGTCTTACTGTGACCCGCCGTTAGCAGCCTT  
ATGGCCCGTATATCGGGCATG[GTTTCAGACGAACCCGATGTTTTGGTCCTA]CAGCTGG  
GTATTGTAATGAGTCAGAATGTTCTGCTG[GTTTCAGACGAACCCGATGTTTTGGTCCTA]  
[G]GTACCTTAGCGGAACTGATTCAGTCGCTGTTTGAGTGTTTCGCGG

**Rm16-30\_clone9**

GAAAATCACGGTTTCTTGCTATTGCCAGGATCCTCGGTTTCCGTCGACCCCCGGGGG  
GAAGCACCTTATTGATGGTCGACGGAAGGTCTTACTGTGACCCGCCGTTAGCAGCCTT  
ATGGCCCGTATATCGGGCATG[GTTTCAGACGAACCCGATGTTTTGGTCCTA]CCACCCA  
CAAACCCACCCACCCACAGGACACCGGA[GTTTCAGACGAACCCGATGTTTTGGTCCTA]  
[G]GTACCTTAGCGGAACTGATTCAGTCGCTGTTTGAGCTGTTTCGCGGAG

**(7) Rm18-22 clones (31-bp aberrant size with one exception)**

**Rm18-22\_clone1**

GAAAATCACGGTTTCTTGCTATTGCCAGGATCCTCGGTTTCCGTCGACCCCCGGGGG  
GAAGCACCTTATTGATGGTCGACGGAAGGTCTTACTGTGACCCGCCGTTAGCAGCCTT  
ATGGCCCGTATATCGGGCATG[GTTTCAGACGAACCTCTCTCCGTTGAAGCG]TTGATGCG  
GTTTCACTACTGTCCGATGCGCGAGCGG[GTTTCAGACGAACCTCTCTCCGTTGAAGCG]  
[G]GTACCTTAGCGGAACTGATTCAGTCGCTGTTTGGGTGTTTTTCGCGG

**Rm18-22\_clone2**

GAAAATCACGGTTTCTTGCTATTGCCAGGATCCTCGGTTTCCGTCGACCCCCGGGGG  
GAAGCACCTTATTGATGGTCGACGGAAGGTCTTACTGTGACCCGCCGTTAGCAGCCTT  
ATGGCCCGTATATCGGGCATG[GTTTCAGACGAACCTCTCTCCGTTGAAGCG]AGTGGTG  
AGTTGACTGCGCTCGAGGAAACACAGTCG[GTTTCAGACGAACCTCTCTCCGTTGAAG]  
[G]GTACCTTAGCGGAACTGATTCAGTCGCTGTTTGAGTGGGTTTCGCGGA

**Rm18-22\_clone3**

GAAAATCACGGTTTCTTGCTATTGCCAGGATCCTCGGTTTCCGTCGACCCCCGGGGG  
GAAGCACCTTATTGATGGTCGACGGAAGGTCTTACTGTGACCCGCCGTTAGCAGCCTT  
ATGGCCCGTATATCGGGCATG[GTTTCAGACGAACCTCTCTCCGTTGAAGCG]TGAAACT  
GAATCGTCGTCTGTTCCGGAGTGGTCTGA[GTTTCAGACGAACCTCTCTCCGTTGAAGC]  
[G]GTACCTTAGCGGAACTGATTCAGTCGCTGTTTGAGTTTGTTCGCGG

**Rm18-22\_clone4**

GAAAATCACGGTTTCTTGCTATTGCCAGGATCCTCGGTTTCCGTCGACCCCCGGGGG  
GAAGCACCTTATTGATGGTCGACGGAAGGTCTTACTGTGACCCGCCGTTAGCAGCCTT  
ATGGCCCGTATATCGGGCATG[GTTTCAGACGAACCTCTCTCCGTTGAAGCG]GGAAAAC  
GTTAGATACTGACGTTGCGTCTGAAGCTA[GTTTCAGACGAACCTCTCTCCGTTGAAGC]  
[G]GTACCTTAGCGGAACTGATTCAGTCGCTGTTTGACTGGTTTCGCGGA

**Rm18-22\_clone5 (exceptional)**

GAAAATCACGGTTTCTTGCTATTGCCAGGATCCTCGGTTTCCGTCGACCCCCGGGGG  
GAAGCACCTTATTGATGGTCGACGGAAGGTCTTACTGTGACCCGCCGTTAGCAGCCTT  
ATGGCCCGTATATCGGGCATG[GTTTCAGACGAACCTCTCTCCGTTGAAGC]GCTGAAGAT  
ATGAGTTGGTCGGAGCTGCTCGAAGA[GTTTCAGACGAACCTCTCTCCGTTGAAGC]GGT  
ACCTTAGCGGAACTGATTCAGTCGCTGTTTGAGTGTTTCGCGG

**Rm18-22\_clone6**

GAAAATCACGGTTTCTTGCTATTGCCAGGATCCTCGGTTTCCGTCGACCCCCGGGGG  
GAAGCACCTTATTGATGGTCGACGGAAGGTCTTTACTGTGACCCGCCGTTAGCAGCCTT  
ATGGCCCGTATATCGGGCATG[GTTTCAGACGAACCTCTCTCCGTTGAAGCG]CGGCAGC  
GGGTGGATAAACCCGGATGCCGGTGAGGA[GTTTCAGACGAACCTCTCTCCGTTGAAG  
CG]GGTCTGCTGCTCGGTCCTGTGTGATGTCCGTCGTGC[GTTTCAGACGAACCTCTCTC  
CGTTGAAGCG]GTACCTTAGCGGAAGTATTAGTCGCTGTTGAGTGGGTTTCGCGGA

**Rm18-22\_clone7**

GAAAATCACGGTTTCTTGCTATTGCCAGGATCCTCGGTTTCCGTCGACCCCCGGGGG  
GAAGCACCTTATTGATGGTCGACGGAAGGTCTTTACTGTGACCCGCCGTTAGCAGCCTT  
ATGGCCCGTATATTGGGCATG[GTTTCAGACGAACCTCTCTCCGTTGAAGCG]CGTTGAT  
AACAGTTGGATGGCTGCGTATCAGGAT[GTTTCAGACGAACCTCTCTCCGTTGAAGCG]G  
TACCTTAGCGGAAGTATTAGTCGCTGTTGAGTGGG

**Rm18-22\_clone8**

GAAAATCACGGTTTCTTGCTATTGCCAGGATCCTCGGTTTCCGTCGACCCCCGGGGG  
GAAGCACCTTATTGATGGTCGACGGAAGGTCTTTACTGTGACCCGCCGTTAGCAGCCTT  
ATGGCCCGTATATCGGGCATG[GTTTCAGACGAACCTCTCTCCGTTGAAGCG]TGACTCAT  
TACAATACCAGCTGGAACAGGTGAAA[GTTTCAGACGAACCTCTCTCCGTTGAAGCG]G  
TACCTTAGCGGAAGTATTAGTCGCTGTTGACTTGTTCGCGGA

**(8) Rm23-30 clones (30-bp normal duplication size)**

**Rm23-30\_clone1**

GAAAATCACGGTTTCTTGCTATTGCCAGGATCCTCGGTTTCCGTCGACCCCCGGGGG  
GAAGCACCTTATTGATGGTCGACGGAAGGTCTTTACTGTGACCCGCCGTTAGCAGCCTT  
ATGGCCCGTATATCGGGCATG[GTTTCAGACGAACCTCTGTGGGACCAGGAT]GAAGAGG  
GCACGCTGCCTGATCACGGTGAGTCGCTG[GTTTCAGACGAACCTCTGTGGGACCAGG  
AT]GGTACCTTAGCGGAAGTATTAGTCGCTGTTGAGTTTGTTCGCGG

**Rm23-30\_clone2**

GAAAATCACGGTTTCTTGCTATTGCCAGGATCCTCGGTTTCCGTCGACCCCCGGGGG  
GAAGCACCTTATTGATGGTCGACGGAAGGTCTTTACTGTGACCCGCCGTTAGCAGCCTT  
ATGGCCCGTATATCGGGCATG[GTTTCAGACGAACCTCTGTGGGACCAGGAT]GAAGAGG  
GCACGCTGCCTGATCACGGTGAGTCGCT[GTTTCAGACGAACCTCTGTGGGACCAGGAT]  
GGTACCTTAGCGGAAGTATTAGTCGCTGTTGAGTTGGTTTCGCGG

**Rm23-30\_clone3**

GAAAATCACGGTTTCTTGCTATTGCCAGGATCCTCGGTTTCCGTCGACCCCCGGGGG  
GAAGCACCTTATTGATGGTCGACGGAAGGTCTTTACTGTGACCCGCCGTTAGCAGCCTT  
ATGGCCCGTATATCGGGCATG[GTTTCAGACGAACCTCTGTGGGACCAGGAT]GTGCTGAT  
CGATGAGGGCAGCACGCACTTCGATGCT[GTTTCAGACGAACCTCTGTGGGACCAGGAT]  
GGTACCTTAGCGGAAGTATTAGTCGCTGTTGAGTGGTTTCGCGGA

**Rm23-30\_clone4**

GAAAATCACGGTTTCTTGCTATTGCCAGGATCCTCGGTTTCCGTCGACCCCCGGGGG  
GAAGCACCTTATTGATGGTCGACGGAAGGTCTTTACTGTGACCCGCCGTTAGCAGCCTT  
ATGGCCCGTATATCGGGCATG[GTTTCAGACGAACCTCTGTGGGACCAGGAT]AGGATCA  
GACCGCATACATACTCGAGACGCAGCG[GTTTCAGACGAACCTCTGTGGGACCAGGAT]  
GGTACCTTAGCGGAAGTATTAGTCGCTGTTGACTGG

**Rm23-30\_clone5**

GAAAATCACGGTTTCTTGCTATTGCCAGGATCCTCGGTTTCCGTCGACCCCCGGGGG  
GAAGCACCTTATTGATGGTCGACGGAAGGTCTTTACTGTGACCCGCCGTTAGCAGCCTT  
ATGGCCCGTATATCGGGCATG[GTTTCAGACGAACCCTCGTGGGACCAGGAT]CAGTCAG  
ACGCCGGTTTGTGAGATCATGTGCATCA[GTTTCAGACGAACCCTCGTGGGACCAGGA  
T]TGCTGAATAGCAGCGAAATACTCATTATCGATGA[GTTTCAGACGAACCCTCGTGGG  
ACCAGGAT]GGTACCTTAGCGGAACTGATTCAGTCGCTGTTTGTAGTGG

**Rm23-30\_clone6**

GAAAATCACGGTTTCTTGCTATTGCCAGGATCCTCGGTTTCCGTCGACCCCCGGGGG  
GAAGCACCTTATTGATGGTCGACGGAAGGTCTTTACTGTGACCCGCCGTTAGCAGCCTT  
ATGGCCCGTATATCGGGCATG[GTTTCAGACGAACCCTCGTGGGACCAGGAT]GTGGGAC  
GCTTGATCCTGATGCTGATGAACAGCGTT[GTTTCAGACGAACCCTCGTGGGACCAGGA  
T]GGTACCTTAGCGGAACTGATTCATTCGCTGTTTACTGTTTTTCGCGG

**Rm23-30\_clone7**

GAAAATCACGGTTTCTTGCTATTGCCAGGATCCTCGGTTTCCGTCGACCCCCGGGGG  
GAAGCACCTTATTGATGGTCGACGGAAGGTCTTTACTGTGACCCGCCGTTAGCAGCCTT  
ATGGCCCGTATATCGGGCATG[GTTTCAGACGAACCCTCGTGGGACCAGGAT]GGTAAAT  
AGAGGTATCCAAAATGCAATTTTTTAAATA[GTTTCAGACGAACCCTCGTGGGACCAG  
GAT]GGTACCTTAGCGGAACTGATTCAGTCGCTGTTTACTTGTTCGCGGA

**Rm23-30\_clone8**

GAAAATCACGGTTTCTTGCTATTGCCAGGATCCTCGGTTTCCGTCGACCCCCGGGGG  
GAAGCACCTTATTGATGGTCGACGGAAGGTCTTTACTGTGACCCGCCGTTAGCAGCCTT  
ATGGCCCGTATATCGGGCATG[GTTTCAGACGAACCCTCGTGGGACCAGGAT]CGCTCGC  
ACTGGCCGGTGTGCTCTGGCCGGTGCTG[GTTTCAGACGAACCCTCGTGGGACCAGG  
AT]GGTACCTTAGCGGAACTGATTCAGTCGCTGTTTACTTGTTCGCGGA

**Rm23-30\_clone9**

GAAAATCACGGTTTCTTGCTATTGCCAGGATCCTCGGTTTCCGTCGACCCCCGGGGG  
GAAGCACCTTATTGATGGTCGACGGAAGGTCTTTACTGTGACCCGCCCTTAGCAGCCTT  
ATGGCCCGTATATCGGGCATG[GTTTCAGACGAACCCTCGTGGGACCAGGAT]GTCTGCT  
GCGGTGGTGATCGGCGTGGATAACCGTCGC[GTTTCAGACGAACCCTCGTGGGACCAGGA  
T]GGTACCTTAGCGGAACTGATTCAGTCGCTGTTTGTAGTGTTTTTTCGCGG

**Rm23-30\_clone10**

GAAAATCACGGTTTCTTGCTATTGCCAGGATCCTCGGTTTCCGTCGACCCCCGGGGG  
GAAGCACCTTATTGATGGTCGACGGAAGGTCTTTACTGTGACCCGCCGTTAGCAGCCTT  
ATGGCCCGTATATCGGGCATG[GTTTCAGACGAACCCTCGTGGGACCAGGAT]CGCGATCT  
CCCGAGCGTGATCAACTGGGGGCCGA[GTTTCAGACGAACCCTCGTGGGACCAGGAT]G  
GTACCTTAGCGGAACTGATTCAGTCGCTGTTTGTAGCTGTTTTCGCGG

**Rm23-30\_clone11**

GAAAATCACGGTTTCTTGCTATTGCCAGGATCCTCGGTTTCCGTCGACCCCCGGGGG  
GAAGCACCTTATTGATGGTCGACGGAAGGTCTTTACTGTGACCCGCCGTTAGCAGCCTT  
ATGGCCCGTATATCGGGCATG[GTTTCAGACGAACCCTCGTGGGACCAGGAT]GTGGGAC  
GCTTGATCCTGATGCTGATGAACAGCGT[GTTTCAGACGAACCCTCGTGGGACCAGGAT]  
GGTACCTTAGCGGAACTGATTCAGTCGCTGTTTGTAGTTGGTTTTTCGCGGA

**Rm23-30\_clone12**

GAAAATCACGGTTTCTTGCTATTGCCAGGATCCTCGGTTTCCGTCGACCCCCGGGGG  
GAAGCACCTTATTGATGGTCGACGGAAGGTCTTACTGTGACCCGCCGTTAGCAGCCTT  
ATGGCCCGTATATCGGGCATGGTTTCAGACGAACCCCGTGGGACCAGGATCGACTGA  
GGATATTGTTGATCCGATCACGGCGGGTTTCAGACGAACCCCGTGGGACCAGGATGG  
TACCTTAGCGGAACTGATTCAGTCGCTGTTGACTTGTTTCGCGG

**(9) Rm16-20 clones (31-bp aberrant size with one exception)**

**Rm16-20\_clone1**

GAAAATCACGGTTTCTTGCTATTGCCAGGATCCTCGGTTTCCGTCGACCCCCGGGGG  
GAAGCACCTTATTGATGGTCGACGGAAGGTCTTACTGTGACCCGCCGTTAGCAGCCTT  
ATGGCCCGTATATCGGGCATGGTTTCAGACGAACCCGATGTGGGTTGAAGCGCCCACT  
GGGAACCGCAGGCAGTACACACGACATTGAGTTTCAGACGAACCCGATGTGGGTTGA  
AGCGGTACCTTAGCGGAACTGATTCAGTCGCTGTTGACTGTTTCGCGGA

**Rm16-20\_clone2**

GAAAATCACGGTTTCTTGCTATTGCCAGGATCCTCGGTTTCCGTCGACCCCCGGGGG  
GAAGCACCTTATTGATGGTCGACGGAAGGTCTTACTGTGACCCGCCGTTAGCAGCCTT  
ATGGCCCGTATATCGGGCATGGTTTCAGACGAACCCGATGTGGGTTGAAGCGACGAAT  
AAGAAGATTACTGATGGCAGTGGTAATGGTTTCAGACGAACCCGATGTGGGTTGAAGC  
GGTACCTTAGCGGAACTGATTCAGTCGCTGTTGAGCTGTTTCGCGGG

**Rm16-20\_clone3**

GAAAATCACGGTTTCTTGCTATTGCCAGGATCCTCGGTTTCCGTCGACCCCCGGGGG  
GAAGCACCTTATTGATGGTCGACGGAAGGTCTTACTGTGACCCGCCGTTAGCAGCCTT  
ATGGCCCGTATATCGGGCATGGTTTCAGACGAACCCGATGTGGGTTGAAGCGGTGGGA  
CGTTGATCCTGATGCTGATGAACAGCGTTTCAGACGAACCCGATGTGGGTTGAAGCG  
GTACCTTAGCGGAACTGATTCAGTCGCTGTTGAGCTGTTTCGCGGA

**Rm16-20\_clone4**

GAAAATCACGGTTTCTTGCTATTGCCAGGATCCTCGGTTTCCGTCGACCCCCGGGGG  
GAAGCACCTTATTGATGGTCGACGGAAGGTCTTACTGTGACCCGCCGTTAGCAGCCTT  
ATGGCCCGTATATCGGGCATGGTTTCAGACGAACCCGATGTGGGTTGAAGCGTTTAAG  
AGCGAGCCTGAGGTTGCTGAGTTCTTCGGATGTTTCAGACGAACCCGATGTGGGTTGA  
AGCGGTACCTTAGCGGAACTGATTCAGTCGCTGTTGAGTGTTCGCGGA

**Rm16-20\_clone5**

GAAAATCACGGTTTCTTGCTATTGCCAGGATCCTCGGTTTCCGTCGACCCCCGGGGG  
GAAGCACCTTATTGATGGTCGACGGAAGGTCTTACTGTGACCCGCCGTTAGCAGCCTT  
ATGGCCCGTATATCGGGCATGGTTTCAGACGAACCCGATGTGGGTTGAAGCGACTCCG  
TTAGCAAAACGCTTTGCGAACTGAACGTGTTTCAGACGAACCCGATGTGGGTTGAA  
GCGGTACCTTAGCGGAACTGATTCAGTCGCTGTTGACTGTTTCGCGG

**Rm16-20\_clone6**

GAAAATCACGGTTTCTTGCTATTGCCAGGATCCTCGGTTTCCGTCGACCCCCGGGGG  
GAAGCACCTTATTGATGGTCGACGGAAGGTCTTACTGTGACCCGCCGTTAGCAGCCTT  
ATGGCCCGTATATCGGGCATGGTTTCAGACGAACCCGATGTGGGTTGAAGCGGTGGGA  
CGTTGATCCTGATGCTGATGAACAGCGTTTCAGACGAACCCGATGTGGGTTGAAGCG  
GTACCTTAGCGGAACTGATTCAGTCGCTGTTGAGCTGTTTCGCGG

**Rm16-20\_clone7**

GAAAATCACGGTTTCTTGCTATTGCCAGGATCCTCGGTTTCCGTCGACCCCCGGGGG  
GAAGCACCTTATTGATGGTCGACGGAAGGTCTTACTGTGACCCGCCGTTAGCAGCCTT  
ATGGCCCGTATATCGGGCATG GTTTCAGACGAACCCGATGTGGGTTGAAGCG ACTCCG  
TTAGCAAAACGCTTTGCGAACTGAACGT GTTTCAGACGAACCCGATGTGGGTTGAA  
GCGAGGATGAGCTGGGCGAGCTGCAAGATGATGAGTTCGC GTTTCAGACGAACCCGA  
TGTGGGTTGAAGCGGTACCTTAGCGGAACTGATTCAGTCGCTGTTTGAGCTGTTTCGC  
G

**Rm16-20\_clone8**

GAAAATCACGGTTTCTTGCTATTGCCAGGATCCTCGGTTTCCGTCGACCCCCGGGGG  
GAAGCACCTTATTGATGGTCGACGGAAGGTCTTACTGTGACCCGCCGTTAGCAGCCTT  
ATGGCCCGTATATCGGGCATG GTTTCAGACGAACCCGATGTGGGTTGAAGCG GCTGAT  
CGGTGGTCCGTGGTCGTCTGGTGACGCTA GTTTCAGACGAACCCGATGTGGGTTGAAG  
CGGTACCTTAGCGGAACTGATTCAGTCGCTGTTTGAGCTGTTTCGCGGA

**Rm16-20\_clone9**

GAAAATCACGGTTTCTTGCTATTGCCAGGATCCTCGGTTTCCGTCGACCCCCGGGGG  
GAAGCACCTTATTGATGGTCGACGGAAGGTCTTACTGTGACCCGCCGTTAGCAGCCTT  
ATGGCCCGTATATCGGGCATG GTTTCAGACGAACCCGATGTGGGTTGAAGCG TGCTAC  
CCGCTCCGGATCAACCGTACGGCCAGCC GTTTCAGACGAACCCGATGTGGGTTGAAGC  
CGGTACCTTAGCGGAACTGATTCAGTCGCTGTTTGAGCTGTTTCGCGG

**Rm16-20\_clone10 (exceptional)**

GAAAATCACGGTTTCTTGCTATTGCCAGGATCCTCGGTTTCCGTCGACCCCCGGGGG  
GAAGCACCTTATTGATGGTCGACGGAAGGTCTTACTGTGACCCGCCGTTAGCAGCCTT  
ATGGCCCGTATATCGGGCATG GTTTCAGACGAACCCGATGTGGGTTGAAGC AGGATCA  
GACCGCATACTACTCGAGACGCAGCGTG GTTTCAGACGAACCCGATGTGGGTTGAA  
CGGGTACCTTAGCGGAACTGATTCAGTCGCTGTTTGAGCTGTTTCGCGGA

**(10)Rm-GT clones (30-bp normal duplication size)**

**Rm-GT\_clone1**

GAAAATCACGGTTTCTTGCTATTGCCAGGATCCTCGGTTTCCGTCGACCCCCGGGGG  
GAAGCACCTTATTGATGGTCGACGGAAGGTCTTACTGTGACCCGCCGTTAGCAGCCTT  
ATGGCCCGTATATCGGGCATG GTTTCAGACGAACCCGAGTTGGGTTGAAGC CGACTGA  
GGATATTGTTGATCCGATCACGGCGGCG GTTTCAGACGAACCCGAGTTGGGTTGAAGC  
GGTACCTTAGCGGAACTGATTCAGTCGCTGTTTGACTGGTTTCGCGGGT

**Rm-GT\_clone2**

GAAAATCACGGTTTCTTGCTATTGCCAGGATCCTCGGTTTCCGTCGACCCCCGGGGG  
GAAGCACCTTATTGATGGTCGACGGAAGGTCTTACTGTGACCCGCCGTTAGCAGCCTT  
ATGGCCCGTATATCGGGCATG GTTTCAGACGAACCCGAGTTGGGTTGAAGC GCTATATG  
GCTGGCCGTACGGTTGATCCGGAGCGGG GTTTCAGACGAACCCGAGTTGGGTTGAAG  
CGGGTACCTTAGCGGAACTGATTCAGTCGCTGTTTGACTGGT

**Rm-GT\_clone3**

GAAAATCACGGTTTCTTGCTATTGCCAGGATCCTCGGTTTCCGTCGACCCCCGGGGG  
GAAGCACCTTATTGATGGTCGACGGAAGGTCTTACTGTGACCCGCCGTTAGCAGCCTT  
ATGGCCCGTATATCGGGCATG GTTTCAGACGAACCCGAGTTGGGTTGAAGC CGGTATG  
TGGCTCACCTTGAGTCCACCGGACCCACTG GTTTCAGACGAACCCGAGTTGGGTTGA

AGCGGTACCTTAGCGGAACTGATTCAGTCGCTGTTTACTGGTTTCGCGGGA

**Rm-GT\_clone4**

GAAAATCACGGTTTCTTGCTATTGCCAGGATCCTCGGTTTCCGTCGACCCCCGGGGG  
GAAGCACCTTATTGATGGTCGACGGAAGGTCTTACTGTGACCCGCCGTTAGCAGCCTT  
ATGGCCCGTATATCGGGCATGGTTTCAGACGAACCCGAGTTGGGTTGAAGCTTGATGC  
GGTTTCACTACTGTCCGATGCGCGAGCAGGTTTCAGACGAACCCGAGTTGGGTTGAAG  
CGGTACCTTAGCGGAACTGATTCAGTCGCTGTTTACTGGTTTCGCGGG

**Rm-GT\_clone5**

GAAAATCACGGTTTCTTGCTATTGCCAGGATCCTCGGTTTCCGTCGACCCCCGGGGG  
GAAGCACCTTATTGATGGTCGACGGAAGGTCTTACTGTGACCCGCCGTTAGCAGCCTT  
ATGGCCCGTATATCGGGCATGGTTTCAGACGAACCCGAGTTGGGTTGAAGCGTGAGAC  
ACTTGATCCTGATGCTGATGAACAGCGTGTTTCAGACGAACCCGAGTTGGGTTGAAGC  
GGTACCTTAGCGGAACTGATTCAGTCGCTGTTTACTGGTTTCGCGG

**Rm-GT\_clone6**

GAAAATCACGGTTTCTTGCTATTGCCAGGATCCTCGGTTTCCGTCGACCCCCGGGGG  
GAAGCACCTTATTGATGGTCGACGGAAGGTCTTACTGTGACCCGCCGTTAGCAGCCTT  
ATGGCCCGTATATCGGGCATGGTTTCAGACGAACCCGAGTTGGGTTGAAGCCGGCAGC  
GGGTGGATAAACCCGGATGCCGGTGAGGGTTTCAGACGAACCCGAGTTGGGTTGAAG  
CGGTACCTTAGCGGAACTGATTCAGTCGCTGTTTACTGGTTTCGCGGG

**Rm-GT\_clone7**

GAAAATCACGGTTTCTTGCTATTGCCAGGATCCTCGGTTTCCGTCGACCCCCGGGGG  
GAAGCACCTTATTGATGGTCGACGGAAGGTCTTACTGTGACCCGCCGTTAGCAGCCTT  
ATGGCCCGTATATCGGGCATGGTTTCAGACGAACCCGAGTTGGGTTGAAGCGCTGAAG  
ATATGAGTTGGTCGGAGCTGCTCGAAGAGTTTCAGACGAACCCGAGTTGGGTTGAAG  
CGGTACCTTAGCGGAACTGATTCAGTCGCTGTTTACTGGTTTCGCGG

**Rm-GT\_clone8**

GAAAATCACGGTTTCTTGCTATTGCCAGGATCCTCGGTTTCCGTCGACCCCCGGGGG  
GAAGCACCTTATTGATGGTCGACGGAAGGTCTTACTGTGACCCGCCGTTAGCAGCCTT  
ATGGCCCGTATATCGGGCATGGTTTCAGACGAACCCGAGTTGGGTTGAAGCAGGATCA  
GACCCGATACCTACTCGAGACGCAGCGTGTTTCAGACGAACCCGAGTTGGGTTGAAG  
CGGTACCTTAGCGGAACTGATTCAGTCGCTGTTTACTGGTTTCGCGG

**Rm-GT\_clone9**

GAAAATCACGGTTTCTTGCTATTGCCAGGATCCTCGGTTTCCGTCGACCCCCGGGGG  
GAAGCACCTTATTGATGGTCGACGGAAGGTCTTACTGTGACCCGCCGTTAGCAGCCTT  
ATGGCCCGTATATCGGGCATGGTTTCAGACGAACCCGAGTTGGGTTGAAGCCTGTTGG  
TGAGGGTTCCACCCACAAACCCACCAGTTTCAGACGAACCCGAGTTGGGTTGAAG  
CGGTACCTTAGCGGAACTGATTCAGTCGCTGTTTACTGGTTTCGCGGA

**Rm-GT\_clone10**

GAAAATCACGGTTTCTTGCTATTGCCAGGATCCTCGGTTTCCGTCGACCCCCGGGGG  
GAAGCACCTTATTGATGGTCGACGGAAGGTCTTACTGTGACCCGCCGTTAGCAGCCTT  
ATGGCCCGTATATCGGGCATGGTTTCAGACGAACCCGAGTTGGGTTGAAGCGTGCTGA  
TCGATGAGGGCAGCACGCACTTCGATGCTCGTTTCAGACGAACCCGAGTTGGGTTGAA  
GGGTACCTTAGCGGAACTGATTCAGTCGCTGTTTACTGGTTTCGCGGA

**Rm-GT\_clone11**



GAAAATCACGGTTTCTTGCTATTGCCAGGATCCTCGGTTTCCGTCGACCCCCGGGGG  
GAAGCACCTTATTGATGGTCGACGGAAGGTCTTTACTGTGACCCGCCGTTAGCAGCCTT  
ATGGCCCGTATATCGGGCATG[GTTTCAGACGAACCCGAGTTGGGTTGAAGC]GCTATACC  
CGCCCCCGTCGTGGTCTGCGAAAGAAG[GTTTCAGACGAACCCGAGTTGGGTTGAAG  
C]GGTACCTTAGCGGAACTGATTCAGTCGCTGTTTGAGCTGTTTCGCGGA

**(11)Dup6 clones (31-bp aberrant duplication)**

**Dup6 \_clone1**

GAAAATCACGGTTTCTTGCTATTGCCAGGATCCTCGGTTTCCGTCGACCCCCGGGGG  
GAAGCACCTTATTGATGGTCGACGGAAGGTCTTTACTGTGACCCGCCGTTAGCAGCCTT  
ATGGCCCGTATATCGGGCATG[GTTTCAAGACGAACCCTCGTGGGGTTGAAGC]CGTCGC  
GCAAAGCGGACAGGTATCAGGCTCAGTG[GTTTCAAGACGAACCCTCGTGGGGTTGAA  
G]GGTACCTTAGCGGAACTGATTCAGTCGCTGTTTGACTGGTTTCGCGG

**Dup6 \_clone2**

GAAAATCACGGTTTCTTGCTATTGCCAGGATCCTCGGTTTCCGTCGACCCCCGGGGG  
GAAGCACCTTATTGATGGTCGACGGAAGGTCTTTACTGTGACCCGCCGTTAGCAGCCTT  
ATGGCCCGTATATCGGGCATG[GTTTCAAGACGAACCCTCGTGGGGTTGAAGC]TGA AAC  
TGAATCGTCGTCTGTTCGGGAGTGGTCTG[GTTTCAAGACGAACCCTCGTGGGGTTGAA  
G]GGTACCTTAGCGGAACTGATTCAGTCGCTGTTTGAGCTGTTTCGCGG

**Dup6 \_clone3**

GAAAATCACGGTTTCTTGCTATTGCCAGGATCCTCGGTTTCCGTCGACCCCCGGGGG  
GAAGCACCTTATTGATGGTCGACGGAAGGTCTTTACTGTGACCCGCCGTTAGCAGCCTT  
ATGGCCCGTATATCGGGCATG[GTTTCAAGACGAACCCTCGTGGGGTTGAAGC]ACGCCG  
ATTAGTCCGAGCATCGAAGTGCCTGCTG[GTTTCAAGACGAACCCTCGTGGGGTTGAAG  
C]GGTACCTTAGCGGAACTGATTCAGTCGCTGTTTGACTGGTTTCGCGG

**Dup6 \_clone4**

GAAAATCACGGTTTCTTGCTATTGCCAGGATCCTCGGTTTCCGTCGACCCCCGGGGG  
GAAGCACCTTATTGATGGTCGACGGAAGGTCTTTACTGTGACCCGCCGTTAGCAGCCTT  
ATGGCCCGTATATCGGGCATG[GTTTCAAGACGAACCCTCGTGGGGTTGAAGC]TCGAGC  
AGGACTGTCAGTCGCAGGCAACCAAGCAAC[GTTTCAAGACGAACCCTCGTGGGGTTG  
AAGC]GGTACCTTAGCGGAACTGATTCAGTCGCTGTTTGAGCTGTTTCGCGG

**Dup6 \_clone5**

GAAAATCACGGTTTCTTGCTATTGCCAGGATCCTCGGTTTCCGTCGACCCCCGGGGG  
GAAGCACCTTATTGATGGTCGACGGAAGGTCTTTACTGTGACCCGCCGTTAGCAGCCTT  
ATGGCCCGTATATCGGGCATG[GTTTCAAGACGAACCCTCGTGGGGTTGAAGC]GCTATAT  
GGCTGGCCGTACGGTTGATCCGGAGCG[GTTTCAAGACGAACCCTCGTGGGGTTGAAG  
C]GGTACCTTAGCGGAACTGATTCAGTCGCTGTTTGAGTTGTTTCGCGG

**Dup6 \_clone6**

GAAAATCACGGTTTCTTGCTATTGCCAGGATCCTCGGTTTCCGTCGACCCCCGGGGG  
GAAGCACCTTATTGATGGTCGACGGAAGGTCTTTACTGTGACCCGCCGTTAGCAGCCTT  
ATGGCCCGTATATCGGGCATG[GTTTCAAGACGAACCCTCGTGGGGTTGAAGC]TCTTGT  
GCAGCGACAGGGCAACGCCGCGATCAG[GTTTCAAGACGAACCCTCGTGGGGTTGA  
AGC]GGTACCTTAGCGGAACTGATTCAGTCGCTGTTTGACTGTTTCGCGG

**Dup6 \_clone7**

GAAAATCACGGTTTCTTGCTATTGCCAGGATCCTCGGTTTCCGTCGACCCCCGGGGG  
GAAGCACCTTATTGATGGTCGACGGAAGGTCTTTACTGTGACCCGCCGTTAGCAGCCTT  
ATGGCCCGTATATCGGGCATG GTTTCAAGACGAACCCTCGTGGGGTTGAAGC AGGTGA  
CGAATCAGTACCGCCACCATCAGCAGCAACA GTTTCAAGACGAACCCTCGTGGGGTT  
GAAGCGGTACCTTAGCGGAACTGATTCAGTCGCTGTTTGAGTGGGTTTCGCGG

**Dup6\_clone8**

GAAAATCACGGTTTCTTGCTATTGCCAGGATCCTCGGTTTCCGTCGACCCCCGGGGG  
GAAGCACCTTATTGATGGTCGACGGAAGGTCTTTACTGTGACCCGCCGTTAGCAGCCTT  
ATGGCCCGTATATCGGGCATG GTTTCAAGACGAACCCTCGTGGGGTTGAAGC ACTCCG  
TTAGCAAACGCTTTGCGAAACTGAACG GTTTCAAGACGAACCCTCGTGGGGTTGAA  
GCGGTACCTTAGCGGAACTGATTCAGTCGCTGTTTGAGCTGTTTCGCG

**Dup6\_clone9**

GAAAATCACGGTTTCTTGCTATTGCCAGGATCCTCGGTTTCCGTCGACCCCCGGGGG  
GAAGCACCTTATTGATGGTCGACGGAAGGTCTTTACTGTGACCCGCCGTTAGCAGCCTT  
ATGGCCCGTATATCGGGCATG GTTTCAAGACGAACCCTCGTGGGGTTGAAGC GACTTG  
TCCGGTCTGTGCTCGGTGGCATAACCCGG GTTTCAAGACGAACCCTCGTGGGGTTGAA  
GCGGTACCTTAGCGGAACTGATTCAGTCGCTGTTTGAGCTGTTTCGCGG

**Dup6\_clone10**

GAAAATCACGGTTTCTTGCTATTGCCAGGATCCTCGGTTTCCGTCGACCCCCGGGGG  
GAAGCACCTTATTGATGGTCGACGGAAGGTCTTTACTGTGACCCGCCGTTAGCAGCCTT  
ATGGCCCGTATATCGGGCATG GTTTCAAGACGAACCCTCGTGGGGTTGAAGC TCGATC  
ACCGTGCGAAACGTCGCCGCGCTCGCCTC GTTTCAAGACGAACCCTCGTGGGGTTGA  
AGCGGTACCTTAGCGGAACTGATTCAGTCGCTGTTTGAGCTGTTTCGCGG

**(12)Del6 clones (29-bp aberrant duplication size)**

**Del6\_clone1**

GAAAATCACGGTTTCTTGCTATTGCCAGGATCCTCGGTTTCCGTCGACCCCCGGGGG  
GAAGCACCTTATTGATGGTCGACGGAAGGTCTTTACTGTGACCCGCCGTTAGCAGCCTT  
ATGGCCCGTATATCGGGCATG GTTTCGACGAACCCTCGTGGGGTTGAAGC TTTCGCAG  
ACCACGACGGGGGCCGGGTATAGCGA GTTTCGACGAACCCTCGTGGGGTTGAAGC GG  
TACCTTAGCGGAACTGATTCAGTCGCTGTTTGAGCTGTTTCGCGG

**Del6\_clone2**

GAAAATCACGGTTTCTTGCTATTGCCAGGATCCTCGGTTTCCGTCGACCCCCGGGGG  
GAAGCACCTTATTGATGGTCGACGGAAGGTCTTTACTGTGACCCGCCGTTAGCAGCCTT  
ATGGCCCGTATATCGGGCATG GTTTCGACGAACCCTCGTGGGGTTGAAGC CGCGATCTC  
CCGAGCGTGATCAACTGGGGGCCGACC GTTTCGACGAACCCTCGTGGGGTTGAAGC G  
GTACCTTAGCGGAACTGATTCAGTCGCTGTTTGAGCTGTTTCGCGG

**Del6\_clone3**

GAAAATCACGGTTTCTTGCTATTGCCAGGATCCTCGGTTTCCGTCGACCCCCGGGGG  
GAAGCACCTTATTGATGGTCGACGGAAGGTCTTTACTGTGACCCGCCGTTAGCAGCCTT  
ATGGCCCGTATATCGGGCATG GTTTCGACGAACCCTCGTGGGGTTGAAGC ATTACAAC  
AGTCGCGCCGACGCGTGCGACCGTGCAG GTTTCGACGAACCCTCGTGGGGTTGAAGC  
GGTACCTTAGCGGAACTGATTCAGTCGCTGTTTGACTTGTTCGCGG

**Del6\_clone4**

GAAAATCACGGTTTCTTGCTATTGCCAGGATCCTCGGTTTCCGTCGACCCCCGGGGG  
GAAGCACCTTATTGATGGTCGACGGAAGGTCTTTACTGTGACCCGCCGTTAGCAGCCTT  
ATGGCCCGTATATCGGGCATGGTTTCGACGAACCCTCGTGGGGTTGAAGCAGGTGACG  
AATCAGTACCGCCACCATCAGCAGCAAGTTTCGACGAACCCTCGTGGGGTTGAAGCG  
GTACCTTAGCGGAACTGATTCAGTCGCTGTTTGAGCTGTTTCGCGG

**Del6\_clone5**

GAAAATCACGGTTTCTTGCTATTGCCAGGATCCTCGGTTTCCGTCGACCCCCGGGGG  
GAAGCACCTTATTGATGGTCGACGGAAGGTCTTTACTGTGACCCGCCGTTAGCAGCCTT  
ATGGCCCGTATATCGGGCATGGTTTCGACGAACCCTCGTGGGGTTGAAGCAATACATCG  
GTCCTGCGCTGCTGATCGTTGGCTGCGTGTTTCGACGAACCCTCGTGGGGTTGAAGCG  
GTACCTTAGCGGAACTGATTCAGTCGCTGTTTGAGCTGTTTCGCGG

**Del6\_clone6**

GAAAATCACGGTTTCTTGCTATTGCCAGGATCCTCGGTTTCCGTCGACCCCCGGGGG  
GAAGCACCTTATTGATGGTCGACGGAAGGTCTTTACTGTGACCCGCCGTTAGCAGCCTT  
ATGGCCCGTATATCGGGCATGGTTTCGACGAACCCTCGTGGGGTTGAAGCGCTGATACT  
GCGCTCGGTCTGAAGTTCGAAAAGTTTCGACGAACCCTCGTGGGGTTGAAGCGGT  
ACCTTAGCGGAACTGATTCAGTCGCTGTTTGAGCTGTTTCGCGG

**Del6\_clone7**

GAAAATCACGGTTTCTTGCTATTGCCAGGATCCTCGGTTTCCGTCGACCCCCGGGGG  
GAAGCACCTTATTGATGGTCGACGGAAGGTCTTTACTGTGACCCGCCGTTAGCAGCCTT  
ATGGCCCGTATATCGGGCATGGTTTCGACGAACCCTCGTGGGGTTGAAGCATACAGTTT  
TTTGAGAACACATTTACGCGCTCTTGTTTCGACGAACCCTCGTGGGGTTGAAGCGGT  
ACCTTAGCGGAACTGATTCAGTCGCTGTTTGACTGTTTCGCGG

**Del6\_clone8**

GAAAATCACGGTTTCTTGCTATTGCCAGGATCCTCGGTTTCCGTCGACCCCCGGGGG  
GAAGCACCTTATTGATGGTCGACGGAAGGTCTTTACTGTGACCCGCCGTTAGCAGCCTT  
ATGGCCCGTATATCGGGCATGGTTTCGACGAACCCTCGTGGGGTTGAAGCGGAAAACG  
TTAGATACTGACGTTGCGTCTGAAGCTAGTTTCGACGAACCCTCGTGGGGTTGAAGCG  
GTACCTTAGCGGAACTGATTCAGTCGCTGTTTGACTGTTTCGCGG

**Del6\_clone9**

GAAAATCACGGTTTCTTGCTATTGCCAGGATCCTCGGTTTCCGTCGACCCCCGGGGG  
GAAGCACCTTATTGATGGTCGACGGAAGGTCTTTACTGTGACCCGCCGTTAGCAGCCTT  
ATGGCCCGTATATCGGGCATGGTTTCGACGAACCCTCGTGGGGTTGAAGCGGATAGTT  
GAGCACGTTGGTAATGATGTGTCTGCCGTTTCGACGAACCCTCGTGGGGTTGAAGCGG  
TACCTTAGCGGAACTGATTCAGTCGCTGTTTGACTGTTTCGCGG

**Del6\_clone10**

GAAAATCACGGTTTCTTGCTATTGCCAGGATCCTCGGTTTCCGTCGACCCCCGGGGG  
GAAGCACCTTATTGATGGTCGACGGAAGGTCTTTACTGTGACCCGCCGTTAGCAGCCTT  
ATGGCCCGTATATCGGGCATGGTTTCGACGAACCCTCGTGGGGTTGAAGCCGGTATGTG  
GCTCACCTTGAGTCCACCGGACCCACTGTTTCGACGAACCCTCGTGGGGTTGAAGCG  
GTACCTTAGCGGAACTGATTCAGTCGCTGTTTGACTGTTTCGCGG

**Del6\_clone11**

GAAAATCACGGTTTCTTGCTATTGCCAGGATCCTCGGTTTCCGTCGACCCCCGGGGG  
GAAGCACCTTATTGATGGTCGACGGAAGGTCTTTACTGTGACCCGCCGTTAGCAGCCTT

ATGGCCCGTATATCGGGCATGGTTTCGACGAACCCTCGTGGGGTTGAAGCGCAGACCA  
CGACGGGGGCCGGGTATAGCGAACGGAGTTTCGACGAACCCTCGTGGGGTTGAAGCG  
GTACCTTAGCGGAACTGATTCAGTCGCTGTTGACTGGTTTCGCGG

**Del6 \_clone12**

GAAAATCACGGTTTCTTGCTATTGCCAGGATCCTCGGTTTCCGTCGACCCCCGGGGG  
GAAGCACCTTATTGATGGTCGACGGAAGGTCTTTACTGTGACCCGCCGTTAGCAGCCTT  
ATGGCCCGTATATCGGGCATGGTTTCGACGAACCCTCGTGGGGTTGAAGCTGGTCCGG  
CGACGTTGCTGATACTGCGCTCGGGTGTTTCGACGAACCCTCGTGGGGTTGAAGCGG  
TACCTTAGCGGAACTGATTCAGTCGCTGTTGAGCTGTTTCGCGG

**(13)Dup16 clones (31-bp aberrant duplication)**

**Dup16 \_clone1**

GAAAATCACGGTTTCTTGCTATTGCCAGGATCCTCGGTTTCCGTCGACCCCCGGGGG  
GGAGGCACCTTATTGATGGTCGACGGAAGGTCTTTACTGTGACCCGCCGTTAGCAGCC  
TTATGGCCCGTATATCGGGCATGGTTTCAGACGAACCCTTCGTGGGGTTGAAGCTTTGG  
GATTGTACGTGATCTCTTCGCCGTCGTCGTGTTTCAGACGAACCCTTCGTGGGGTTGAA  
GCGGTACCTTAGCGGAACTGATTCAGTCGCTGTTGAGCTGTTTCGCGGA

**Dup16 \_clone2**

GAAAATCACGGTTTCTTGCTATTGCCAGGATCCTCGGTTTCCGTCGACCCCCGGGGG  
GGAGGCACCTTATTGATGGTCGACGGAAGGTCTTTACTGTGACCCGCCGTTAGCAGCC  
TTATGGCCCGTATATCGGGCATGGTTTCAGACGAACCCTTCGTGGGGTTGAAGCTCGAG  
CAGGACTGTCAGTCGACGCAACCAAGCAACGTTTCAGACGAACCCTTCGTGGGGTT  
GAAGCGGTACCTTAGCGGAACTGATTCAGTCGCTGTTGACTGGTTTCGCGGGAA

**Dup16 \_clone3**

GAAAATCACGGTTTCTTGCTATTGCCAGGATCCTCGGTTTCCGTCGACCCCCGGGGG  
GGAGGCACCTTATTGATGGTCGACGGAAGGTCTTTACTGTGACCCGCCGTTAGCAGCC  
TTATGGCCCGTATATCGGGCATGGTTTCAGACGAACCCTTCGTGGGGTTGAAGCACACC  
AGCAGCAGCGCCAGCAGTCACACCAACGGGTTTCAGACGAACCCTTCGTGGGGTTGA  
AGCGGTACCTTAGCGGAACTGATTCAGTCGCTGTTGAGCTGTTTCGCGGAC

**Dup16 \_clone4**

GAAAATCACGGTTTCTTGCTATTGCCAGGATCCTCGGTTTCCGTCGACCCCCGGGGG  
GGAGGCACCTTATTGATGGTCGACGGAAGGTCTTTACTGTGACCCGCCGTTAGCAGCC  
TTATGGCCCGTATATCGGGCATGGTTTCAGACGAACCCTTCGTGGGGTTGAAGCCTTTT  
TGCATTATTGACGCCACATGGTAGCCGGTTTCAGACGAACCCTTCGTGGGGTTGAAG  
CGGTACCTTAGCGGAACTGATTCAGTCGCTGTTGACTGGTTTCGCGGGAA

**Dup16 \_clone5**

GAAAATCACGGTTTCTTGCTATTGCCAGGATCCTCGGTTTCCGTCGACCCCCGGGGG  
GGAGGCACCTTATTGATGGTCGACGGAAGGTCTTTACTGTGACCCGCCGTTAGCAGCC  
TTATGGCCCGTATATCGGGCATGGTTTCAGACGAACCCTTCGTGGGGTTGAAGCTCTGC  
TGGCTGCGTTGATCGTCGTGTTACCTCTGGTTTCAGACGAACCCTTCGTGGGGTTGAA  
GCGGTACCTTAGCGGAACTGATTCAGTCGCTGTTGAGCTGTTTCGCGGGT

**Dup16 \_clone6**

GAAAATCACGGTTTCTTGCTATTGCCAGGATCCTCGGTTTCCGTCGACCCCCGGGGG  
GGAGGCACCTTATTGATGGTCGACGGAAGGTCTTTACTGTGACCCGCCGTTAGCAGCC

TTATGGCCCGTATATCGGGCATG GTTTCAGACGAACCCTTCGTGGGGTTGAAGC AATAC  
ATCGGTCTCGCTGCTGATCGTTGGCTG GTTTCAGACGAACCCTTCGTGGGGTTGAA  
GCGGTACCTTAGCGGAACTGATTCAGTCGCTGTTTGAGTTTGTTCGCGGA

**Dup16\_clone7**

GAAAATCACGGTTTCTTGCTATTGCCAGGATCCTCGGTTTCCGTCGACCCCCGGGGG  
GGAGGCACCTTATTGATGGTCGACGGAAGGTCTTACTGTGACCCGCCGTTAGCAGCC  
TTATGGCCCGTATATCGGGCATG GTTTCAGACGAACCCTTCGTGGGGTTGAAGC ACTTG  
TATCCCTCGGTCAGAATAGGCTGCGTTCGCTG GTTTCAGACGAACCCTTCGTGGGGTT  
GAAGCGGTACCTTAGCGGAACTGATTCAGTCGCTGTTTGAGTTTGTTCGCGG

**Dup16\_clone8**

GAAAATCACGGTTTCTTGCTATTGCCAGGATCCTCGGTTTCCGTCGACCCCCGGGGG  
GGAGGCACCTTATTGATGGTCGACGGAAGGTCTTACTGTGACCCGCCGTTAGCAGCC  
TTATGGCCCGTATATCGGGCATG GTTTCAGACGAACCCTTCGTGGGGTTGAAGC GCTGA  
TCGGTGGTCCGTGGTCGCTGTTGACGCTA GTTTCAGACGAACCCTTCGTGGGGTTGA  
AGCGGTACCTTAGCGGAACTGATTCAGTCGCTGTTTGAGCTGTTTCGCGG

**Dup16\_clone9**

GAAAATCACGGTTTCTTGCTATTGCCAGGATCCTCGGTTTCCGTCGACCCCCGGGGG  
GGAGGCACCTTATTGATGGTCGACGGAAGGTCTTACTGTGACCCGCCGTTAGCAGCC  
TTATGGCCCGTATATCGGGCATG GTTTCAGACGAACCCTTCGTGGGGTTGAAGC ACTAA  
GCGAGTGACGTTGACTGATGCTGGTGCCT GTTTCAGACGAACCCTTCGTGGGGTTGAA  
GCGGTACCTTAGCGGAACTGATTCAGTCGCTGTTTGAGTGGTTTCGCGGA

**Dup16\_clone10**

GAAAATCACGGTTTCTTGCTATTGCCAGGATCCTCGGTTTCCGTCGACCCCCGGGGG  
GGAGGCACCTTATTGATGGTCGACGGAAGGTCTTACTGTGACCCGCCGTTAGCAGCC  
TTATGGCCCGTATATCGGGCATG GTTTCAGACGAACCCTTCGTGGGGTTGAAGC CGCTC  
GACTGGCCGGTGTGCTCTGGCCGGTGTG GTTTCAGACGAACCCTTCGTGGGGTTG  
AAGCGGTACCTTAGCGGAACTGATTCAGTCGCTGTTTGACTGGTTTCGCGGATTCTTGC  
CAGTGCTC

**Dup16\_clone11**

GAAAATCACGGTTTCTTGCTATTGCCAGGATCCTCGGTTTCCGTCGACCCCCGGGGG  
GGAGGCACCTTATTGATGGTCGACGGAAGGTCTTACTGTGACCCGCCGTTAGCAGCC  
TTATGGCCCGTATATCGGGCATG GTTTCAGACGAACCCTTCGTGGGGTTGAAGC GCTAT  
ATGGCTGGCCGTACGGTTGATCCGGAGCGG GTTTCAGACGAACCCTTCGTGGGGTTGA  
AGCGGTACCTTAGCGGAACTGATTCAGTCGCTGTTTGAGCTGTTTCGCGGA

**Dup16\_clone12**

GAAAATCACGGTTTCTTGCTATTGCCAGGATCCTCGGTTTCCGTCGACCCCCGGGGG  
GGAGGCACCTTATTGATGGTCGACGGAAGGTCTTACTGTGACCCGCCGTTAGCAGCC  
TTATGGCCCGTATATCGGGCATG GTTTCAGACGAACCCTTCGTGGGGTTGAAGC CGGTA  
TGTGGCTCACCTTGAGTCCACCGACCACT GTTTCAGACGAACCCTTCGTGGGGTTG  
AAGCGGTACCTTAGCGGAACTGATTCAGTCGCTGTTTGAGCTTGTTCGCGG

**(14)Del16 clones (29-bp aberrant duplication size)**

**Del16\_clone1**

GAAAATCACGGTTTCTTGCTATTGCCAGGATCCTCGGTTTCCGTCGACCCCCGGGGG

GAAGCACCTTATTGATGGTCGACGGAAGGTCTTTACTGTGACCCGCCGTTAGCAGCCTT  
ATGGCCCGTATATCGGGCATGGTTTCAGACGAACCCCGTGGGGTTGAAGCAATACATC  
GGTCCTGCGCTGCTGATCGTTGGCTGCGTTTCAGACGAACCCCGTGGGGTTGAAGCGG  
TACCTTAGCGGAACTGATTCAGTCGCTGTTGAGCTGTTTCGCGGAT

**Del16\_clone2**

GAAAATCACGGTTTCTTGCTATTGCCAGGATCCTCGGTTTCCGTCGACCCCCGGGGG  
GAAGCACCTTATTGATGGTCGACGGAAGGTCTTTACTGTGACCCGCCGTTAGCAGCCTT  
ATGGCCCGTATATCGGGCATGGTTTCAGACGAACCCCGTGGGGTTGAAGCGCTATATGG  
CTGGCCGTACGGTTGATCCGGAGCGGGTTTCAGACGAACCCCGTGGGGTTGAAGCGG  
TACCTTAGCGGAACTGATTCAGTCGCTGTTGAGCTGTTTCGCGGGA

**Del16\_clone3**

GAAAATCACGGTTTCTTGCTATTGCCAGGATCCTCGGTTTCCGTCGACCCCCGGGGG  
GAAGCACCTTATTGATGGTCGACGGAAGGTCTTTACTGTGACCCGCCGTTAGCAGCCTT  
ATGGCCCGTATATCGGGCATGGTTTCAGACGAACCCCGTGGGGTTGAAGCTCTTGTGC  
AGCGACAGGGGCAACGCCGCCGATCAGCGTTTCAGACGAACCCCGTGGGGTTGAAGC  
GGTACCTTAGCGGAACTGATTCAGTCGCTGTTGACTGGTT

**Del16\_clone4**

GAAAATCACGGTTTCTTGCTATTGCCAGGATCCTCGGTTTCCGTCGACCCCCGGGGG  
GAAGCACCTTATTGATGGTCGACGGAAGGTCTTTACTGTGACCCGCCGTTAGCAGCCTT  
ATGGCCCGTATATCGGGCATGGTTTCAGACGAACCCCGTGGGGTTGAAGCGCTGATCG  
GTGGTCCGTGGTCGTCTGGTGACGTAGTTTCAGACGAACCCCGTGGGGTTGAAGCG  
GTACCTTAGCGGAACTGATTCAGTCGCTGTTGAGCTGTTTCGCGGA

**Del16\_clone5**

GAAAATCACGGTTTCTTGCTATTGCCAGGATCCTCGGTTTCCGTCGACCCCCGGGGG  
GAAGCACCTTATTGATGGTCGACGGAAGGTCTTTACTGTGACCCGCCGTTAGCAGCCTT  
ATGGCCCGTATATCGGGCATGGTTTCAGACGAACCCCGTGGGGTTGAAGCACTCCGTT  
AGCAAACGCTTTGCGAACTGAACGTGGTTTCAGACGAACCCCGTGGGGTTGAAGC  
GGTACCTTAGCGGAACTGATTCAGTCGCTGTTGACTGGTTTCGCGGAA

**Del16\_clone6**

GAAAATCACGGTTTCTTGCTATTGCCAGGATCCTCGGTTTCCGTCGACCCCCGGGGG  
GAAGCACCTTATTGATGGTCGACGGAAGGTCTTTACTGTGACCCGCCGTTAGCAGCCTT  
ATGGCCCGTATATCGGGCATGGTTTCAGACGAACCCCGTGGGGTTGAAGCGTGCTGAT  
CGATGAGGGCAGCACGCACTTCGATGCTGTTTCAGACGAACCCCGTGGGGTTGAAGC  
GGTACCTTAGCGGAACTGATTCAGTCGCTGTTGACTGGTTTCGCGG

**Del16\_clone7**

GAAAATCACGGTTTCTTGCTATTGCCAGGATCCTCGGTTTCCGTCGACCCCCGGGGG  
GAAGCACCTTATTGATGGTCGACGGAAGGTCTTTACTGTGACCCGCCGTTAGCAGCCTT  
ATGGCCCGTATATCGGGCATGGTTTCAGACGAACCCCGTGGGGTTGAAGCGTCTGCTG  
CGGTGGTGATCGGCGTGGATAACCGTCGCGTTTCAGACGAACCCCGTGGGGTTGAAGC  
GGTACCTTAGCGGAACTGATTCAGTCGCTGTTGACTGGTTTCGCGG

**Del16\_clone8**

GAAAATCACGGTTTCTTGCTATTGCCAGGATCCTCGGTTTCCGTCGACCCCCGGGGG  
GAAGCACCTTATTGATGGTCGACGGAAGGTCTTTACTGTGACCCGCCGTTAGCAGCCTT  
ATGGCCCGTATATCGGGCATGGTTTCAGACGAACCCCGTGGGGTTGAAGCGCTGAAGA

TATGAGTTGGTCGGAGCTGCTCGAAGA GTTTCAGACGAACCCCGTGGGGTTGAAGC G  
GTACCTTAGCGGAACTGATTCAGTCGCTGTTTACTTGTTCGCGG

**Del16\_clone9**

GAAAATCACGGTTTCTTGCTATTGCCAGGATCCTCGGTTTCCGTCGACCCCCGGGGG  
GAAGCACCTTATTGATGGTCGACGGAAGGTCTTTACTGTGACCCGCCGTTAGCAGCCTT  
ATGGCCCGTATATCGGGCATG GTTTCAGACGAACCCCGTGGGGTTGAAGC ACTCCGTT  
AGCAAACGCTTTGCGAAACTGAACGT GTTTCAGACGAACCCCGTGGGGTTGAAGC G  
GTACCTTAGCGGAACTGATTCAGTCGCTGTTTACTGGTTTCGCGG

**Del16\_clone10**

GAAAATCACGGTTTCTTGCTATTGCCAGGATCCTCGGTTTCCGTCGACCCCCGGGGG  
GAAGCACCTTATTGATGGTCGACGGAAGGTCTTTACTGTGACCCGCCGTTAGCAGCCAT  
AAGGCCCGTATATCGGGCATG GTTTCAGACGAACCCCGTGGGGTTGAAGC GCTATATG  
GCTGGCCGTACGGTTGATCCGGGGCGG GTTTCAGACGAACCCCGTGGGGTTGAAGC G  
GTACCTTAGCGGAACTGATTCAGTCGCTGTTTACTGGTTTCGCGGA

**(15) Dup16-17 clones (32-bp aberrant duplication size)**

**Dup16 -17\_clone1**

GAAAATCACGGTTTCTTGCTATTGCCAGGATCCTCGGTTTCCGTCGACCCCCGGGGG  
GAAGCACCTTATTGATGGTCGACGGAAGGTCTTTACTGTGACCCGCCGTTAGCAGCCTT  
ATGGCCCGTATATCGGGCATG GTTTCAGACGAACCCCTCTCGTGGGGTTGAAGC CTGGT  
GCTCGCCAGATTCATCGAGATCCGCAGCG GTTTCAGACGAACCCCTCTCGTGGGGTTGA  
AGC GGTACCTTAGCGGAACTGATTCAGTCGCTGTTTACTGGTTTCGCGG

**Dup16 -17\_clone2**

GAAAATCACGGTTTCTTGCTATTGCCAGGATCCTCGGTTTCCGTCGACCCCCGGGGG  
GAAGCACCTTATTGATGGTCGACGGAAGGTCTTTACTGTGACCCGCCGTTAGCAGCCTT  
ATGGCCCGTATATCGGGCATG GTTTCAGACGAACCCCTCTCGTGGGGTTGAAGC GCTATA  
TGGCTGGCCGTACGGTTGATCCGGAGCGG GTTTCAGACGAACCCCTCTCGTGGGGTTGA  
AGC GGTACCTTAGCGGAACTGATTCAGTCGCTGTTTACTGGTTTCGCGG

**Dup16 -17\_clone3**

GAAAATCACGGTTTCTTGCTATTGCCAGGATCCTCGGTTTCCGTCGACCCCCGGGGG  
GAAGCACCTTATTGATGGTCGACGGAAGGTCTTTACTGTGACCCGCCGTTAGCAGCCTT  
ATGGCCCGTATATCGGGCATG GTTTCAGACGAACCCCTCTCGTGGGGTTGAAGC GGAAA  
ACGTTAGATACTGACGTTGCGACTGAAGCTA GTTTCAGACGAACCCCTCTCGTGGGGTT  
GAAGC GGTACCTTAGCGGAACTGATTCAGTCGCTGTTTACTGGTTTCGCGG

**Dup16 -17\_clone4**

GAAAATCACGGTTTCTTGCTATTGCCAGGATCCTCGGTTTCCGTCGACCCCCGGGGG  
GAAGCACCTTATTGATGGTCGACGGAAGGTCTTTACTGTGACCCGCCGTTAGCAGCCTT  
ATGGCCCGTATATCGGGCATG GTTTCAGACGAACCCCTCTCGTGGGGTTGAAGC ATTACA  
ACAGTCGCGCCGACGCTGCGACCGTGCAG GTTTCAGACGAACCCCTCTCGTGGGGTT  
GAAGC GGTACCTTAGCGGAACTGATTCAGTCGCTGTTTACTGGTTTCGCGG

**Dup16 -17\_clone5**

GAAAATCACGGTTTCTTGCTATTGCCAGGATCCTCGGTTTCCGTCGACCCCCGGGGG  
GAAGCACCTTATTGATGGTCGACGGAAGGTCTTTACTGTGACCCGCCGTTAGCAGCCTT  
ATGGCCCGTATATCGGGCATG GTTTCAGACGAACCCCTCTCGTGGGGTTGAAGC GGGAG

CTGTCGGTAACTGGTCCTAACGGTAATCCG GTTTCAGACGAACCCTCTCGTGGGGTTG  
AAGCGGTACCTTAGCGGAACTGATTCAGTCGCTGTTTGAGTGGTTTTCGCGG

**Dup16 -17\_clone6**

CGAAAATCACGGTTTCTTGCTATTGCCCAGGATCCTCGGTTTCCGTCGACCCCCGGGG  
GGAAGCACCTTATTGATGGTCGACGGAAGGTCTTTACTGTGACCCGCCGTTAGCAGCC  
TTATGGCCCGTATATCGGGCATG GTTTCAGACGAACCCTCTCGTGGGGTTGAAGCGCTA  
TATGGCTGGCCGTACGGTTGATCCGGAGCGGG GTTTCAGACGAACCCTCTCGTGGGGT  
TGAAGCGGTACCTTAGCGGAACTGATTCAGTCGCTGTTTGAGCTGTTTCGCGG

**Dup16 -17\_clone7**

GAAAATCACGGTTTCTTGCTATTGCCCAGGATCCTCGGTTTCCGTCGACCCCCGGGG  
GAAGCACCTTATTGATGGTCGACGGAAGGTCTTTACTGTGACCCGCCGTTAGCAGCCT  
ATGGCCCGTATATCGGGCATG GTTTCAGACGAACCCTCTCGTGGGGTTGAAGCCGTCG  
CGAAAGCGGACAGGTATCAGGCTCAGCGT GTTTCAGACGAACCCTCTCGTGGGGT  
GAAGCGGTACCTTAGCGGAACTGATTCAGTCGCTGTTTGACTGGG

**Dup16 -17\_clone8**

GAAAATCACGGTTTCTTGCTATTGCCCAGGATCCTCGGTTTCCGTCGACCCCCGGGG  
GAAGCACCTTATTGATGGTCGACGGAAGGTCTTTACTGTGACCCGCCGTTAGCAGCCT  
ATGGCCCGTATATCGGGCATG GTTTCAGACGAACCCTCTCGTGGGGTTGAAGCGCGCT  
CTAAAGCCTTCAGCCGCGCTCGCTCTTTATC GTTTCAGACGAACCCTCTCGTGGGGTTG  
AAGCGGTACCTTAGCGGAACTGATTCAGTCGCTGTTTGAGTTGTTTCGCGG

**Dup16 -17\_clone9**

GAAAATCACGGTTTCTTGCTATTGCCCAGGATCCTCGGTTTCCGTCGACCCCCGGGG  
GAAGCACCTTATTGATGGTCGACGGAAGGTCTTTACTGTGACCCGCCGTTAGCAGCCT  
ATGGCCCGTATATCGGGCATG GTTTCAGACGAACCCTCTCGTGGGGTTGAAGCTCATCA  
GCCACTTTCATCGACGTAGCACCCCTCTT GTTTCAGACGAACCCTCTCGTGGGGTTGAA  
GCGGTACCTTAGCGGAACTGATTCAGTCGCTGTTTGAGTGGGTTTCGCGG

**Dup16 -17\_clone10**

GAAAATCACGGTTTCTTGCTATTGCCCAGGATCCTCGGTTTCCGTCGACCCCCGGGG  
GAAGCACCTTATTGATGGTCGACGGAAGGTCTTTACTGTGACCCGCCGTTAGCAGCCT  
ATGGCCCGTATATCGGGCATG GTTTCAGACGAACCCTCTCGTGGGGTTGAAGCCGTCG  
CGAAAGCGGACAGGTATCAGGCTCAGCG GTTTCAGACGAACCCTCTCGTGGGGTTG  
AAGCGGTACCTTAGCGGAACTGATTCAGTCGCTGTTTGAGTTGGTTTCGCGG

**(16)Dup18 clones (31-bp aberrant duplication)**

**Dup18\_clone1**

GAAAATCACGGTTTCTTGCTATTGCCCAGGATCCTCGGTTTCCGTCGACCCCCGGGG  
GAAGCACCTTATTGATGGTCGACGGAAGGTCTTTACTGTGACCCGCCGTTAGCAGCCT  
ATGGCCCGTATATCGGGCATG GTTTCAGACGAACCCTCGGTGGGGTTGAAGCCTCAAG  
GTTGGCAAGAACATGCAGTTAGAAGAGATG GTTTCAGACGAACCCTCGGTGGGGTTG  
AAGCGGTACCTTAGCGGAACTGATTCAGTCGCTGTTTGGTGTTCGCGGA

**Dup18\_clone2**

GAAAATCACGGTTTCTTGCTATTGCCCAGGATCCTCGGTTTCCGTCGACCCCCGGGG  
GAAGCATCTTATTGATGGTCGACGGAAGGTCTTTACTGTGACCCGCCGTTAGCAGCCT  
ATGGCCCGTATATCGGGCATG GTTTCAGACGAACCCTCGGTGGGGTTGAAGCGGTCTG



TGCTCTACTGCTACGTTTCTGAAACTGGTTTCAGACGAACCCTCGGTGGGGTTGAAG  
CGGTACCTTAGCGGAACTGATTCAGTCGCTGTTTGCCGTGTTTCGCGG

**Dup18\_clone3**

GAAAATCACGGTTTCTTGCTATTGCCAGGATCCTCGGTTTCCGTCGACCCCCGGGGG  
GAAGCACCTTATTGATGGTCGACGGAAGGTCTTTACTGTGACCCGCCGTTAGCAGCCTT  
ATGGCCCGTATATCGGGCATGGTTTCAGACGAACCCTCGGTGGGGTTGAAGCCTTTTTG  
CGTATTGGACGCCACATGGTATCCGCGTTTCAGACGAACCCTCGGTGGGGTTGAAGC  
GGTACCTTATCGGAACTGATTCAGTCGCTGTTGACTGGTTCTCGGG

**Dup18\_clone4**

GAAAATCACGGTTTCTTGCTATTGCCAGGATCCTCGGTTTCCGTCGACCCCCGGGGG  
GAAGCACCTTATTGATGGTCGACGGAAGGTCTTTACTGTGACCCGCCGTTAGCAGCCTT  
ATGGCCCGTATATCGGGCATGGTTTCAGACGAACCCTCGGTGGGGTTGAAGCATACAG  
TTTTTTGGAGAACACATTTACGCGCTCTTGTTTCAGACGAACCCTCGGTGGGGTTGAA  
CGGTACCTTAGCGGAACTGATTCAGTCGCTGTTTGAGTT

**Dup18\_clone5**

GAAAATCACGGTTTCTTGCTATTGCCAGGATCCTCGGTTTCCGTCGACCCCCGGGGG  
GAAGCACCTTATTGATGGTCGACGGAAGGTCTTTACTGTGACCCGCCGTTAGCAGCCTT  
ATGGCCCGTATATCGGGCATGGTTTCAGACGAACCCTCGGTGGGGTTGAAGCGTGCTG  
ATCGATGAGGGCAGCACGCACTTCGATGGTTTCAGACGAACCCTCGGTGGGGTTGAA  
CGGTACCTTAGCGGAACTGATTCAGTCGCTGTTTGACTG

**Dup18\_clone6**

GAAAATCACGGTTTCTTGCTATTGCCAGGATCCTCGGTTTCCGTCGACCCCCGGGGG  
GAAGCACCTTATTGATGGTCGACGGAAGGTCTTTACTGTGACCCGCCGTTAGCAGCCTT  
ATGGCCCGTATATCGGGCATGGTTTCAGACGAACCCTCGGTGGGGTTGAAGCAGGATG  
AGCTGGGCGAGCTGCAAGATAATGAGTTCGCGTTTCAGACGAACCCTCGGTGGGGTT  
GAAGCGGTACCTTAGCGGAACTGATTCAGTCGCTGTTTGAGTGG

**Dup18\_clone7**

GAAAATCACGGTTTCTTGCTATTGCCAGGATCCTCGGTTTCCGTCGACCCCCGGGGG  
GAAGCACCTTATTGATGGTCGACGGAAGGTCTTTACTGTGACCCGCCGTTAGCAGCCTT  
ATGGCCCGTATATCGGGCATGGTTTCAGACGAACCCTCGGTGGGGTTGAAGCCGGTTT  
CCGTCTGATGACTTTCGGGAGCTGTCGGTAGTTTCAGACGAACCCTCGGTGGGGTTGA  
AGCGGTACCTTAGCGGAACTGATTCAGTCGCTGTTTGAGTG

**Dup18\_clone8**

GAAAATCACGGTTTCTTGCTATTGCCAGGATCCTCGGTTTCCGTCGACCCCCGGGGG  
GAAGCACCTTATTGATGGTCGACGGAAGGTCTTTACTGTGACCCGCCGTTAGCAGCCTT  
ATGGCCCGTATATCGGGCATGGTTTCAGACGAACCCTCGGTGGGGTTGAAGCAAGCAT  
AAAGGCAATGACCGGTTTCTGAAGTGCGTGTTTCAGACGAACCCTCGGTGGGGTTG  
AAGCGGTACCTTAGCGGAACTGATTCAGTCGCTGTTTGACTG

**Dup18\_clone9**

GAAAATCACGGTTTCTTGCTATTGCCAGGATCCTCGGTTTCCGTCGACCCCCGGGGG  
GAAGCACCTTATTGATGGTCGACGGAAGGTCTTTACTGTGACCCGCCGTTAGCAGCCTT  
ATGGCCCGTATATCGGGCATGGTTTCAGACGAACCCTCGGTGGGGTTGAAGCAGTGGT  
GAGTTGACTGCGCTCGAGGAAACACAGTCGGTTTCAGACGAACCCTCGGTGGGGTTG  
AAGCGGTACCTTAGCGGAACTGATTCAGTCGCTGTTTGAGTTT

### Dup18\_clone10

GAAAATCACGGTTTCTTGCTATTGCCAGGATCCTCGGTTTCCGTCGACCCCCGGGGG  
GAAGCACCTTATTGATGGTCGACGGAAGGTCTTACTGTGACCCGCCGTTAGCAGCCTT  
ATGGCCCGTATATCGGGCATG GTTTCAGACGAACCCTCGTGGGGTTGAAG GATTGTT  
GCTGTCGTCTTGATCAGGTCCGGTCGGATC GTTTCAGACGAACCCTCGTGGGGTTGA  
AGCGGTACCTTAGCGGAACTGATTCAGTCGCTGTTTGAC

### (17)Dup19 clones (30-bp normal duplication size)

#### Dup19\_clone1

GAAAATCACGGTTTCTTGCTATTGCCAGGATCCTCGGTTTCCGTCGACCCCCGGGGG  
GAAGCACCTTATTGATGGTCGACGGAAGGTCTTACTGTGACCCGCCGTTAGCAGCCTT  
ATGGCCCGTATATCGGGCATG GTTTCAGACGAACCCTCGTGGGGTTGAAG GCTGAAG  
ATATGAGTTGGTCGGAGCTGCTCGAAG GTTTCAGACGAACCCTCGTGGGGTTGAAG C  
GGTACCTTAGCGGAACTGATTCAGTCGCTGTTTGAGTGTTTTTCGCGG

#### Dup19\_clone2

GAAAATCACGGTTTCTTGCTATTGCCAGGATCCTCGGTTTCCGTCGACCCCCGGGGG  
GAAGCACCTTATTGATGGTCGACGGAAGGTCTTACTGTGACCCGCCGTTAGCAGCCTT  
ATGGCCCGTATATCGGGCATG GTTTCAGACGAACCCTCGTGGGGTTGAAG TGACTCAT  
TACAATACCAGCTGGAACAGGTGAAA GTTTCAGACGAACCCTCGTGGGGTTGAAG  
GTGGGACGCTTGATCCTGATGCTGATGAACAGCGT GTTTCAGACGAACCCTCGTGGG  
GTTGAAG CGGTACCTTAGCGGAACTGATTCAGTCGCTGTTTGATTGG

#### Dup19\_clone3

GAAAATCACGGTTTCTTGCTATTGCCAGGATCCTCGGTTTCCGTCGACCCCCGGGGG  
GAAGCACCTTATTGATGGTCGACGGAAGGTCTTACTGTGACCCGCCGTTAGCAGCCTT  
ATGGCCCGTATATCGGGCATG GTTTCAGACGAACCCTCGTGGGGTTGAAG AGGATCA  
GACCCGATACCATACTCGAGACGCAGCGT GTTTCAGACGAACCCTCGTGGGGTTGAA  
G CGGTACCTTAGCGGAACTGATTCAGTCGCTGTTTGAGTG

#### Dup19\_clone4

GAAAATCACGGTTTCTTGCTATTGCCAGGATCCTCGGTTTCCGTCGACCCCCGGGGG  
GAAGCACCTTATTGATGGTCGACGGAAGGTCTTACTGTGACCCGCCGTTAGCAGCCTT  
ATGGCCCGTATATCGGGCATG GTTTCAGACGAACCCTCGTGGGGTTGAAG CGGTATGT  
GGCTCACCTTGAGTCCACCGGACCCACTG GTTTCAGACGAACCCTCGTGGGGTTGAA  
G CGGTACCTTAGCGGAACTGATTCAGTCGCTGTTTGA

#### Dup19\_clone5

GAAAATCACGGTTTCTTGCTATTGCCAGGATCCTCGGTTTCCGTCGACCCCCGGGGG  
GAAGCACCTTATTGATGGTCGACGGAAGGTCTTACTGTGACCCGCCGTTAGCAGCCTT  
ATGGCCCGTATATCGGGCATG GTTTCAGACGAACCCTCGTGGGGTTGAAG TTGATGCG  
GTTTCACTACTGTCCGATGCGCGAGCGG GTTTCAGACGAACCCTCGTGGGGTTGAAG  
CGGTACCTTAGCGGAACTGATTCAGTCGCTGTTTGAGTT

#### Dup19\_clone6

GAAAATCACGGTTTCTTGCTATTGCCAGGATCCTCGGTTTCCGTCGACCCCCGGGGG  
GAAGCACCTTATTGATGGTCGACGGAAGGTCTTACTGTGACCCGCCGTTAGCAGCCTT  
ATGGCCCGTATATCGGGCATG GTTTCAGACGAACCCTCGTGGGGTTGAAG GAACGTA  
CGCACGACGGACATCACACAGGACCGAGC GTTTCAGACGAACCCTCGTGGGGTTGA

AGCGGTACCTTAGCGGAACTGATTCAGTCGCTGTTTGAGTG

**Dup19\_clone7**

GAAAATCACGGTTTCTTGCTATTGCCAGGATCCTCGGTTTCCGTCGACCCCCGGGGG  
GAAGCACCTTATTGATGGTCGACGGAAGGTCTTACTGTGACCCGCCGTTAGCAGCCTT  
ATGGCCCGTATATCGGGCATG GTTTCAGACGAACCCTCGTGGGGTTGAAG ATCGACGT  
AGCACCTCTTGATTGCAGACTTAAGG GTTTCAGACGAACCCTCGTGGGGTTGAAG  
CGGTACCTTAGCGGAACTGATTCAGTCGCTGTTTGAGCTTGTTTCGCGG

**Dup19\_clone8**

GAAAATCACGGTTTCTTGCTATTGCCAGGATCCTCGGTTTCCGTCGACCCCCGGGGG  
GAAGCACCTTATTGATGGTCGACGGAAGGTCTTACTGTGACCCGCCGTTAGCAGCCTT  
ATGGCCCGTATATCGGGCATG GTTTCAGACGAACCCTCGTGGGGTTGAAG CTACAAA  
CCGTTGGTGTGACTGCTGGCGCTGCTG GTTTCAGACGAACCCTCGTGGGGTTGAAG C  
GGTACCTTAGCGGAACTGATTCAGTCGCTGTTTGAGCTTGTTTCGCGGA

**Dup19\_clone9**

GAAAATCACGGTTTCTTGCTATTGCCAGGATCCTCGGTTTCCGTCGACCCCCGGGGG  
GAAGCACCTTATTGATGGTCGACGGAAGGTCTTACTGTGACCCGCCGTTAGCAGCCTT  
ATGGCCCGTATATCGGGCATG GTTTCAGACGAACCCTCGTGGGGTTGAAG AGAAAGG  
TACGACGTACGACCCGACGACGTGGGAT GTTTCAGACGAACCCTCGTGGGGTTGAA  
CGGTACCTTAGCGGAACTGATTCAGTCGCTGTTTGAGCTTGTTTCGCGGGG

**(18)Dup20 clones (30-bp normal duplication size)**

**Dup20\_clone1**

GAAAATCACGGTTTCTTGCTATTGCCAGGATCCTCGGTTTCCGTCGACCCCCGGGGG  
GAAGCACCTTATTGATGGTCGACGGAAGGTCTTACTGTGACCCGCCGTTAGCAGCCTT  
ATGGCCCGTATATCGGGCATG GTTTCAGACGAACCCTCGTGGGGTTGAAG CTACAAA  
CCGTTGGTGTGACTGCTGGCGCTGCTGCT GTTTCAGACGAACCCTCGTGGGGTTGAA  
CGGTACCTTAGCGGAACTGATTCAGTCGCTGTTTGAGTGTTTCGCGGA

**Dup20\_clone2**

GAAAATCACGGTTTCTTGCTATTGCCAGGATCCTCGGTTTCCGTCGACCCCCGGGGG  
GAAGCACCTTATTGATGGTCGACGGAAGGTCTTACTGTGACCCGCCGTTAGCAGCCTT  
ATGGCCCGTATATCGGGCATG GTTTCAGACGAACCCTCGTGGGGTTGAAG CCACCCA  
CAAACCCACCCACCCACAGGACACCGGA GTTTCAGACGAACCCTCGTGGGGTTGAA  
CGGTACCTTAGCGGAACTGATTCAGTCGCTGTTTGAG

**Dup20\_clone3**

GAAAATCACGGTTTCTTGCTATTGCCAGGATCCTCGGTTTCCGTCGACCCCCGGGGG  
GAAGCACCTTATTGATGGTCGACGGAAGGTCTTACTGTGACCCGCCGTTAGCAGCCTT  
ATGGCCCGTATATCGGGCATG GTTTCAGACGAACCCTCGTGGGGTTGAAG GACTTGT  
CCGGTCTGTCGCTCGGTGGCATAACCG GTTTCAGACGAACCCTCGTGGGGTTGAAG C  
GGTACCTTAGCGGAACTGATTCAGTCGCTGTTTGAGTTGGTTTCGCGG

**Dup20\_clone4**

GAAAATCACGGTTTCTTGCTATTGCCAGGATCCTCGGTTTCCGTCGACCCCCGGGGG  
GAAGCACCTTATTGATGGTCGACGGAAGGTCTTACTGTGACCCGCCGTTAGCAGCCTT  
ATGGCCCGTATATCGGGCATG GTTTCAGACGAACCCTCGTGGGGTTGAAG TCGATCA  
CCGTGCGAAACGTGCGCCGCTCGCCTCG GTTTCAGACGAACCCTCGTGGGGTTGA

AGCGGTACCTTAGCGGAACTGATTCAGTCGCTGTTTACTGATTTTCGCGG

**Dup20 \_clone5**

GAAAATCACGGTTTCTTGCTATTGCCCAGGATCCTCGGTTTCCGTCGACCCCCGGGGG  
GAAGCACCTTATTGATGGTCGACGGAAGGTCTTTACTGTGACCCGCCGTTAGCAGCCTT  
ATGGCCCGTATATCGGGCATGGTTTCAGACGAACCCTCGTGGGGGTTGAAGTCTGCTG  
GCTGCGTTGATCGTCGTGTACCTCTGGTTTCAGACGAACCCTCGTGGGGGTTGAAGC  
GGTACCTTAGCGGAACTGATTCAGTCGCTGTTTGAGTTG

**Dup20 \_clone6**

GAAAATCACGGTTTCTTGCTATTGCCCAGGATCCTCGGTTTCCGTCGACCCCCGGGGG  
GAAGCACCTTATTGATGGTCGACGGAAGGTCTTTACTGTGACCCGCCGTTAGCAGCCTT  
ATGGCCCGTATATCGGGCATGGTTTCAGACGAACCCTCGTGGGGGTTGAAGGTACACG  
TTGACCGGGCAGCATGCCGTTGTCGCGTCGAGTTTCAGACGAACCCTCGTGGGGGTTG  
AAGCGGTACCTTAGCGGAACTGATTCAGTCGCTGTTTACTGTTTCGCGG

**Dup20 \_clone7**

GAAAATCACGGTTTCTTGCTATTGCCCAGGATCCTCGGTTTCCGTCGACCCCCGGGGG  
GAAGCACCTTATTGATGGTCGACGGAAGGTCTTTACTGTGACCCGCCGTTAGCAGCCTT  
ATGGCCCGTATATCGGGCATGGTTTCAGACGAACCCTCGTGGGGGTTGAAGGAATCATT  
AGCGAGATATGCAGCAGCATAACGAAGCGTTTCAGACGAACCCTCGTGGGGGTTGAAG  
CGGTACCTTAGCGGAACTGATTCAGTCGCTGTTTGAGCTGTTTCGCGG

**Dup20 \_clone8**

GAAAATCACGGTTTCTTGCTATTGCCCAGGATCCTCGGTTTCCGTCGACCCCCGGGGG  
GAAGCACCTTATTGATGGTCGACGGAAGGTCTTTACTGTGACCCGCCGTTAGCAGCCTT  
ATGGCCCGTATATCGGGCATGGTTTCAGACGAACCCTCGTGGGGGTTGAAGACTAATA  
AGAGGATTACTGATGGCTGTGGTAATGAGTTTCAGACGAACCCTCGTGGGGGTTGAAG  
CGGTACCTTAGCGGAACTGATTCAGTCGCTGTTTGAGTGCTTTTCTTCGGGG

**Dup20 \_clone9**

GAAAATCACGGTTTCTTGCTATTGCCCAGGATCCTCGGTTTCCGTCGACCCCCGGGGG  
GAAGCACCTTATTGATGGTCGACGGAAGGTCTTTACTGTGACCCGCCGTTAGCAGCCTT  
ATGGCCCGTATATCGGGCATGGTTTCAGACGAACCCTCGTGGGGGTTGAAGCTAGTGC  
TCGCCAGATTCAACGAGCAACCGATCAGGGTTTCAGACGAACCCTCGTGGGGGTTGA  
AGCGGTACCTTAGCGGAACTGATTCAGTCGCTGTTTACTGG

**Dup20 \_clone10**

GAAAATCACGGTTTCTTGCTATTGCCCAGGATCCTCGGTTTCCGTCGACCCCCGGGGG  
GAAGCACCTTATTGATGGTCGACGGAAGGTCTTTACTGTGACCCGCCGTTAGCAGCCTT  
ATGGCCCGTATATCGGGCATGGTTTCAGACGAACCCTCGTGGGGGTTGAAGTTTAACA  
CCGAGCCTAAAGGTGCTGAGTCTTCGGGTTTCAGACGAACCCTCGTGGGGGTTGAA  
GCGGTACCTTAGCGGAACTGATTCAGTCGCTGTTTACTGGTTTCGCGG

**(19)Dup21-25 clones (30-bp normal duplication size)**

**Dup21-25 \_clone1**

GAAAATCACGGTTTCTTGCTATTGCCCAGGATCCTCGGTTTCCGTCGACCCCCGGGGG  
GAAGCACCTTATTGATGGTCGACGGAAGGTCTTTACTGTGACCCGCCGTTAGCAGCCTT  
ATGGCCCGTATATCGGGCATGGTTTCAGACGAACCCTCGTGGGGGTTGGGTIAGTGGTG  
AGTTGACTGCGCTCGAGGAAACACAGTCGGGTTTCAGACGAACCCTCGTGGGGGTTGG

**GTI**GAAGCGGTACCTTAGCGGAACTGATTCAGTCGCTGTTTGAGCTGTTTCGCGG

**Dup21-25 \_clone2**

GAAAATCACGGTTTCTTGCTATTGCCAGGATCCTCGGTTTCCGTCGACCCCCGGGGG  
GAAGCACCTTATTGATGGTCGACGGAAGGTCTTACTGTGACCCGCCGTTAGCAGCCTT  
ATGGCCCGTATATCGGGCATG**GTTTCAGACGAACCCTCGTGGGGTTGGGTI**TCATCCAT  
CACGTAGCGCAGCGAACGACCAGCACC**GTTTCAGACGAACCCTCGTGGGGTTGGGTI**  
GAAGCGGTACCTTAGCGGAACTGATTCAGTCGCTGTTTGAGCTGTTTCGCGG

**Dup21-25 \_clone3**

GAAAATCACGGTTTCTTGCTATTGCCAGGATCCTCGGTTTCCGTCGACCCCCGGGGG  
GAAGCACCTTATTGATGGTCGACGGAAGGTCTTACTGTGACCCGCCGTTAGCAGCCTT  
ATGGCCCGTATATCGGGCATG**GTTTCAGACGAACCCTCGTGGGGTTGGGTI**TCGATCAC  
CGTGCGAAACGTCGCCGCGCTCGCCTCGA**GTTTCAGACGAACCCTCGTGGGGTTGGG**

**TI**GAAGCGGTACCTTAGCGGAACTGATTCAGTCGCTGTTTGAGCTGTTTCGCGG

**Dup21-25 \_clone4**

GAAAATCACGGTTTCTTGCTATTGCCAGGATCCTCGGTTTCCGTCGACCCCCGGGGG  
GAAGCACCTTATTGATGGTCGACGGAAGGTCTTACTGTGACCCGCCGTTAGCAGCCTT  
ATGGCCCGTATATCGGGCATG**GTTTCAGACGAACCCTCGTGGGGTTGGGTI**TTTCGAG  
ACCACGACGGGGCCGGGTATAGCGAAC**GTTTCAGACGAACCCTCGTGGGGTTGGGTI**

**T**GAAGCGGTACCTTAACGGAAGTTCAGTCGCTGTTTGAGCTGTTTCGCGG

**Dup21-25 \_clone5**

GAAAATCACGGTTTCTTGCTATTGCCAGGATCCTCGGTTTCCGTCGACCCCCGGGGG  
GAAGCACCTTATTGATGGTCGACGGAAGGTCTTACTGTGACCCGCCGTTAGCAGCCTT  
ATGGCCCGTATATCGGGCATG**GTTTCAGACGAACCCTCGTGGGGTTGGGTI**GCGCTTTT  
CTGTCGAGCCAGACGAATCTTCAACAGT**GTTTCAGACGAACCCTCGTGGGGTTGGGTI**  
GAAGCGGTACCTTANCGGAACTGATTCAGTCGCTGTTTGAGCTGTTTCGCGG

**Dup21-25 \_clone6**

GAAAATCACGGTTTCTTGCTATTGCCAGGATCCTCGGTTTCCGTCGACCCCCGGGGG  
GAAGCACCTTATTGATGGTCGACGGAAGGTCTTACTGTGACCCGCCGTTAGCAGCCTT  
ATGGCCCGTATATCGGGCATG**GTTTCAGACGAACCCTCGTGGGGTTGGGTI**GCGCTCTT  
GTTACAGGTGACGAATCAGTACCGCCACC**GTTTCAGACGAACCCTCGTGGGGTTGGGTI**  
GAAGCGGTACCTTAGCGGAACTGATTCAGTCGCTGTTTGAGTGTTCGCGGA

**Dup21-25 \_clone7**

GAAAATCACGGTTTCTTGCTATTGCCAGGATCCTCGGTTTCCGTCGACCCCCGGGGG  
GAAGCACCTTATTGATGGTCGACGGAAGGTCTTACTGTGACCCGCCGTTAGCAGCCTT  
ATGGCCCGTATATCGGGCATG**GTTTCAGACGAACCCTCGTGGGGTTGGGTI**CGGTATGT  
GGCTCACCTTGAGTCCACCGGACCCACT**GTTTCAGACGAACCCTCGTGGGGTTGGGTI**  
GAAGCGGTACCTTAGCGGAACTGATTCAGTCGCTGTTTGAGCTGTTTCGCGG

**Dup21-25 \_clone8**

GAAAATCACGGTTTCTTGCTATTGCCAGGATCCTCGGTTTCCGTCGACCCCCGGGGG  
GAAGCACCTTATTGGTGGTCGACGGAAGGTCTTACTGTGACCCGCCGTTAGCAGCCTT  
TATGGCCCGTATATCGGGCATG**GTTTCAGACGAACCCTCGTGGGGTTGGGTI**GACCCGC  
GCCAACGGGTATGAGTTTGCGGCGTTCAAGC**GTTTCAGACGAACCCTCGTGGGGTTGG**

**GTI**GAAGCGGTACCTTAGCGGAACTGATTCAGTCGCTGTTTGAGTGTTCGCGGA

**Dup21-25 \_clone9**

GAAAATCACGGTTTCTTGCTATTGCCAGGATCCTCGGTTTCCGTCGACCCCCGGGGG  
GAAGCACCTTATTGATGGTCGACGGAAGGTCTTTACTGTGACCCGCCGTTAGCAGCCTT  
ATGGCCCGTATATCGGGCATG[GTTTCAGACGAACCCTCGTGGGGTTGGGT]CGACTGA  
GGATATTGTTGATCCGATCACGGCGGC[GTTTCAGACGAACCCTCGTGGGGTTGGGT]G  
AAGCGGTACCTTAGCGGAACTGATTCAGTCGCTGTTTGAGTGGTTTCGCGGA

**Dup21-25 \_clone10**

GAAAATCACGGTTTCTTGCTATTGCCAGGATCCTCGGTTTCCGTCGACCCCCGGGGG  
GAAGCACCTTATTGATGGTCGACGGAAGGTCTTTACTGTGACCCGCCGTTAGCAGCCTT  
ATGGCCCGTATATCGGGCATG[GTTTCAGACGAACCCTCGTGGGGTTGGGT]ACTCCGTT  
AGCAAACGCTTTGCGAACTGAACGTG[GTTTCAGACGAACCCTCGTGGGGTTGGGT]  
TGAAGCGGTACCTTAGCGGAACTGATTCAGTCGCTGTTTGACTTGTTTCGCGG.

**Dup21-25 \_clone11**

GAAAATCACGGTTTCTTGCTATTGCCAGGATCCTCGGTTTCCGTCGACCCCCGGGGG  
GAAGCACCTTATTGATGGTCGACGGAAGGTCTTTACTGTGACCCGCCGTTAGCAGCCTT  
ATGGCCCGTATATCGGGCATG[GTTTCAGACGAACCCTCGTGGGGTTGGGT]AGGGGCA  
ACAGCAGAATCAGGTATCGGAACGTCACC[GTTTCAGACGAACCCTCGTGGGGTTGGG]  
TGAAGCGGTACCTTAGCGGAACTGATTCAGTCGCTGTTTGACTTGTTTCGCGG

**(20)Del21-25 clones (30-bp normal duplication size)**

**Del21-25 \_clone1**

GAAAATCACGGTTTCTTGCTATTGCCAGGATCCTCGGTTTCCGTCGACCCCCGGGGG  
GGAAGCACCTTATTGATGGTCGACGGAAGGTCTTTACTGTGACCCGCCGTTAGCAGCC  
TTATGGCCCGTATATCGGGCATG[GTTTCAGACGAACCCTCGTGGAAGCGGTAC]GAAGA  
GGGCACGCTGCCTGATCACGGTGAGTCGCTG[GTTTCAGACGAACCCTCGTGGAAGCG]  
GTACCTTAGCGGAACTGATTCAGTCGCTGTTTGAGTTTGTTCGCGG

**Del21-25 \_clone2**

GAAAATCACGGTTTCTTGCTATTGCCAGGATCCTCGGTTTCCGTCGACCCCCGGGGG  
GAAGCACCTTATTGATGGTCGACGGAAGGTCTTTACTGTGACCCGCCGTTAGCAGCCTT  
ATGGCCCGTATATCGGGCATG[GTTTCAGACGAACCCTCGTGGAAGCGGTAC]GTCGAGA  
ATGCGATTGCTGATGCTGATTCTGGTCC[GTTTCAGACGAACCCTCGTGGAAGCGGTAC]  
CTTAGCGGAACTGATTCAGTCGCTGTTTGACTGGTTTCGCGGA

**Del21-25 \_clone3**

GAAAATCACGGTTTCTTGCTATTGCCAGGATCCTCGGTTTCCGTCGACCCCCGGGGG  
GAAGCACCTTATTGATGGTCGACGGAAGGTCTTTACTGTGACCCGCCGTTAGCAGCCTT  
ATGGCCCGTATATCGGGCATG[GTTTCAGACGAACCCTCGTGGAAGCGGTAC]GGATAGT  
TGAGCACGTTGGTAATGATGTGTCTGCCTG[GTTTCAGACGAACCCTCGTGGAAGCGGT]  
ACTTAGCGGAACTGATTCAGTCGCTGTTTGAGCTGTTTCGCGG

**Del21-25 \_clone4**

GAAAATCACGGTTTCTTGCTATTGCCAGGATCCTCGGTTTCCGTCGACCCCCGGGGG  
GAAGCACCTTATTGATGGTCGACGGAAGGTCTTTACTGTGACCCGCCGTTAGCAGCCTT  
ATGGCCCGTATATCGGGCATG[GTTTCAGACGAACCCTCGTGGAAGCGGTAC]GGATAGT  
TGAGCACGTTGGTAATGATGTGTCTG[GTTTCAGACGAACCCTCGTGGAAGCGGTAC]CT  
TAGCGGAACTGATTCAGTCGCTGTTTGAGCTGTTTCGCGG

**Del21-25 \_clone5**

GAAAATCACGGTTTCTTGCTATTGCCAGGATCCTCGGTTTCCGTCGACCCCCGGGGG  
GAAGCACCTTATTGATGGTCGACGGAAGGTCTTTACTGTGACCCGCCGTTAGCAGCCTT  
ATGGCCCGTATATCGGGCATG GTTTCAGACGAACCCTCGTGGAAGCGGTAC GTCTTGC  
GGTGATTGCTGCTGAGTCTGACTGCGGTA GTTTCAGACGAACCCTCGTGGAAGCGGTA  
CCTTAGCGGAACTGATTCAGTCGCTGTTTGAGTTGTTTCGCGG

**Del21-25\_clone6**

GAAAATCACGGTTTCTTGCTATTGCCAGGATCCTCGGTTTCCGTCGACCCCCGGGGG  
GAAGCACCTTATTGATGGTCGACGGAAGGTCTTTACTGTGACCCGCCGTTAGCAGCCTT  
ATGGCCCGTATATCGGGCATG GTTTCAGACGAACCCTCGTGGAAGCGGTAC GGATAGT  
TGAGCACGTTGGTAATGATGTGTCTGCCT GTTTCAGACGAACCCTCGTGGAAGCGGTA  
CCTTAGCGGAACTGATTCAGTCGCTGTTTGACTGTTTCGCGGA

**Del21-25\_clone7**

GAAAATCACGGTTTCTTGCTATTGCCAGGATCCTCGGTTTCCGTCGACCCCCGGGGG  
GAAGCACCTTATTGATGGTCGACGGAAGGTCTTTACTGTGACCCGCCGTTAGCAGCCTT  
ATGGCCCGTATATCGGGCATG GTTTCAGACGAACCCTCGTGGAAGCGGTAC AGCAGAA  
CATTCTGACTATTACAATACCCAGCTG GTTTCAGACGAACCCTCGTGGAAGCGGTAC  
CTTAGCGGAACTGATTCAGTCGCTGTTTGAGTTGGTTTCGCGGA

**Del21-25\_clone8**

GAAAATCACGGTTTCTTGCTATTGCCAGGATCCTCGGTTTCCGTCGACCCCCGGGGG  
GAAGCACCTTATTGATGGTCGACGGAAGGTCTTTACTGTGACCCGCCGTTAGCAGCCTT  
ATGGCCCGTATATCGGGCATG GTTTCAGACGAACCCTCGTGGAAGCGGTAC GCCAAAC  
ACAGCTCGAGCTGCAAGAAGAGTCTCAA GTTTCAGACGAACCCTCGTGGAAGCGGTA  
CCGTACCCGCCGACTTGCCGACGCTTTCGGGTATG GTTTCAGACGAACCCTCGTGGA  
GCGGTAC CTTAGCGGAACTGATTCAGTCGCTGTTTGAGTTGGTTTCGCGGA

**Del21-25\_clone9**

GAAAATCACGGTTTCTTGCTATTGCCAGGATCCTCGGTTTCCGTCGACCCCCGGGGG  
GAAGCACCTTATTGATGGTCGACGGAAGGTCTTTACTGTGACCCGCCGTTAGCAGCCTT  
ATGGCCCGTATATCGGGCATG GTTTCAGACGAACCCTCGTGGAAGCGGTAC TTGCGCG  
AGCGCGAGGTTTCGCTGTAATGCGATTGTCC GTTTCAGACGAACCCTCGTGGAAGCGGT  
ACCTTAGCGGAACTGATTCAGTCGCTGTTTGAGTTGGTTTCGCGG

**Del21-25\_clone10**

GAAAATCACGGTTTCTTGCTATTGCCAGGATCCTCGGTTTCCGTCGACCCCCGGGGG  
GAAGCACCTTATTGATGGTCGACGGAAGGTCTTTACTGTGACCCGCCGTTAGCAGCCTT  
ATGGCCCGTATATCGGGCGTG GTTTCAGACGAACCCTCGTGGAAGCGGTAC AGTGGTG  
AGTTGACTGCGCTCGAGGAAACACAGTCG GTTTCAGACGAACCCTCGTGGAAGCGGT  
ACCTTAGCGGAACTGATTCAGTCGCTGTTTGACTGGTTTCGCGGA

**Del21-25\_clone11**

GAAAATCACGGTTTCTTGCTATTGCCAGGATCCTCGGTTTCCGTCGACCCCCGGGGG  
GAAGCACCTTATTGATGGTCGACGGAAGGTCTTTACTGTGACCCGCCGTTAGCAGCCTT  
ATGGCCCGTATATCGGGCATG GTTTCAGACGAACCCTCGTGGAAGCGGTAC GCAGACC  
ACGACGGGGGCCGGTATAGCGAACGGACA GTTTCAGACGAACCCTCGTGGAAGCGG  
TACCTTAGCGGAACTGATTCAGTCGCTGTTTGAGTTGGTTTCGCGG

(21) Ins3\_clones (33-bp normal duplication size)

**Ins3\_clone1**

GAAAATCACGGTTTCTTGCTATTGCCAGGATCCTCGGTTTCCGTCGACCCCCGGGGG  
GAAGCACCTTATTGATGGTCGACGGAAGGTCTTTACTGTGACCCGCCGTTAGCAGCCTT  
ATGGCCCGTATATCGGGCATGGTTTCAGACGAACCCTCTCCGTGGGGTTGAAGCCGGTA  
TGTGGCTCACCTTGAGTCCACCGACCAGTTTCAGACGAACCCTCTCCGTGGGGTTG  
AAGCGGTACCTTAGCGGAAGTATTAGTCGCTGTTTACTGGTTTCGCGGGA

**Ins3\_clone2**

GAAAATCACGGTTTCTTGCTATTGCCAGGATCCTCGGTTTCCGTCGACCCCCGGGGG  
GAAGCACCTTATTGATGGTCGACGGAAGGTCTTTACTGTGACCCGCCGTTAGCAGCCTT  
ATGGCCCGTATATCGGGCATGGTTTCAGACGAACCCTCTCCGTGGGGTTGAAGCGCTG  
TCTTTCGTCGAGAATGCGATTGCTGATGCTGGTTTCAGACGAACCCTCTCCGTGGGGTT  
GAAGCGGTACCTTAGCGGAAGTATTAGTCGCTGTTTACTGGTTTCGCGGAGG

**Ins3\_clone3**

GAAAATCACGGTTTCTTGCTATTGCCAGGATCCTCGGTTTCCGTCGACCCCCGGGGG  
GAAGCACCTTATTGATGGTCGACGGAAGGTCTTTACTGTGACCCGCCGTTAGCAGCCTT  
ATGGCCCGTATATCGGGCATGGTTTCAGACGAACCCTCTCCGTGGGGTTGAAGCCGTA  
CCCGCCGACTTGCCGACGCTTCCGGTATGTGGTTTCAGACGAACCCTCTCCGTGGGG  
TTGAAGCGGTACCTTAGCGGAAGTATTAGTCGCTGTTTACTGGTTTCGCGGGA

**Ins3\_clone4**

GAAAATCACGGTTTCTTGCTATTGCCAGGATCCTCGGTTTCCGTCGACCCCCGGGGG  
GAAGCACCTTATTGATGGTCGACGGAAGGTCTTTACTGTGACCCGCCGTTAGCAGCCTT  
ATGGCCCGTATATCGGGCATGGTTTCAGACGAACCCTCTCCGTGGGGTTGAAGCAAGC  
ATAAAGGCAATGACCGGTTTCTGAAGTGCGGTTTCAGACGAACCCTCTCCGTGGGGT  
TGAAGCGGTACCTTAGCGGAAGTATTAGTCGCTGTTTACTGGTTTCGCGGTTA

**Ins3\_clone5**

GAAAATCACGGTTTCTTGCTATTGCCAGGATCCTCGGTTTCCGTCGACCCCCGGGGG  
GAAGCACCTTATTGATGGTCGACGGAAGGTCTTTACTGTGACCCGCCGTTAGCAGCCTT  
ATGGCCCGTATATCGGGCATGGTTTCAGACGAACCCTCTCCGTGGGGTTGAAGCGAAT  
CATTAGCGAGATATGCAGCAGCATACTGAAGGTTTCAGACGAACCCTCTCCGTGGGGT  
GAAGCGGTACCTTAGCGGAAGTATTAGTCGCTGTTTACTGGTTTCGCGGGA

**Ins3\_clone6**

GAAAATCACGGTTTCTTGCTATTGCCAGGATCCTCGGTTTCCGTCGACCCCCGGGGG  
GAAGCACCTTATTGATGGTCGACGGAAGGTCTTTACTGTGACCCGCCGTTAGCAGCCTT  
ATGGCCCGTATATCGGGCATGGTTTCAGACGAACCCTCTCCGTGGGGTTGAAGCGTGC  
TGATCGATGAGGGCAGCACGCACTTCGATGGTTTCAGACGAACCCTCTCCGTGGGGTT  
GAAGCGGTACCTTAGCGGAAGTATTAGTCGCTGTTTACTGGTTTCGCGGAA

**Ins3\_clone7**

GAAAATCACGGTTTCTTGCTATTGCCAGGATCCTCGGTTTCCGTCGACCCCCGGGGG  
GAAGCACCTTATTGATGGTCGACGGAAGGTCTTTACTGTGACCCGCCGTTAGCAGCCTT  
ATGGCCCGTATATCGGGCATGGTTTCAGACGAACCCTCTCCGTGGGGTTGAAGCCCTC  
GGTCAGAATAGGCTGCGTTCGCTGCTCTGGTTGTTTCAGACGAACCCTCTCCGTGGGG  
TTGAAGCGGTACCTTAGCGGAAGTATTAGTCGCTGTTTACTGGTTTCGCGGGA

**Ins3\_clone8**

GAAAATCACGGTTTCTTGCTATTGCCAGGATCCTCGGTTTCCGTCGACCCCCGGGGG



GAAGCACCTTATTGATGGTCGACGGAAGGTCTTTACTGTGACCCGCCGTTAGCAGCCTT  
ATGGCCCGTATATCGGGCATG[GTTTCAGACGAACCCTCTCCGTGGGGTTGAAGC]ACTC  
CGTTAGCAAAACGCTTTGCGAAACTGAACG[GTTTCAGACGAACCCTCTCCGTGGGGTT  
GAAGC]GGTACCTTAGCGGAACTGATTCAGTCGCTGTTTACTGGTTTCGCGG

**Ins3\_clone9**

GAAAATCACGGTTTCTTGCTATTGCCAGGATCCTCGGTTTCCGTCGACCCCCGGGGG  
GAAGCACCTTATTGATGGTCGACGGAAGGTCTTTACTGTGACCCGCCGTTAGCAGCCTT  
ATGGCCCGTATATCGGGCATG[GTTTCAGACGAACCCTCTCCGTGGGGTTGAAGC]AATAC  
ATCGGTCCTGCGCTGCTGATCGTTGGCTGC[GTTTCAGACGAACCCTCTCCGTGGGGTT  
GAAGC]GGTACCTTAGCGGAACTGATTCAGTCGCTGTTTACTGGTTTCGCGGGAA

**Ins3\_clone10**

GAAAATCACGGTTTCTTGCTATTGCCAGGATCCTCGGTTTCCGTCGACCCCCGGGGG  
GAAGCACCTTATTGATGGTCGACGGAAGGTCTTTACTGTGACCCGCCGTTAGCAGCCTT  
ATGGCCCGTATATCGGGCATG[GTTTCAGACGAACCCTCTCCGTGGGGTTGAAGC]TTTAA  
GAGCGAGCCTGAGGTTGCTGAGTTCTTCGG[GTTTCAGACGAACCCTCTCCGTGGGGTT  
GAAGC]GGTACCTTAGCGGAACTGATTCAGTCGCTGTTTACTGGTTTCGCGGA

## REFERENCES

1. Liu, H., Han, J., Liu, X., Zhou, J. and Xiang, H. (2011) Development of pyrF-based gene knockout systems for genome-wide manipulation of the archaea *Haloferax mediterranei* and *Haloarcula hispanica*. *J Genet Genomics*, **38**, 261-269.
